# Supplementary material for: Formation of Salts and Molecular Ionic Cocrystals of Fluoroquinolones and α,ω-Dicarboxylic Acids
Source: PubMed Central journal article supplement (PMC9073931; doi:10.1021/acs.cgd.1c01509), 2022-04-11
Supplement: cg1c01509_si_001.pdf [file cg1c01509_si_001.pdf]

# Formation of Salts and Molecular Ionic Cocrystals of Fluoroquinolones and $\alpha,\omega$ -Dicarboxylic Acids

Ciaran O'Malley,<sup>1</sup> Patrick McArdle,<sup>1,\*</sup> and Andrea Erxleben<sup>1,2,\*</sup>

<sup>1</sup> School of Chemistry, National University of Ireland, Galway, H91TK33, Ireland

<sup>2</sup> Synthesis and Solid State Pharmaceutical Centre (SSPC), Limerick, V94T9PX, Ireland

\*Corresponding author email address: andrea.erxleben@nuigalway.ie (AE);

p.mcardle@nuigalway.ie (PM)

## Supporting Information

**Table S1.** Solution crystallization experiments for supramolecular salts of enro.

**Table S2.** Solution crystallization experiments for supramolecular salts of nor.

**Table S3.** Solution crystallization experiments for supramolecular salts of cip.

**Table S4.** Crystallographic data of the supramolecular salts of enro.

**Table S5.** Crystallographic data of the supramolecular salts of nor (1/2).

**Table S6.** Crystallographic data of the supramolecular salts of nor (2/2).

**Table S7.** Crystallographic data of the supramolecular salts of cip.

**Table S8.** Crystallographic data of enro·CH<sub>3</sub>CN and enro·H<sub>2</sub>O.

**Table S9.** H bonding interactions in the salts of nor, cip and enro.

**Table S10.** Results of the screening of the fluoroquinolone salts for gelator properties by heating followed by slow cooling to room temperature (salt : solvent = 1 : 10 (w/w)).

**Figure S1.** Crystal structures of enro·CH<sub>3</sub>CN and enro·H<sub>2</sub>O.

**Figure S2.** H bonding motif and crystal packing of (enro<sup>+</sup>)(glu<sup>-</sup>)·0.33CH<sub>3</sub>CN·0.67H<sub>2</sub>O.

**Figure S3.** H bonding motif in (cip<sup>+</sup>)(pim<sup>-</sup>).

**Figure S4.** H bonding motif in (enro<sup>+</sup>)(seb<sup>-</sup>).

**Figure S5.** H bonding motif in (enro<sup>+</sup>)(sub<sup>-</sup>)·H<sub>2</sub>O.

**Figure S6.** H bonding motif in  $(\text{enro}^+)_2(\text{pim}^{2-}) \cdot 1.5\text{H}_2\text{O}$ .

**Figure S7.** H bonding motif in  $(\text{nor}^+)_2(\text{seb}^{2-}) \cdot 4\text{CH}_3\text{OH}$ .

**Figure S8.** Crystal packing of  $(\text{nor}^+)_2(\text{pim}^{2-}) \cdot \text{C}_2\text{H}_5\text{OH}$ .

**Figures S9 – S18.** XRPD patterns of the solid phases before and after the solubility measurement.

**Figures S19 – S30.** DSC and TGA plots.

**Figures S31 – S48.** XRPD patterns of the salts prepared by ball-milling.

**Figure S49.** Rheological response (oscillatory amplitude sweep) of supramolecular gels of cip/sub from propylene glycol, nor/az from propylene glycol, enro/sub from propylene glycol and enro/sub from water.

**Figure S50.** Rheological response (frequency sweep) of supramolecular gels of cip/sub from propylene glycol, nor/az from propylene glycol, enro/sub from propylene glycol and enro/sub from water.

**Figure S51.** Scanning electron microscopy image of the (a) nor/az/propylene glycol, (b) cip/sub/propylene glycol and (c) enro/sub/water xerogels.

**Figure S52.** XRPD pattern of the dried nor/az/propylene glycol gel.

**Figure S53.** XRPD patterns of the dried enro/sub/ $\text{H}_2\text{O}$  and enro//sub/propylene glycol gels.

**Table S1.** Solution crystallization experiments for supramolecular salts of enro.

| Coformer | Solvent                   | Result                                                                                                         |
|----------|---------------------------|----------------------------------------------------------------------------------------------------------------|
| Glu      | Acetonitrile              | Crystallization of $(\text{enro}^+)(\text{glu}^-) \cdot 0.33\text{CH}_3\text{CN} \cdot 0.67\text{H}_2\text{O}$ |
| Glu      | 1:1 Acetonitrile/methanol | Powder                                                                                                         |
| Glu      | Water                     | Powder                                                                                                         |
| Adi      | Methanol                  | Crystallization of $\text{enro} \cdot \text{H}_2\text{O}$                                                      |
| Adi      | Ethanol                   | Powder                                                                                                         |
| Adi      | Acetonitrile              | Crystallization of $(\text{enro}^+)_2(\text{adi}^{2-}) \cdot \text{adi} \cdot 2\text{CH}_3\text{CN}$           |
| Adi      | 1:1 Acetonitrile/methanol | Poor quality crystals                                                                                          |
| Adi      | Water                     | Powder                                                                                                         |
| Pim      | Methanol                  | Crystallization of $(\text{enro}^+)_2(\text{pim}^{2-}) \cdot 1.5\text{H}_2\text{O}$                            |
| Pim      | Ethanol                   | Powder                                                                                                         |
| Pim      | Acetonitrile              | Crystallization of $(\text{enro}^+)(\text{pim}^-) \cdot \text{H}_2\text{O}$                                    |
| Pim      | 1:1 Acetonitrile/methanol | Crystallization of $\text{enro} \cdot \text{CH}_3\text{CN}$                                                    |
| Pim      | Water                     | Crystallization of $(\text{enro}^+)(\text{pim}^-) \cdot 3\text{H}_2\text{O}$                                   |
| Sub      | Methanol                  | Powder                                                                                                         |
| Sub      | Ethanol                   | Poor quality crystals                                                                                          |
| Sub      | Acetonitrile              | Crystallization of $(\text{enro}^+)(\text{sub}^-) \cdot \text{H}_2\text{O}$                                    |
| Sub      | 1:1 Acetonitrile/methanol | Powder                                                                                                         |
| Sub      | Water                     | Crystallization of $(\text{enro}^+)(\text{sub}^-) \cdot \text{H}_2\text{O}$                                    |
| Az       | Methanol                  | Poor quality crystals                                                                                          |
| Az       | Ethanol                   | Powder                                                                                                         |
| Az       | Acetonitrile              | Crystallization of $(\text{enro}^+)(\text{az}^-)$                                                              |
| Az       | 1:1 Acetonitrile/methanol | Powder                                                                                                         |
| Az       | Water                     | Crystallization of $(\text{enro}^+)(\text{az}^-)$                                                              |
| Seb      | Acetonitrile              | Crystallization of $(\text{enro}^+)(\text{seb}^-)$                                                             |
| Seb      | 1:1 Acetonitrile/methanol | Poor quality crystals                                                                                          |
| Seb      | Water                     | Powder                                                                                                         |

**Table S2.** Solution crystallization experiments for supramolecular salts of nor.

| Coformer          | Solvent                   | Result                                                                                                      |
|-------------------|---------------------------|-------------------------------------------------------------------------------------------------------------|
| Glu               | Methanol                  | Crystallization of $(\text{nor}^+)_2(\text{glu}^{2-})\cdot\text{H}_2\text{O}\cdot\text{CH}_3\text{OH}$      |
| Glu               | Acetonitrile              | Crystallization of $(\text{nor}^+)_2(\text{glu}^{2-})\cdot\text{H}_2\text{O}\cdot 0.75\text{CH}_3\text{CN}$ |
| Glu               | 1:1 Acetonitrile/Methanol | Crystallization of $(\text{nor}^+)_2(\text{glu}^{2-})\cdot\text{H}_2\text{O}\cdot\text{CH}_3\text{OH}$      |
| Glu <sup>``</sup> | Water                     | Powder                                                                                                      |
| Adi               | Methanol                  | Crystallization of LOQKOT                                                                                   |
| Adi               | Ethanol                   | Poor quality crystals                                                                                       |
| Adi               | Acetonitrile              | Powder                                                                                                      |
| Adi               | 1:1 Acetonitrile/Methanol | Crystallization of known salt $(\text{nor}^+)_2(\text{adi}^{2-})\cdot 2\text{H}_2\text{O}$ Form II          |
| Adi               | Water                     | Crystallization of $(\text{nor}^+)_2(\text{adi}^{2-})\cdot 2\text{H}_2\text{O}$ Form I                      |
| Adi               | Acetone                   | Powder                                                                                                      |
| Adi               | Ethyl Acetate             | Powder                                                                                                      |
| Pim               | Methanol                  | Crystallization of $(\text{nor}^+)(\text{pim}^-)\cdot\text{CH}_3\text{OH}$                                  |
| Pim               | Ethanol                   | Crystallization of $(\text{nor}^+)_2(\text{pim}^{2-})\cdot\text{C}_2\text{H}_5\text{OH}$                    |
| Pim               | Acetonitrile              | Crystallization of $(\text{nor}^+)(\text{pim}^-)$                                                           |
| Pim               | 1:1 Acetonitrile/Methanol | Crystallization of $(\text{nor}^+)(\text{pim}^-)\cdot\text{CH}_3\text{OH}$                                  |
| Pim               | Water                     | Powder                                                                                                      |
| Pim               | Acetone                   | Powder                                                                                                      |
| Pim               | Ethyl Acetate             | Powder                                                                                                      |
| Sub               | Methanol                  | Crystallization of $(\text{nor}^+)_2(\text{sub}^{2-})\cdot\text{CH}_3\text{OH}$                             |
| Sub               | Ethanol                   | Crystallization of $(\text{nor}^+)(\text{sub}^-)$                                                           |
| Sub               | Acetonitrile              | Powder                                                                                                      |
| Sub               | 1:1 Acetonitrile/Methanol | Crystallization of $(\text{nor}^+)(\text{sub}^-)$                                                           |
| Sub               | Water                     | Crystallization of $(\text{nor}^+)(\text{sub}^-)\cdot 3\text{H}_2\text{O}$                                  |
| Az                | Methanol                  | Crystallization of $(\text{nor}^+)_2(\text{az}^{2-})\cdot\text{az}\cdot 4\text{H}_2\text{O}$                |
| Az                | Ethanol                   | Poor quality crystals                                                                                       |
| Az                | Acetonitrile              | Poor quality crystals                                                                                       |
| Az                | 1:1 Acetonitrile/Methanol | Powder                                                                                                      |
| Az                | Water                     | Crystallization of $(\text{nor}^+)_2(\text{az}^{2-})\cdot\text{az}\cdot 4\text{H}_2\text{O}$                |

|     |                           |                                                                                             |
|-----|---------------------------|---------------------------------------------------------------------------------------------|
| Az  | Toluene                   | Poor quality crystals                                                                       |
| Seb | Methanol                  | Crystallization of $(\text{nor}^+)_2(\text{seb}^{2-}) \cdot 4\text{CH}_3\text{OH}$          |
| Seb | Acetonitrile              | Crystallization of $(\text{nor}^+)(\text{seb}^-) \cdot \text{nor} \cdot \text{H}_2\text{O}$ |
| Seb | 1:1 Acetonitrile/Methanol | Crystallization of $(\text{nor}^+)(\text{seb}^-) \cdot \text{nor} \cdot \text{H}_2\text{O}$ |
| Seb | Water                     | Crystallization of $(\text{nor}^+)_2(\text{seb}^{2-}) \cdot 3\text{H}_2\text{O}$            |

**Table S3.** Solution crystallisation experiments for supramolecular salts of cip.

| Coformer | Solvent                   | Result                                                                           |
|----------|---------------------------|----------------------------------------------------------------------------------|
| Glu      | Methanol                  | Powder                                                                           |
| Glu      | Acetonitrile              | Crystallization of $(\text{cip}^+)(\text{glu}^-)$                                |
| Glu      | 1:1 Acetonitrile/Methanol | Powder                                                                           |
| Glu      | Water                     | Powder                                                                           |
| Adi      | Methanol                  | Poor quality crystals                                                            |
| Adi      | Ethanol                   | Poor quality crystals                                                            |
| Adi      | Acetonitrile              | Powder                                                                           |
| Adi      | 1:1 Acetonitrile/Methanol | Crystallization of known salt (ref code QUKHOV)                                  |
| Adi      | Water                     | Poor quality crystals                                                            |
| Adi      | Acetone                   | Powder                                                                           |
| Adi      | Ethyl Acetate             | Powder                                                                           |
| Pim      | Methanol                  | Crystallization of $(\text{cip}^+)(\text{pim}^-)$                                |
| Pim      | Ethanol                   | Crystallization of $(\text{cip}^+)(\text{pim}^-)$                                |
| Pim      | Acetonitrile              | Powder                                                                           |
| Pim      | 1:1 Acetonitrile/Methanol | Crystallization of $(\text{cip}^+)_2(\text{pim}^{2-}) \cdot \text{H}_2\text{O}$  |
| Pim      | Water                     | Crystallization of $(\text{cip}^+)(\text{pim}^-)$                                |
| Pim      | Acetone                   | Powder                                                                           |
| Pim      | Ethyl Acetate             | Powder                                                                           |
| Sub      | Methanol                  | Crystallization of $(\text{cip}^+)_2(\text{sub}^{2-}) \cdot 4\text{H}_2\text{O}$ |
| Sub      | Ethanol                   | Crystallization of $(\text{cip}^+)_2(\text{sub}^{2-}) \cdot 4\text{H}_2\text{O}$ |

|     |                           |                                                                                  |
|-----|---------------------------|----------------------------------------------------------------------------------|
| Sub | Acetonitrile              | Powder                                                                           |
| Sub | 1:1 Acetonitrile/Methanol | Poor quality crystals                                                            |
| Sub | Water                     | Crystallization of $(\text{cip}^+)_2(\text{sub}^{2-}) \cdot 4\text{H}_2\text{O}$ |
| Az  | Methanol                  | Powder                                                                           |
| Az  | Ethanol                   | Powder                                                                           |
| Az  | Acetonitrile              | Crystallization of $(\text{cip}^+)(\text{az}^-) \cdot \text{CH}_3\text{CN}$      |
| Az  | 1:1 Acetonitrile/Methanol | Powder                                                                           |
| Az  | Water                     | Powder                                                                           |
| Az  | Acetone                   | Poor quality crystals                                                            |
| Az  | Toluene                   | Powder                                                                           |
| Seb | Methanol                  | Powder                                                                           |
| Seb | Acetonitrile              | Poor quality crystals                                                            |
| Seb | 1:1 Acetonitrile/Methanol | Powder                                                                           |
| Seb | Water                     | Poor quality crystals                                                            |

**Table S4.** Crystallographic data of the supramolecular salts of enro.

| Compound                                                         | (enro <sup>+</sup> )(glu <sup>-</sup> )<br>·0.33CH <sub>3</sub> CN·0.67H <sub>2</sub> O | (enro <sup>+</sup> ) <sub>2</sub> (adi <sup>2-</sup> )<br>·adi·2CH <sub>3</sub> CN | (enro <sup>+</sup> ) <sub>2</sub> (pim <sup>2-</sup> )<br>·1.5H <sub>2</sub> O | (enro <sup>+</sup> )(pim <sup>-</sup> )<br>·H <sub>2</sub> O   | (enro <sup>+</sup> )(pim <sup>-</sup> )<br>·3H <sub>2</sub> O   | (enro <sup>+</sup> )(sub <sup>-</sup> )<br>·H <sub>2</sub> O   | (enro <sup>+</sup> )(az <sup>-</sup> )                         | (enro <sup>+</sup> )(seb <sup>-</sup> )                                       |
|------------------------------------------------------------------|-----------------------------------------------------------------------------------------|------------------------------------------------------------------------------------|--------------------------------------------------------------------------------|----------------------------------------------------------------|-----------------------------------------------------------------|----------------------------------------------------------------|----------------------------------------------------------------|-------------------------------------------------------------------------------|
| Formula                                                          | C <sub>74</sub> H <sub>93</sub> F <sub>3</sub> N <sub>10</sub> O <sub>23</sub>          | C <sub>27</sub> H <sub>35</sub> FN <sub>4</sub> O <sub>7</sub>                     | C <sub>22.5</sub> H <sub>28</sub> FN <sub>3</sub> O <sub>5.75</sub>            | C <sub>26</sub> H <sub>36</sub> FN <sub>3</sub> O <sub>8</sub> | C <sub>26</sub> H <sub>40</sub> FN <sub>3</sub> O <sub>10</sub> | C <sub>27</sub> H <sub>36</sub> FN <sub>3</sub> O <sub>8</sub> | C <sub>28</sub> H <sub>38</sub> FN <sub>3</sub> O <sub>7</sub> | C <sub>58</sub> H <sub>80</sub> F <sub>2</sub> N <sub>6</sub> O <sub>14</sub> |
| <i>M<sub>r</sub></i>                                             | 1547.58                                                                                 | 546.59                                                                             | 451.48                                                                         | 537.58                                                         | 573.61                                                          | 549.59                                                         | 547.61                                                         | 1123.28                                                                       |
| Habit                                                            | Plate                                                                                   | Plate                                                                              | Block                                                                          | Block                                                          | Needle                                                          | Needle                                                         | Block                                                          | Plate                                                                         |
| Crystal size (mm)                                                | 0.6 x 0.5 x 0.1                                                                         | 0.3 x 0.3 x 0.1                                                                    | 0.5 x 0.45 x 0.25                                                              | 0.8 x 0.6 x 0.4                                                | 0.8 x 0.15 x 0.1                                                | 0.4 x 0.1 x 0.1                                                | 0.8 x 0.7 x 0.4                                                | 0.5 x 0.3 x 0.1                                                               |
| Crystal system                                                   | Triclinic                                                                               | Triclinic                                                                          | Monoclinic                                                                     | Triclinic                                                      | Monoclinic                                                      | Triclinic                                                      | Triclinic                                                      | Triclinic                                                                     |
| Space group                                                      | P-1                                                                                     | P-1                                                                                | C2/c                                                                           | P-1                                                            | C2/c                                                            | P-1                                                            | P-1                                                            | P-1                                                                           |
| Unit cell dimensions                                             |                                                                                         |                                                                                    |                                                                                |                                                                |                                                                 |                                                                |                                                                |                                                                               |
| <i>a</i> [Å]                                                     | 9.6423                                                                                  | 7.0026                                                                             | 12.4883                                                                        | 7.6363                                                         | 26.0155                                                         | 7.0794                                                         | 7.8836                                                         | 13.5018                                                                       |
| <i>b</i> [Å]                                                     | 20.0015                                                                                 | 9.7600                                                                             | 13.8372                                                                        | 11.9558                                                        | 7.2556                                                          | 9.3834                                                         | 13.1102                                                        | 14.0602                                                                       |
| <i>c</i> [Å]                                                     | 20.7763                                                                                 | 21.9405                                                                            | 26.409                                                                         | 15.2337                                                        | 29.1351                                                         | 21.9918                                                        | 13.5774                                                        | 15.4916                                                                       |
| <i>α</i> [°]                                                     | 107.550                                                                                 | 102.046                                                                            | -                                                                              | 90.673                                                         | -                                                               | 95.841                                                         | 78.324                                                         | 91.525                                                                        |
| <i>β</i> [°]                                                     | 94.599                                                                                  | 91.811                                                                             | 91.064                                                                         | 101.762                                                        | 94.345                                                          | 91.412                                                         | 83.147                                                         | 99.744                                                                        |
| <i>γ</i> [°]                                                     | 94.758                                                                                  | 107.468                                                                            | -                                                                              | 100.700                                                        | -                                                               | 105.585                                                        | 83.569                                                         | 100.296                                                                       |
| <i>V</i> [Å <sup>3</sup> ]                                       | 3783.8                                                                                  | 1391.73                                                                            | 4562.8                                                                         | 1336.15                                                        | 5483.7                                                          | 1397.81                                                        | 1358.86                                                        | 2846.9                                                                        |
| <i>Z</i>                                                         | 2                                                                                       | 2                                                                                  | 8                                                                              | 2                                                              | 8                                                               | 2                                                              | 2                                                              | 2                                                                             |
| <i>D<sub>calc</sub></i> (g cm <sup>-3</sup> )                    | 1.358                                                                                   | 1.304                                                                              | 1.314                                                                          | 1.336                                                          | 1.390                                                           | 1.306                                                          | 1.338                                                          | 1.310                                                                         |
| No. measd. reflections                                           | 27232                                                                                   | 10057                                                                              | 14737                                                                          | 8632                                                           | 10780                                                           | 9156                                                           | 11766                                                          | 23415                                                                         |
| no. unique reflections ( <i>R<sub>int</sub></i> )                | 13792 (0.0466)                                                                          | 5103 (0.0196)                                                                      | 4169 (0.0816)                                                                  | 4890 (0.0198)                                                  | 5018 (0.0343)                                                   | 5104 (0.025)                                                   | 6221 (0.0149)                                                  | 13084 (0.0356)                                                                |
| No. obs. reflections                                             | 6018                                                                                    | 3374                                                                               | 2598                                                                           | 3212                                                           | 3721                                                            | 2635                                                           | 4803                                                           | 5787                                                                          |
| <i>Final R<sub>1</sub>, wR<sub>2</sub></i><br>(obs. reflections) | 0.0758, 0.1913                                                                          | 0.0615, 0.1638                                                                     | 0.799, 0.2490                                                                  | 0.0788,<br>0.2053                                              | 0.0469, 0.1021                                                  | 0.0751, 0.2212                                                 | 0.0509, 0.1376                                                 | 0.0572, 0.1025                                                                |
| Goodness-of-fit<br>(obs. reflections)                            | 0.960                                                                                   | 0.993                                                                              | 0.906                                                                          | 1.274                                                          | 1.072                                                           | 1.015                                                          | 1.037                                                          | 0.938                                                                         |

**Table S5.** Crystallographic data of the supramolecular salts of nor (1/2).

| Compound                                                                   | (nor <sup>+</sup> ) <sub>2</sub> (glu <sup>2-</sup> )<br>·H <sub>2</sub> O·CH <sub>3</sub> OH | (nor <sup>+</sup> ) <sub>2</sub> (glu <sup>2-</sup> )<br>·H <sub>2</sub> O·0.75CH <sub>3</sub> CN | (nor <sup>+</sup> )(pim <sup>-</sup> )<br>·CH <sub>3</sub> OH                 | (nor <sup>+</sup> ) <sub>2</sub> (pim <sup>2-</sup> )<br>·C <sub>2</sub> H <sub>5</sub> OH | (nor <sup>+</sup> )(pim <sup>-</sup> )                                        | (nor <sup>+</sup> ) <sub>2</sub> (sub <sup>2-</sup> )<br>·CH <sub>3</sub> OH    | (nor <sup>+</sup> )(sub <sup>-</sup> )<br>·3H <sub>2</sub> O    | (nor <sup>+</sup> )(sub <sup>-</sup> )                         |
|----------------------------------------------------------------------------|-----------------------------------------------------------------------------------------------|---------------------------------------------------------------------------------------------------|-------------------------------------------------------------------------------|--------------------------------------------------------------------------------------------|-------------------------------------------------------------------------------|---------------------------------------------------------------------------------|-----------------------------------------------------------------|----------------------------------------------------------------|
| Formula                                                                    | C <sub>76</sub> H <sub>96</sub> F <sub>4</sub> N <sub>12</sub> O <sub>23</sub>                | C <sub>77</sub> H <sub>92.5</sub> F <sub>4</sub> N <sub>13.5</sub> O <sub>24</sub>                | C <sub>48</sub> H <sub>68</sub> F <sub>2</sub> N <sub>6</sub> O <sub>16</sub> | C <sub>41</sub> H <sub>54</sub> F <sub>2</sub> N <sub>6</sub> O <sub>11</sub>              | C <sub>46</sub> H <sub>60</sub> F <sub>2</sub> N <sub>6</sub> O <sub>14</sub> | C <sub>84</sub> H <sub>116</sub> F <sub>4</sub> N <sub>12</sub> O <sub>24</sub> | C <sub>24</sub> H <sub>38</sub> FN <sub>3</sub> O <sub>10</sub> | C <sub>24</sub> H <sub>32</sub> FN <sub>3</sub> O <sub>7</sub> |
| <i>M<sub>r</sub></i>                                                       | 1621.64                                                                                       | 1667.14                                                                                           | 1023.08                                                                       | 844.90                                                                                     | 959.0                                                                         | 1753.88                                                                         | 547.57                                                          | 493.52                                                         |
| Habit                                                                      | Block                                                                                         | Block                                                                                             | Block                                                                         | Plate                                                                                      | Block                                                                         | Block                                                                           | Block                                                           | Needle                                                         |
| Size (mm)                                                                  | 0.75 x 0.4 x 0.4                                                                              | 0.3 x 0.3 x 0.2                                                                                   | 0.6 x 0.4 x 0.3                                                               | 0.8 x 0.3 x 0.15                                                                           | 0.7 x 0.7 x 0.5                                                               | 0.5 x 0.5 x 0.4                                                                 | 0.5 x 0.5 x 0.3                                                 | 0.7 x 0.05 x 0.0                                               |
| Crystal system                                                             | Monoclinic                                                                                    | Triclinic                                                                                         | Orthorhombic                                                                  | Triclinic                                                                                  | Triclinic                                                                     | Triclinic                                                                       | Triclinic                                                       | Triclinic                                                      |
| Space group                                                                | P21/c                                                                                         | P1                                                                                                | Pca2 <sub>1</sub>                                                             | P-1                                                                                        | P-1                                                                           | P-1                                                                             | P-1                                                             | P-1                                                            |
| Unit cell dimensions                                                       |                                                                                               |                                                                                                   |                                                                               |                                                                                            |                                                                               |                                                                                 |                                                                 |                                                                |
| <i>a</i> [Å]                                                               | 32.5998                                                                                       | 6.9942                                                                                            | 17.221                                                                        | 9.8226                                                                                     | 11.5268                                                                       | 15.035                                                                          | 9.3132                                                          | 10.0319                                                        |
| <i>b</i> [Å]                                                               | 13.8206                                                                                       | 9.433                                                                                             | 6.8957                                                                        | 12.6939                                                                                    | 14.5175                                                                       | 16.0126                                                                         | 11.4933                                                         | 10.2407                                                        |
| <i>c</i> [Å]                                                               | 17.3765                                                                                       | 32.6585                                                                                           | 42.523                                                                        | 17.2426                                                                                    | 15.8561                                                                       | 18.2009                                                                         | 14.5910                                                         | 12.1158                                                        |
| $\alpha$ [°]                                                               | -                                                                                             | 90.929                                                                                            | -                                                                             | 90.388                                                                                     | 63.498                                                                        | 89.882                                                                          | 91.758                                                          | 101.200                                                        |
| $\beta$ [°]                                                                | 93.070                                                                                        | 94.484                                                                                            | -                                                                             | 92.939                                                                                     | 89.529                                                                        | 75.612                                                                          | 106.550                                                         | 94.535                                                         |
| $\gamma$ [°]                                                               | -                                                                                             | 109.056                                                                                           | -                                                                             | 104.379                                                                                    | 78.900                                                                        | 87.569                                                                          | 111.386                                                         | 98.737                                                         |
| <i>V</i> [Å <sup>3</sup> ]                                                 | 7817.7                                                                                        | 2028.38                                                                                           | 5049.6                                                                        | 2079.4                                                                                     | 2321.0                                                                        | 4240.4                                                                          | 1378.09                                                         | 1199.2                                                         |
| <i>Z</i>                                                                   | 4                                                                                             | 1                                                                                                 | 8                                                                             | 2                                                                                          | 2                                                                             | 2                                                                               | 2                                                               | 2                                                              |
| <i>D</i> <sub>calc</sub> (g cm <sup>-3</sup> )                             | 1.378                                                                                         | 1.365                                                                                             | 1.346                                                                         | 1.349                                                                                      | 1.372                                                                         | 1.374                                                                           | 1.320                                                           | 1.367                                                          |
| No. measd. reflections                                                     | 61477                                                                                         | 14111                                                                                             | 12255                                                                         | 13966                                                                                      | 16048                                                                         | 29421                                                                           | 10990                                                           | 7812                                                           |
| no. unique reflections ( <i>R</i> <sub>int</sub> )                         | 18760 (0.0554)                                                                                | 10209 (0.022)                                                                                     | 6663 (0.0434)                                                                 | 7590 (0.0847)                                                                              | 8466 (0.0424)                                                                 | 15455 (0.0711)                                                                  | 6319 (0.0237)                                                   | 4380 (0.1038)                                                  |
| No. obs. reflections                                                       | 9987                                                                                          | 4901                                                                                              | 5140                                                                          | 3352                                                                                       | 5145                                                                          | 8578                                                                            | 3663                                                            | 1141                                                           |
| Final <i>R</i> <sub>1</sub> , <i>wR</i> <sub>2</sub><br>(obs. reflections) | 0.1057, 0.2481                                                                                | 0.076, 0.2136                                                                                     | 0.0848, 0.2562                                                                | 0.1339, 0.3515                                                                             | 0.0714, 0.1854                                                                | 0.0711, 0.1742                                                                  | 0.0627, 0.1477                                                  | 0.0577, 0.0792                                                 |
| Goodness-of-fit<br>(obs. reflections)                                      | 1.023                                                                                         | 1.082                                                                                             | 1.063                                                                         | 1.113                                                                                      | 1.017                                                                         | 0.987                                                                           | 1.014                                                           | 0.709                                                          |



**Table S6.** Crystallographic data of the supramolecular salts of nor (2/2).

| Compound                                                                   | (nor <sup>+</sup> ) <sub>2</sub> (az <sup>2-</sup> )·az·4H <sub>2</sub> O | (nor <sup>+</sup> ) <sub>2</sub> (seb <sup>2-</sup> )·4CH <sub>3</sub> OH | (nor <sup>+</sup> )(seb <sup>-</sup> )nor·H <sub>2</sub> O                      | (nor <sup>+</sup> ) <sub>2</sub> (adi <sup>2-</sup> )·2H <sub>2</sub> O<br>form I | (nor <sup>+</sup> ) <sub>2</sub> (adi <sup>2-</sup> )·2H <sub>2</sub> O<br>form II | (nor <sup>+</sup> ) <sub>2</sub> (seb <sup>2-</sup> )·3H <sub>2</sub> O          |
|----------------------------------------------------------------------------|---------------------------------------------------------------------------|---------------------------------------------------------------------------|---------------------------------------------------------------------------------|-----------------------------------------------------------------------------------|------------------------------------------------------------------------------------|----------------------------------------------------------------------------------|
| Formula                                                                    | C <sub>25</sub> H <sub>39</sub> FN <sub>3</sub> O <sub>9.6</sub>          | C <sub>23</sub> H <sub>35</sub> FN <sub>3</sub> O <sub>7</sub>            | C <sub>42</sub> H <sub>55.5</sub> F <sub>2</sub> N <sub>6</sub> O <sub>11</sub> | C <sub>19</sub> H <sub>27</sub> FN <sub>3</sub> O <sub>7</sub>                    | C <sub>19</sub> H <sub>25</sub> FN <sub>3</sub> O <sub>6</sub>                     | C <sub>42</sub> H <sub>54</sub> F <sub>2</sub> N <sub>6</sub> O <sub>16.50</sub> |
| <i>M<sub>r</sub></i>                                                       | 554.19                                                                    | 484.54                                                                    | 858.42                                                                          | 428.43                                                                            | 410.42                                                                             | 944.91                                                                           |
| Habit                                                                      | Plate                                                                     | Plate                                                                     | Block                                                                           | Block                                                                             | Needle                                                                             | Plate                                                                            |
| Size (mm)                                                                  | 0.4 x 0.2 x 0.2                                                           | 0.5 x 0.3 x 0.1                                                           | 0.5 x 0.2 x 0.2                                                                 | 0.6 x 0.5 x 0.4                                                                   | 0.8 x 0.15 x 0.1                                                                   | 0.5 x 0.3 0.2                                                                    |
| Crystal system                                                             | Monoclinic                                                                | Monoclinic                                                                | Triclinic                                                                       | Triclinic                                                                         | Triclinic                                                                          | Triclinic                                                                        |
| Space group                                                                | P2 <sub>1</sub> /n                                                        | C2/c                                                                      | P-1                                                                             | P-1                                                                               | P-1                                                                                | P-1                                                                              |
| Unit cell dimensions                                                       |                                                                           |                                                                           |                                                                                 |                                                                                   |                                                                                    |                                                                                  |
| <i>a</i> [Å]                                                               | 9.3287                                                                    | 42.543                                                                    | 9.6354                                                                          | 7.2502                                                                            | 6.8861                                                                             | 7.4605                                                                           |
| <i>b</i> [Å]                                                               | 22.9608                                                                   | 6.8319                                                                    | 11.1605                                                                         | 11.2327                                                                           | 9.7466                                                                             | 11.2181                                                                          |
| <i>c</i> [Å]                                                               | 25.1702                                                                   | 17.295                                                                    | 21.3064                                                                         | 12.8744                                                                           | 15.4257                                                                            | 14.8638                                                                          |
| $\alpha$ [°]                                                               | -                                                                         | -                                                                         | 96.888                                                                          | 87.992                                                                            | 82.400                                                                             | 103.595                                                                          |
| $\beta$ [°]                                                                | 90.289                                                                    | 97.421                                                                    | 98.719                                                                          | 75.520                                                                            | 86.148                                                                             | 99.497                                                                           |
| $\gamma$ [°]                                                               | -                                                                         | -                                                                         | 111.392                                                                         | 87.474                                                                            | 69.953                                                                             | 92.348                                                                           |
| <i>V</i> [Å <sup>3</sup> ]                                                 | 5391.3                                                                    | 4987.7                                                                    | 2070.1                                                                          | 1013.88                                                                           | 963.78                                                                             | 1188.43                                                                          |
| <i>Z</i>                                                                   | 8                                                                         | 8                                                                         | 2                                                                               | 2                                                                                 | 2                                                                                  | 1                                                                                |
| <i>D</i> <sub>calc</sub> (g cm <sup>-3</sup> )                             | 1.366                                                                     | 1.291                                                                     | 1.377                                                                           | 1.403                                                                             | 1.414                                                                              | 1.320                                                                            |
| No. measd. reflections                                                     | 16452                                                                     | 16190                                                                     | 13468                                                                           | 6722                                                                              | 7179                                                                               | 7759                                                                             |
| no. unique reflections ( <i>R</i> <sub>int</sub> )                         | 9750 (0.0236)                                                             | 4556 (0.0507)                                                             | 7548 (0.0468)                                                                   | 3715 (0.0185)                                                                     | 4393 (0.0315)                                                                      | 4325(0.0262)                                                                     |
| No. obs. reflections                                                       | 6665                                                                      | 2564                                                                      | 3072                                                                            | 2745                                                                              | 3065                                                                               | 3042                                                                             |
| Final <i>R</i> <sub>1</sub> , <i>wR</i> <sub>2</sub><br>(obs. reflections) | 0.0584, 0.1469                                                            | 0.0618, 0.1459                                                            | 0.0996, 0.2166                                                                  | 0.0454 0.1096                                                                     | 0.0639, 0.1761                                                                     | 0.0591, 0.1700                                                                   |
| Goodness-of-fit<br>(obs. reflections)                                      | 0.947                                                                     | 1.013                                                                     | 1.038                                                                           | 0.999                                                                             | 0.984                                                                              | 0.935                                                                            |

**Table S7.** Crystallographic data of the supramolecular salts of cip.

| Compound                                                                   | (cip <sup>+</sup> )(glu <sup>-</sup> )                                        | (cip <sup>+</sup> )(pim <sup>-</sup> )                         | (cip <sup>+</sup> ) <sub>2</sub> (pim <sup>2-</sup> )·H <sub>2</sub> O | (cip <sup>+</sup> ) <sub>2</sub> (sub <sup>2-</sup> )·4H <sub>2</sub> O | (cip <sup>+</sup> )(az <sup>-</sup> )·CH <sub>3</sub> CN       |
|----------------------------------------------------------------------------|-------------------------------------------------------------------------------|----------------------------------------------------------------|------------------------------------------------------------------------|-------------------------------------------------------------------------|----------------------------------------------------------------|
| Formula                                                                    | C <sub>44</sub> H <sub>52</sub> F <sub>2</sub> N <sub>6</sub> O <sub>14</sub> | C <sub>24</sub> H <sub>30</sub> FN <sub>3</sub> O <sub>7</sub> | C <sub>20.5</sub> H <sub>24</sub> FN <sub>3</sub> O <sub>7</sub>       | C <sub>21</sub> H <sub>29</sub> FN <sub>3</sub> O <sub>7</sub>          | C <sub>28</sub> H <sub>37</sub> FN <sub>4</sub> O <sub>7</sub> |
| <i>M<sub>r</sub></i>                                                       | 926.91                                                                        | 491.51                                                         | 443.43                                                                 | 454.47                                                                  | 560.61                                                         |
| Habit                                                                      | Plate                                                                         | Needle                                                         | Needle                                                                 | Needle                                                                  | Block                                                          |
| Size                                                                       | 0.3 x 0.2 x 0.2                                                               | 0.4 x 0.25 x 0.2                                               | 0.8 x 0.5 x 0.2                                                        | 0.75 x 0.15 x 0.05                                                      | 0.4 x 0.4 x 0.3                                                |
| Crystal system                                                             | Triclinic                                                                     | Orthorhombic                                                   | Monoclinic                                                             | Triclinic                                                               | Triclinic                                                      |
| Space group                                                                | P-1                                                                           | Pbca                                                           | C2/c                                                                   | P-1                                                                     | P-1                                                            |
| Unit cell dimensions                                                       |                                                                               |                                                                |                                                                        |                                                                         |                                                                |
| <i>a</i> [Å]                                                               | 7.1811                                                                        | 8.4398                                                         | 24.9174                                                                | 7.4801                                                                  | 9.9902                                                         |
| <i>b</i> [Å]                                                               | 16.5398                                                                       | 23.4988                                                        | 7.1174                                                                 | 11.4803                                                                 | 12.1238                                                        |
| <i>c</i> [Å]                                                               | 18.8198                                                                       | 24.002                                                         | 24.5887                                                                | 13.2385                                                                 | 12.6545                                                        |
| $\alpha$ [°]                                                               | 93.924                                                                        | -                                                              | -                                                                      | 94.096                                                                  | 71.432                                                         |
| $\beta$ [°]                                                                | 99.728                                                                        | -                                                              | 95.082                                                                 | 102.254                                                                 | 82.750                                                         |
| $\gamma$ [°]                                                               | 90.242                                                                        | -                                                              | -                                                                      | 95.417                                                                  | 78.192                                                         |
| <i>V</i> [Å <sup>3</sup> ]                                                 | 2197.71                                                                       | 4760.2                                                         | 4343.6                                                                 | 1101.08                                                                 | 1419.09                                                        |
| <i>Z</i>                                                                   | 2                                                                             | 8                                                              | 8                                                                      | 2                                                                       | 2                                                              |
| <i>D</i> <sub>calc</sub> (g cm <sup>-3</sup> )                             | 1.401                                                                         | 1.372                                                          | 1.356                                                                  | 1.371                                                                   | 1.312                                                          |
| No. measd. reflections                                                     | 15549                                                                         | 16697                                                          | 14898                                                                  | 6827                                                                    | 11555                                                          |
| no. unique reflections ( <i>R</i> <sub>int</sub> )                         | 8047 (0.0530)                                                                 | 16697 (0.1218)                                                 | 3977 (0.0237)                                                          | 4008 (0.0192)                                                           | 6591 (0.0192)                                                  |
| No. obs. reflections                                                       | 3185                                                                          | 7570                                                           | 2987                                                                   | 2855                                                                    | 4149                                                           |
| Final <i>R</i> <sub>1</sub> , <i>wR</i> <sub>2</sub><br>(obs. reflections) | 0.0568, 0.0850                                                                | 0.1137, 0.2069                                                 | 0.0747, 0.2041                                                         | 0.0481, 0.1197                                                          | 0.0540, 0.1187                                                 |
| Goodness-of-fit (obs. reflections)                                         | 0.893                                                                         | 1.022                                                          | 1.016                                                                  | 0.929                                                                   | 0.993                                                          |

**Table S8.** Crystallographic data of the enro solvates.

| <b>Compound</b>                                                            | <b>enro·CH<sub>3</sub>CN</b>                                   | <b>enro·H<sub>2</sub>O</b>                                     |
|----------------------------------------------------------------------------|----------------------------------------------------------------|----------------------------------------------------------------|
| Formula                                                                    | C <sub>21</sub> H <sub>25</sub> FN <sub>4</sub> O <sub>3</sub> | C <sub>19</sub> H <sub>24</sub> FN <sub>3</sub> O <sub>4</sub> |
| <i>M<sub>r</sub></i>                                                       | 400.45                                                         | 377.41                                                         |
| Crystal system                                                             | Monoclinic                                                     | Monoclinic                                                     |
| Space group                                                                | P2 <sub>1</sub> /c                                             | P2 <sub>1</sub> /n                                             |
| Unit cell dimensions                                                       |                                                                |                                                                |
| <i>a</i> [Å]                                                               | 13.6993                                                        | 9.988                                                          |
| <i>b</i> [Å]                                                               | 7.7470                                                         | 7.0869                                                         |
| <i>c</i> [Å]                                                               | 19.2496                                                        | 25.637                                                         |
| $\alpha$ [°]                                                               | 90                                                             | 90                                                             |
| $\beta$ [°]                                                                | 103.303                                                        | 95.35                                                          |
| $\gamma$ [°]                                                               | 90                                                             | 90                                                             |
| <i>V</i> [Å <sup>3</sup> ]                                                 | 1988.1                                                         | 1806.7                                                         |
| <i>Z</i>                                                                   | 4                                                              | 4                                                              |
| <i>D</i> <sub>calc</sub> (g cm <sup>-3</sup> )                             | 1.338                                                          | 1.388                                                          |
| No. measd. reflections                                                     | 16614                                                          | 15082                                                          |
| no. unique reflections ( <i>R</i> <sub>int</sub> )                         | 4831 (0.0459)                                                  | 4351 (0.0849)                                                  |
| No. obs. reflections                                                       | 3155                                                           | 1644                                                           |
| <i>Final R</i> <sub>1</sub> , <i>wR</i> <sub>2</sub><br>(obs. reflections) | 0.0602, 0.1517                                                 | 0.0753, 0.1294                                                 |
| Goodness-of-fit (obs.<br>reflections)                                      | 1.044                                                          | 0.926                                                          |

**Table S9.** H bonding interactions in the salts of nor, cip and enro and carboxylic acids HOOC-(CH<sub>2</sub>)<sub>n</sub>-COOH (n = 3 – 8).

|                                                                                         | D-H...A              | d(D...A) (Å) | ∠(DHA) (°) | symmetry code       |
|-----------------------------------------------------------------------------------------|----------------------|--------------|------------|---------------------|
| (enro <sup>+</sup> )(glu <sup>-</sup> )·0.33CH <sub>3</sub> CN<br>·0.67H <sub>2</sub> O | N(1)-H(1N1)...O(4)   | 2.710(4)     | 167(4)     |                     |
|                                                                                         | N(7)-H(1N7)...O(11)  | 2.699(4)     | 163(5)     |                     |
|                                                                                         | N(7)-H(1N7)...O(12)  | 3.190(6)     | 138(4)     |                     |
|                                                                                         | N(4)-H(1N4)...O(6)   | 2.710(4)     | 168(3)     |                     |
|                                                                                         | O(9)-H(1O9)...O(6)   | 2.543(4)     | 175(5)     |                     |
|                                                                                         | O(8)-H(1O8)...O(11)  | 2.541(4)     | 164(6)     |                     |
|                                                                                         | O(20)-H(1O3)...O(21) | 2.545(5)     | 156(5)     |                     |
|                                                                                         | O(17)-H(1O1)...O(18) | 2.558(5)     | 152(5)     |                     |
|                                                                                         | O(14)-H(1O4)...O(15) | 2.550(5)     | 160(5)     |                     |
|                                                                                         | O(2)-H(1O2)...O(4)   | 2.539(5)     | 161(6)     | x-1,-y+2,-z         |
| (enro <sup>+</sup> ) <sub>2</sub> (adi <sup>2-</sup> )·adi·2CH <sub>3</sub> CN          | O(1)-H(1)...O(3)     | 2.519(3)     | 153.1      |                     |
|                                                                                         | O(5)-H(1O5)...O(6)   | 2.558(3)     | 164(4)     |                     |
|                                                                                         | N(1)-H(1N1)...O(6)   | 2.640(3)     | 170(4)     |                     |
|                                                                                         | N(1)-H(1N1)...O(7)   | 3.255(3)     | 132(3)     |                     |
| (enro <sup>+</sup> ) <sub>2</sub> (pim <sup>2-</sup> )·1.5H <sub>2</sub> O              | O(2)-H(1O2)...O(3)   | 2.533(4)     | 156(6)     |                     |
|                                                                                         | N(3)-H(1N3)...O(4)   | 2.592(4)     | 170(8)     |                     |
|                                                                                         | N(3)-H(1N3)...O(5)   | 3.249(4)     | 131(6)     |                     |
| (enro <sup>+</sup> )(pim <sup>-</sup> )·H <sub>2</sub> O                                | O(4)-H(4)...O(7)     | 2.633(5)     | 150.6      | -x+1,-y+1,-z        |
|                                                                                         | N(1)-H(1N1)...O(6)   | 2.592(5)     | 171(4)     |                     |
|                                                                                         | N(1)-H(1N1)...O(7)   | 3.152(5)     | 126(3)     |                     |
|                                                                                         | O(2)-H(1O2)...O(3)   | 2.530(4)     | 148(5)     |                     |
|                                                                                         | O(8)-H(1O8)...O(1)   | 2.962(4)     | 171(8)     | -x+1,-y+1,-z+1      |
|                                                                                         | O(8)-H(2O8)...O(6)   | 2.793(5)     | 164(3)     |                     |
| (enro <sup>+</sup> )(pim <sup>-</sup> )·3H <sub>2</sub> O                               | O(8)-H(1O8)...O(5)   | 2.926(2)     | 168(3)     | -x+2,-y+1,-z+1      |
|                                                                                         | O(8)-H(2O8)...O(5)   | 2.792(2)     | 178(3)     |                     |
|                                                                                         | O(10)-H(1O1)...O(9)  | 2.867(3)     | 178(4)     |                     |
|                                                                                         | O(10)-H(2O1)...O(4)  | 2.932(2)     | 171(3)     | x-1/2,y+1/2,z       |
|                                                                                         | O(9)-H(1O9)...O(1)   | 2.755(2)     | 163(3)     |                     |
|                                                                                         | O(9)-H(2O9)...O(8)   | 2.812(2)     | 177(3)     | -x+3/2,-y+1/2,-z+1  |
|                                                                                         | N(1)-H(1N1)...O(1)   | 2.703(2)     | 172(2)     |                     |
|                                                                                         | O(6)-H(1O6)...O(7)   | 2.480(2)     | 158(3)     |                     |
|                                                                                         | O(4)-H(1O4)...O(2)   | 2.502(2)     | 178(3)     | -x+3/2,y-1/2,-z+3/2 |
|                                                                                         | O(2)-H(2)...O(3)     | 2.544(5)     | 146.2      |                     |
| (enro <sup>+</sup> )(sub <sup>-</sup> )·H <sub>2</sub> O                                | N(1)-H(1N1)...O(4)   | 2.658(4)     | 175(3)     |                     |
|                                                                                         | O(7)-H(1O7)...O(4)   | 2.555(4)     | 168(5)     | x+1,y+1,z           |
| (enro <sup>+</sup> )(az <sup>-</sup> )                                                  | N(1)-H(1N1)...O(5)   | 2.6391(18)   | 172(2)     |                     |
|                                                                                         | N(1)-H(1N1)...O(4)   | 3.318(2)     | 129.9(17)  |                     |
|                                                                                         | O(2)-H(1O2)...O(3)   | 2.5252(17)   | 162(3)     |                     |
|                                                                                         | O(7)-H(1O7)...O(4)   | 2.542(2)     | 172(3)     | -x+2,-y+2,-z+1      |

|                                                                                           |                                                                                               |                  |           |                |
|-------------------------------------------------------------------------------------------|-----------------------------------------------------------------------------------------------|------------------|-----------|----------------|
| (enor <sup>+</sup> )(seb <sup>-</sup> )                                                   | N(4)-H(1N4)...O(3)                                                                            | 3.197(3)         | 121(2)    |                |
|                                                                                           | N(4)-H(1N4)...O(4)                                                                            | 2.635(3)         | 178(3)    |                |
|                                                                                           | O(1)-H(1O1)...O(4)                                                                            | 2.599(3)         | 169(3)    | x-1,y,z        |
|                                                                                           | N(1)-H(1N1)...O(5)                                                                            | 2.622(3)         | 170(3)    |                |
|                                                                                           | N(1)-H(1N1)...O(6)                                                                            | 3.067(3)         | 128(2)    |                |
|                                                                                           | O(10)-H(1O2)...O(11)                                                                          | 2.540(2)         | 157(3)    |                |
|                                                                                           | O(13)-H(1O3)...O(14)                                                                          | 2.550(3)         | 153(3)    |                |
|                                                                                           | O(8)-H(1O8)...O(6)                                                                            | 2.509(3)         | 168(3)    | x+1,y,z        |
| (nor <sup>+</sup> ) <sub>2</sub> (glu <sup>2-</sup> )·H <sub>2</sub> O·CH <sub>3</sub> OH | O(22)-H(22)...O(9)                                                                            | 2.789(6)         | 167.8     |                |
|                                                                                           | O(23)-H(23)...O(8)                                                                            | 2.719(6)         | 161.5     |                |
|                                                                                           | C(71)-H(71)...O(13)                                                                           | 3.320(5)         | 146.6     | -x+2,-y+1,-z+2 |
|                                                                                           | O(2)-H(1O2)...O(3)                                                                            | 2.511(4)         | 150(5)    |                |
|                                                                                           | O(12)-H(1O1)...O(11)                                                                          | 2.514(4)         | 148(7)    |                |
|                                                                                           | O(15)-H(1O3)...O(14)                                                                          | 2.505(4)         | 142(5)    |                |
|                                                                                           | N(3)-H(1N3)...O(8)                                                                            | 2.713(5)         | 178(5)    |                |
|                                                                                           | N(3)-H(2N3)...O(20)                                                                           | 2.749(6)         | 174(5)    | x,y,z-1        |
|                                                                                           | N(12)-H(1N2)...O(19)                                                                          | 2.687(5)         | 164(4)    | x,y,z-1        |
|                                                                                           | N(12)-H(2N2)...O(7)                                                                           | 2.693(5)         | 166(5)    |                |
|                                                                                           | N(7)-H(1N7)...O(9)                                                                            | 2.677(5)         | 161(6)    |                |
|                                                                                           | N(7)-H(2N7)...O(17)                                                                           | 2.700(7)         | 175(5)    |                |
|                                                                                           | O(5)-H(1O5)...O(6)                                                                            | 2.518(4)         | 151(5)    |                |
|                                                                                           | N(6)-H(1N6)...O(18)                                                                           | 2.703(6)         | 166(7)    |                |
|                                                                                           | N(6)-H(2N6)...O(10)                                                                           | 2.722(6)         | 176(8)    |                |
|                                                                                           | (nor <sup>+</sup> ) <sub>2</sub> (glu <sup>2-</sup> )·H <sub>2</sub> O·0.75CH <sub>3</sub> CN | O(2)-H(2)...O(3) | 2.515(9)  | 146.9          |
| O(8)-H(8)...O(9)                                                                          |                                                                                               | 2.510(10)        | 153.4     |                |
| O(11)-H(11)...O(12)                                                                       |                                                                                               | 2.519(10)        | 148.0     |                |
| N(3)-H(3A)...O(18)                                                                        |                                                                                               | 2.590(11)        | 170.3     |                |
| N(3)-H(3B)...O(22)                                                                        |                                                                                               | 2.693(12)        | 171.0     | x-1,y-1,z      |
| N(4)-H(4B)...O(17)                                                                        |                                                                                               | 2.678(11)        | 171.8     |                |
| N(4)-H(4A)...O(20)                                                                        |                                                                                               | 2.786(10)        | 151.3     | x-1,y-1,z      |
| N(7)-H(7A)...O(23)                                                                        |                                                                                               | 2.745(12)        | 174.3     | x-1,y-1,z      |
| N(7)-H(7B)...O(16)                                                                        |                                                                                               | 2.784(14)        | 169.3     |                |
| N(10)-H(10A)...O(15)                                                                      |                                                                                               | 2.725(12)        | 172.3     |                |
| N(10)-H(10B)...O(13)                                                                      |                                                                                               | 2.688(10)        | 147.4     | x-1,y-1,z      |
| N(10)-H(10B)...O(14)                                                                      | 3.487(15)                                                                                     | 152.1            | x-1,y-1,z |                |
| (nor <sup>+</sup> )(pim <sup>-</sup> )·CH <sub>3</sub> OH                                 | O(1)-H(1)...O(3)                                                                              | 2.498(8)         | 154.1     |                |
|                                                                                           | O(14)-H(14)...O(11)#1                                                                         | 2.501(10)        | 140.4     | x-1/2,-y,z     |
|                                                                                           | N(4)-H(4A)...O(13)#2                                                                          | 2.780(11)        | 160.5     | x+1/2,-y+1,z   |
|                                                                                           | N(4)-H(4B)...O(11)                                                                            | 2.691(10)        | 155.3     |                |
|                                                                                           | N(4)-H(4B)...O(12)                                                                            | 3.362(13)        | 146.8     |                |
|                                                                                           | O(2X)-H(2X)...O(5)                                                                            | 2.650(11)        | 143.8     |                |
|                                                                                           | O(1X)-H(1X)...O(12)                                                                           | 2.708(13)        | 158.5     |                |
|                                                                                           | N(1)-H(1N1)...O(4)                                                                            | 2.661(11)        | 131(10)   |                |
|                                                                                           | N(1)-H(1N1)...O(5)                                                                            | 3.365(11)        | 161(9)    |                |
|                                                                                           | N(1)-H(2N1)...O(6)#7                                                                          | 2.808(11)        | 152(9)    | x-1/2,-y+1,z   |
|                                                                                           | O(7)-H(1O7)...O(4)#9                                                                          | 2.537(9)         | 162(11)   | x+1/2,-y,z     |
|                                                                                           | O(8)-H(1O8)...O(10)                                                                           | 2.512(8)         | 149(11)   |                |
|                                                                                           | <u>(nor<sup>+</sup>)<sub>2</sub>(pim<sup>2-</sup>)·C<sub>2</sub>H<sub>5</sub>OH</u>           | O(2)-H(2)...O(3) | 2.487(6)  | 155.0          |

|                                                                          |                      |          |        |                |
|--------------------------------------------------------------------------|----------------------|----------|--------|----------------|
|                                                                          | O(9)-H(9)...O(10)    | 2.530(5) | 153.3  |                |
|                                                                          | N(3)-H(3BX)...O(4)   | 2.708(6) | 172.1  | x,y-1,z        |
|                                                                          | N(3)-H(3BX)...O(5A)  | 3.30(3)  | 133.4  | x,y-1,z        |
|                                                                          | N(4)-H(4AX)...O(6)   | 2.612(6) | 169.3  | x,y+1,z        |
|                                                                          | N(4)-H(4BX)...O(4)   | 2.668(7) | 165.7  |                |
| (nor <sup>+</sup> )(pim <sup>-</sup> )                                   | O(2)-H(1O2)...O(3)   | 2.539(3) | 156(6) |                |
|                                                                          | O(2)-H(1O2)...O(14)  | 2.969(3) | 110(4) | x+1,y-2,z+1    |
|                                                                          | O(13)-H(1O3)...O(14) | 2.534(3) | 167(5) |                |
|                                                                          | N(3)-H(1N3)...O(4)   | 2.668(3) | 177(3) |                |
|                                                                          | N(3)-H(2N3)...O(9)   | 2.701(4) | 170(4) | -x+1,-y+1,-z+1 |
|                                                                          | N(4)-H(1N4)...O(5)   | 2.873(4) | 129(3) |                |
|                                                                          | N(4)-H(1N4)...O(6)   | 2.943(4) | 132(3) | -x+1,-y+1,-z+1 |
|                                                                          | N(4)-H(2N4)...O(8)   | 2.897(4) | 134(3) | -x+1,-y+1,-z+1 |
|                                                                          | N(4)-H(2N4)...O(11)  | 2.999(4) | 128(3) | x-1,y-1,z+1    |
| (nor <sup>+</sup> ) <sub>2</sub> (sub <sup>2-</sup> )·CH <sub>3</sub> OH | O(23)-H(23)...O(11)  | 2.785(4) | 169.6  |                |
|                                                                          | O(22)-H(22)...O(5)   | 2.714(4) | 165.0  |                |
|                                                                          | O(21)-H(21)...N(3)   | 3.123(5) | 139.1  |                |
|                                                                          | O(24)-H(24)...N(5)   | 3.208(5) | 135.4  |                |
|                                                                          | N(3)-H(1N3)...O(7)   | 2.695(3) | 159(4) |                |
|                                                                          | N(3)-H(1N3)...O(21)  | 3.123(5) | 118(3) |                |
|                                                                          | N(3)-H(2N3)...O(5)   | 2.614(4) | 159(3) |                |
|                                                                          | N(5)-H(1N5)...O(11)  | 2.651(3) | 161(4) |                |
|                                                                          | N(5)-H(2N5)...O(13)  | 2.602(4) | 155(4) |                |
|                                                                          | N(8)-H(1N8)...O(6)   | 2.628(4) | 167(4) |                |
|                                                                          | N(8)-H(2N8)...O(4)   | 2.788(3) | 161(3) |                |
|                                                                          | N(8)-H(2N8)...O(23)  | 3.064(4) | 111(3) | -x+1,-y+1,-z+1 |
|                                                                          | N(11)-H(1N1)...O(12) | 2.711(4) | 149(3) |                |
|                                                                          | N(11)-H(1N1)...O(22) | 3.173(4) | 120(3) | -x+2,-y+1,-z+1 |
|                                                                          | N(11)-H(2N2)...O(14) | 2.665(4) | 152(5) |                |
|                                                                          | O(8)-H(1O8)...O(10)  | 2.568(4) | 154(6) |                |
|                                                                          | O(2)-H(1O2)...O(3)   | 2.535(4) | 156(5) |                |
|                                                                          | O(19)-H(1O1)...O(20) | 2.556(4) | 155(4) |                |
|                                                                          | O(17)-H(1O7)...O(16) | 2.520(3) | 165(7) |                |
| (nor <sup>+</sup> )(sub <sup>-</sup> )·3H <sub>2</sub> O                 | O(6)-H(6)...O(5)     | 2.509(2) | 169.7  | x,y-1,z        |
|                                                                          | N(3)-H(1N3)...O(9)   | 2.832(3) | 166(3) | -x+2,-y+2,-z+1 |
|                                                                          | N(3)-H(2N3)...O(4)   | 2.735(3) | 162(2) |                |
|                                                                          | O(2)-H(1O2)...O(3)   | 2.541(2) | 158(4) |                |
|                                                                          | O(2)-H(1O2)...O(3)   | 3.052(2) | 114(3) | -x-1,-y+2,-z   |
|                                                                          | O(10)-H(1O1)...O(4)  | 2.791(3) | 177(5) |                |
|                                                                          | O(10)-H(2O1)...O(8)  | 3.115(5) | 158(4) | -x+2,-y+1,-z+1 |
|                                                                          | O(9)-H(1O9)...O(5)   | 2.745(3) | 176(3) |                |
|                                                                          | O(9)-H(2O9)...O(8)   | 2.909(4) | 168(4) | -x+3,-y+1,-z+1 |
|                                                                          | O(8)-H(2O8)...O(7)   | 2.790(3) | 169(5) |                |
|                                                                          | O(8)-H(1O8)...O(10)  | 2.840(4) | 158(4) | x+1,y,z        |
| (nor <sup>+</sup> )(sub <sup>-</sup> )                                   | N(1)-H(1N1)...O(4)   | 2.617(7) | 162(6) |                |
|                                                                          | N(1)-H(2N1)...O(5)#6 | 2.854(6) | 173(6) | x-1,y-1,z      |
|                                                                          | O(6)-H(1O6)...O(7)   | 2.507(6) | 157(9) |                |
|                                                                          | O(1)-H(1O1)...O(4)#6 | 2.526(4) | 169(6) | x-1,y-1,z      |

|                                                                                  |                                                             |                     |              |                     |
|----------------------------------------------------------------------------------|-------------------------------------------------------------|---------------------|--------------|---------------------|
| (nor <sup>+</sup> ) <sub>2</sub> (az <sup>2-</sup> )·az·4H <sub>2</sub> O        | N(3)-H(3A)...O(4)                                           | 2.750(3)            | 172.6        |                     |
|                                                                                  | N(3)-H(3B)...O(7)                                           | 2.784(3)            | 162.2        | -x+1/2,y-1/2,-z+1/2 |
|                                                                                  | N(6)-H(6A)...O(9)                                           | 2.764(3)            | 174.3        | -x+3/2,y+1/2,-z+1/2 |
|                                                                                  | N(6)-H(6B)...O(11)                                          | 2.759(3)            | 159.1        |                     |
|                                                                                  | O(19)-H(19A)...O(4)                                         | 2.804(3)            | 178(4)       |                     |
|                                                                                  | O(19)-H(19B)...O(9)                                         | 2.831(3)            | 179(4)       | -x-1/2,y-1/2,-z+1/2 |
|                                                                                  | O(5)-H(105)...O(10)                                         | 2.471(2)            | 176(6)       | x-1,y-1,z           |
|                                                                                  | O(17)-H(17A)...O(7)                                         | 2.793(3)            | 173(4)       |                     |
|                                                                                  | O(18)-H(18A)...O(19)                                        | 2.888(3)            | 168(4)       | x+1,y,z             |
|                                                                                  | O(18)-H(18B)...O(17)                                        | 2.867(4)            | 163(4)       |                     |
|                                                                                  | O(15)-H(15C)...O(11)                                        | 2.808(3)            | 173(4)       |                     |
|                                                                                  | O(15)-H(15D)...O(3)                                         | 2.866(4)            | 171(4)       | x+5/2,-y+1/2,z-1/2  |
|                                                                                  | O(16)-H(16C)...O(15)                                        | 2.797(4)            | 176(5)       |                     |
|                                                                                  | O(16)-H(16D)...O(19)                                        | 2.880(4)            | 172(4)       | -x+1/2,y+1/2,-z+1/2 |
|                                                                                  | O(6)-H(6C)...O(8)                                           | 2.463(3)            | 170(6)       |                     |
|                                                                                  | O(6)-H(6C)...O(9)                                           | 3.124(3)            | 127(5)       |                     |
|                                                                                  | O(2)-H(2A)...O(12)                                          | 3.158(3)            | 113(3)       | x-7/2,-y+1/2,z+1/2  |
|                                                                                  | O(2)-H(2A)...O(1)                                           | 2.507(3)            | 161(4)       |                     |
|                                                                                  | O(14)-H(14C)...O(12)                                        | 2.502(3)            | 158(5)       |                     |
|                                                                                  | O(17)-H(17B)...O(13)                                        | 2.951(4)            | 179(5)       | -x+3,-y+1,-z        |
| (nor <sup>+</sup> ) <sub>2</sub> (seb <sup>2-</sup> )·4CH <sub>3</sub> OH        | O(6)-H(6)...O(4)                                            | 2.751(4)            | 167.3        |                     |
|                                                                                  | O(7)-H(7)...O(5)                                            | 2.673(4)            | 170.2        |                     |
|                                                                                  | N(1)-H(1N1)...O(4)                                          | 2.726(4)            | 172(3)       |                     |
|                                                                                  | N(1)-H(1N1)...O(5)                                          | 3.232(4)            | 128(2)       |                     |
|                                                                                  | O(2)-H(1O2)...O(3)                                          | 2.504(3)            | 154(4)       |                     |
|                                                                                  | N(1)-H(2N1)...O(7)                                          | 2.743(4)            | 173(3)       | x,y-1,z             |
|                                                                                  | (nor <sup>+</sup> )(seb <sup>-</sup> )·nor·H <sub>2</sub> O | O(11)-H(108)...O(2) | 2.935(7)     | 171(8)              |
| O(11)-H(2O8)...O(7)                                                              |                                                             | 2.939(8)            | 167(8)       |                     |
| O(2)-H(1O2)...O(3)                                                               |                                                             | 2.482(5)            | 155(6)       |                     |
| N(4)-H(1N4)...O(6)                                                               |                                                             | 3.250(6)            | 130(7)       |                     |
| N(4)-H(1N4)...O(7)                                                               |                                                             | 2.645(6)            | 173(8)       |                     |
| N(4)-H(2N4)...O(6)                                                               |                                                             | 2.774(8)            | 150(6)       | -x+3,-y+1,-z+1      |
| O(9)-H(1O9)...O(8)                                                               |                                                             | 2.508(6)            | 160(9)       |                     |
| N(3)-H(1N3)...O(4)                                                               |                                                             | 3.211(6)            | 154(6)       |                     |
| N(3)-H(1N3)...O(5)                                                               |                                                             | 2.895(6)            | 148(6)       |                     |
| O(4)-H(1O4)...O(4)                                                               | 2.420(9)                                                    | 180.0(4)            | -x+1,-y+1,-z |                     |
| (nor <sup>+</sup> ) <sub>2</sub> (adi <sup>2-</sup> )·2H <sub>2</sub> O, form I  | N(3)-H(1N3)...O(5)                                          | 2.688(2)            | 160(2)       |                     |
|                                                                                  | N(3)-H(2N3)...O(7)                                          | 2.760(2)            | 172(2)       | -x+1,-y+1,-z        |
|                                                                                  | O(6)-H(1O6)...O(1)                                          | 2.980(2)            | 170(3)       | -x+1,-y,-z+1        |
|                                                                                  | O(6)-H(2O6)...O(5)                                          | 2.764(2)            | 170(3)       |                     |
|                                                                                  | O(7)-H(1O7)...O(4)                                          | 2.695(2)            | 174(3)       |                     |
|                                                                                  | O(7)-H(2O7)...O(5)                                          | 3.274(3)            | 148(3)       | -x+2,-y+1,-z        |
|                                                                                  | O(7)-H(2O7)...O(6)                                          | 3.140(3)            | 142(3)       | -x+2,-y+1,-z        |
| (nor <sup>+</sup> ) <sub>2</sub> (adi <sup>2-</sup> )·2H <sub>2</sub> O, form II | O(2)-H(1O2)...O(3)                                          | 2.524(3)            | 149(4)       |                     |
|                                                                                  | N(1)-H(1N1)...O(4)                                          | 2.724(3)            | 175(3)       |                     |
|                                                                                  | N(1)-H(2N1)...O(4)                                          | 3.082(3)            | 121(2)       | -x+1,-y+2,-z+2      |
|                                                                                  | N(1)-H(2N1)...O(5)                                          | 2.737(3)            | 170(3)       | -x+1,-y+2,-z+2      |

|                                                                         |                      |          |           |                     |
|-------------------------------------------------------------------------|----------------------|----------|-----------|---------------------|
|                                                                         | O(6)-H(106)...O(4)   | 2.815(3) | 175(4)    |                     |
|                                                                         | O(6)-H(206)...O(5)   | 2.904(3) | 159(4)    | x-1,y,z             |
| (nor <sup>+</sup> ) <sub>2</sub> (seb <sup>2-</sup> )·3H <sub>2</sub> O | N(2)-H(1N2)...O(7A)  | 2.820(5) | 168(3)    |                     |
|                                                                         | N(2)-H(1N2)...O(7B)  | 2.676(6) | 159(3)    |                     |
|                                                                         | N(2)-H(2N2)...O(4)   | 2.676(3) | 169(3)    |                     |
|                                                                         | O(2)-H(1O2)...O(3)   | 2.519(3) | 156(4)    |                     |
| (cip <sup>+</sup> )(glu <sup>-</sup> )                                  | O(7)-H(1O7)...O(9)   | 2.521(5) | 172(4)    |                     |
|                                                                         | O(12)-H(1O8)...O(14) | 2.526(5) | 165(5)    |                     |
|                                                                         | O(2)-H(1O2)...O(3)   | 2.531(4) | 155(4)    |                     |
|                                                                         | O(5)-H(1O5)...O(6)   | 2.521(4) | 149(4)    |                     |
|                                                                         | N(6)-H(1N6)...O(13)  | 2.712(5) | 179(6)    |                     |
|                                                                         | N(6)-H(2N6)...O(13)  | 2.968(5) | 155(3)    | -x+3,-y+1,-z+1      |
|                                                                         | N(6)-H(2N6)...O(14)  | 2.910(5) | 142(3)    | -x+3,-y+1,-z+1      |
|                                                                         | N(3)-H(1N3)...O(10)  | 2.715(4) | 173(3)    |                     |
|                                                                         | N(3)-H(2N3)...O(10)  | 2.776(4) | 159(3)    | -x,-y+1,-z          |
| (cip <sup>+</sup> )(pim <sup>-</sup> )                                  | O(7)-H(7A)...O(5)    | 2.425(6) | 165.9     | -x+5/2,y-1/2,z      |
|                                                                         | O(1)-H(1O1)...O(3)   | 2.536(8) | 158(8)    |                     |
|                                                                         | N(3)-H(1N3)...O(4)   | 2.810(7) | 168(6)    |                     |
|                                                                         | N(3)-H(2N3)...O(6)#7 | 2.809(8) | 170(7)    | -x+2,y+1/2,-z+1/2   |
| (cip <sup>+</sup> ) <sub>2</sub> (pim <sup>2-</sup> )·H <sub>2</sub> O  | N(1)-H(1N1)...O(1)   | 2.716(4) | 171(4)    |                     |
|                                                                         | N(1)-H(2N1)...O(1)   | 2.726(3) | 175(4)    | -x+1/2,y-1/2,-z+1/2 |
|                                                                         | N(1)-H(2N1)...O(2)   | 3.319(4) | 129(3)    | -x+1/2,y-1/2,-z+1/2 |
|                                                                         | O(4)-H(1O4)...O(3)   | 2.507(3) | 156(5)    |                     |
| (cip <sup>+</sup> ) <sub>2</sub> (sub <sup>2-</sup> )·4H <sub>2</sub> O | O(6)-H(1O6)...O(2)   | 2.774(3) | 159(3)    |                     |
|                                                                         | O(6)-H(2O6)...O(3)   | 2.941(3) | 166(4)    | -x+1,-y,-z+1        |
|                                                                         | O(7)-H(1O7)...O(1)   | 2.668(3) | 167(3)    |                     |
|                                                                         | O(7)-H(2O7)...O(6)   | 2.802(3) | 161(3)    | -x,-y+1,-z          |
|                                                                         | N(3)-H(1N3)...O(1)   | 2.618(2) | 168(3)    |                     |
|                                                                         | N(3)-H(2N3)...O(7)   | 2.686(3) | 177(3)    | -x+1,-y+1,-z        |
|                                                                         | O(4)-H(1O4)...O(5)   | 2.521(2) | 153(3)    |                     |
| (cip <sup>+</sup> )(az <sup>-</sup> )·CH <sub>3</sub> CN                | N(3)-H(1N3)...O(5)   | 2.737(3) | 161.9(19) |                     |
|                                                                         | N(3)-H(2N3)...O(6)   | 2.823(2) | 160(2)    | x,y+1,z             |
|                                                                         | N(3)-H(2N3)...O(7)   | 3.017(2) | 133(2)    | x,y+1,z             |
|                                                                         | O(2)-H(1O2)...O(1)   | 2.519(2) | 155(3)    |                     |
|                                                                         | O(6)-H(1O6)...O(4)   | 2.483(2) | 171(4)    | -x+1,-y+1,-z+1      |
|                                                                         | O(6)-H(1O6)...O(5)   | 3.150(2) | 117(3)    | -x+1,-y+1,-z+1      |



**Table S10.** Results of the screening of the fluoroquinolone salts for gelator properties by heating followed by slow cooling to room temperature (salt : solvent = 1 : 10 (w/w)).

| Co-former  | Solvent                               | Norfloxacin    |                | Ciprofloxacin  |                | Enrofloxacin   |                |
|------------|---------------------------------------|----------------|----------------|----------------|----------------|----------------|----------------|
|            |                                       | 1:1            | 2:1            | 1:1            | 2:1            | 1:1            | 2:1            |
| <b>Glu</b> | H <sub>2</sub> O                      | precipitate    | precipitate    | precipitate    | insoluble      | precipitate    | precipitate    |
|            | ethanol                               | insoluble      | insoluble      | insoluble      | insoluble      | insoluble      | precipitate    |
|            | PG                                    | gelatinous ppt | gel (8 – 10 %) | gel (6 – 10 %) | gelatinous ppt | precipitate    | gel (10 %)     |
|            | PEG                                   | insoluble      | insoluble      | insoluble      | insoluble      | gelatinous ppt | gelatinous ppt |
|            | methanol                              | precipitate    |                | insoluble      |                | gel (7 – 10 %) |                |
|            | CH <sub>3</sub> OH/CH <sub>3</sub> CN | precipitate    |                | insoluble      |                | precipitate    |                |
|            | acetonitrile                          | precipitate    |                | insoluble      |                | precipitate    |                |
|            | ethyl acetate                         | insoluble      |                | insoluble      |                | precipitate    |                |
| <b>Adi</b> | H <sub>2</sub> O                      | precipitate    | precipitate    | gel (5 – 10 %) | insoluble      | precipitate    | precipitate    |
|            | ethanol                               | insoluble      | insoluble      | insoluble      | insoluble      | precipitate    | precipitate    |
|            | PG                                    | gel (9 – 10 %) | gel (10 %)     | precipitate    | precipitate    | precipitate    | gel (10 %)     |
|            | PEG                                   | insoluble      | insoluble      | insoluble      | precipitate    | gelatinous ppt | gel (5-6%)     |
|            | methanol                              | insoluble      |                | insoluble      |                | precipitate    |                |
|            | CH <sub>3</sub> OH/CH <sub>3</sub> CN | insoluble      |                | insoluble      |                | precipitate    |                |
|            | acetonitrile                          | insoluble      |                | insoluble      |                | gelatinous ppt |                |
|            | ethyl acetate                         | insoluble      |                | insoluble      |                | insoluble      |                |
| <b>Pim</b> | H <sub>2</sub> O                      | precipitate    | gel (10 %)     | precipitate    | insoluble      | precipitate    | precipitate    |
|            | ethanol                               | insoluble      | precipitate    | insoluble      | Insoluble      | gelatinous ppt | precipitate    |
|            | PG                                    | gelatinous ppt | precipitate    | gelatinous ppt | precipitate    | gel (10 %)     | gel (10 %)     |
|            | PEG                                   | insoluble      | insoluble      | insoluble      | precipitate    | gelatinous ppt | gelatinous ppt |
|            | methanol                              | precipitate    |                | insoluble      |                | precipitate    |                |
|            | CH <sub>3</sub> OH/CH <sub>3</sub> CN | precipitate    |                | insoluble      |                | precipitate    |                |
|            | acetonitrile                          | insoluble      |                | insoluble      |                | gelatinous ppt |                |
|            | ethyl acetate                         | insoluble      |                | insoluble      |                | insoluble      |                |

|            |                                       |                |                |                |                |                |                |
|------------|---------------------------------------|----------------|----------------|----------------|----------------|----------------|----------------|
| <b>Sub</b> | H <sub>2</sub> O                      | precipitate    | precipitate    | precipitate    | insoluble      | gel (10 %)     | insoluble      |
|            | ethanol                               | insoluble      | insoluble      | insoluble      | Insoluble      | gelatinous ppt | precipitate    |
|            | PG                                    | gelatinous ppt | precipitate    | gel (4 – 10 %) | gelatinous ppt | gel (8 – 10 %) | gelatinous ppt |
|            | PEG                                   | insoluble      | insoluble      | insoluble      | precipitate    | gel (6 – 10 %) | gel (4-6%)     |
|            | methanol                              | insoluble      |                | insoluble      |                | gelatinous ppt |                |
|            | CH <sub>3</sub> OH/CH <sub>3</sub> CN | precipitate    |                | insoluble      |                | precipitate    |                |
|            | acetonitrile                          | insoluble      |                | insoluble      |                | precipitate    |                |
|            | ethyl acetate                         | insoluble      |                | insoluble      |                | insoluble      |                |
| <b>Az</b>  | H <sub>2</sub> O                      | precipitate    | precipitate    | precipitate    | insoluble      | precipitate    | precipitate    |
|            | ethanol                               | precipitate    | insoluble      | insoluble      | insoluble      | precipitate    | precipitate    |
|            | PG                                    | gel (7 – 17 %) | precipitate    | precipitate    | gelatinous ppt | gelatinous ppt | gel (10 %)     |
|            | PEG                                   | insoluble      | insoluble      | insoluble      | precipitate    | gelatinous ppt | gel (5%)       |
|            | methanol                              | precipitate    |                | insoluble      |                | precipitate    |                |
|            | CH <sub>3</sub> OH/CH <sub>3</sub> CN | insoluble      |                | insoluble      |                | precipitate    |                |
|            | acetonitrile                          | insoluble      |                | insoluble      |                | precipitate    |                |
|            | ethyl acetate                         | insoluble      |                | insoluble      |                | precipitate    |                |
| <b>Seb</b> | H <sub>2</sub> O                      | precipitate    | gelatinous ppt | gel (5 – 7 %)  | insoluble      | gel (7 – 10 %) | gel (5 – 10 %) |
|            | ethanol                               | precipitate    | insoluble      | insoluble      | insoluble      | gelatinous ppt | precipitate    |
|            | PG                                    | precipitate    | precipitate    | precipitate    | gelatinous ppt | precipitate    | gel (10 %)     |
|            | PEG                                   | insoluble      | insoluble      | insoluble      | insoluble      | gel (7 – 10 %) | gel (4-8%)     |
|            | methanol                              | precipitate    |                | insoluble      |                | precipitate    |                |
|            | CH <sub>3</sub> OH/CH <sub>3</sub> CN | precipitate    |                | insoluble      |                | precipitate    |                |
|            | acetonitrile                          | insoluble      |                | insoluble      |                | precipitate    |                |
|            | ethyl acetate                         | insoluble      |                | insoluble      |                | precipitate    |                |

---

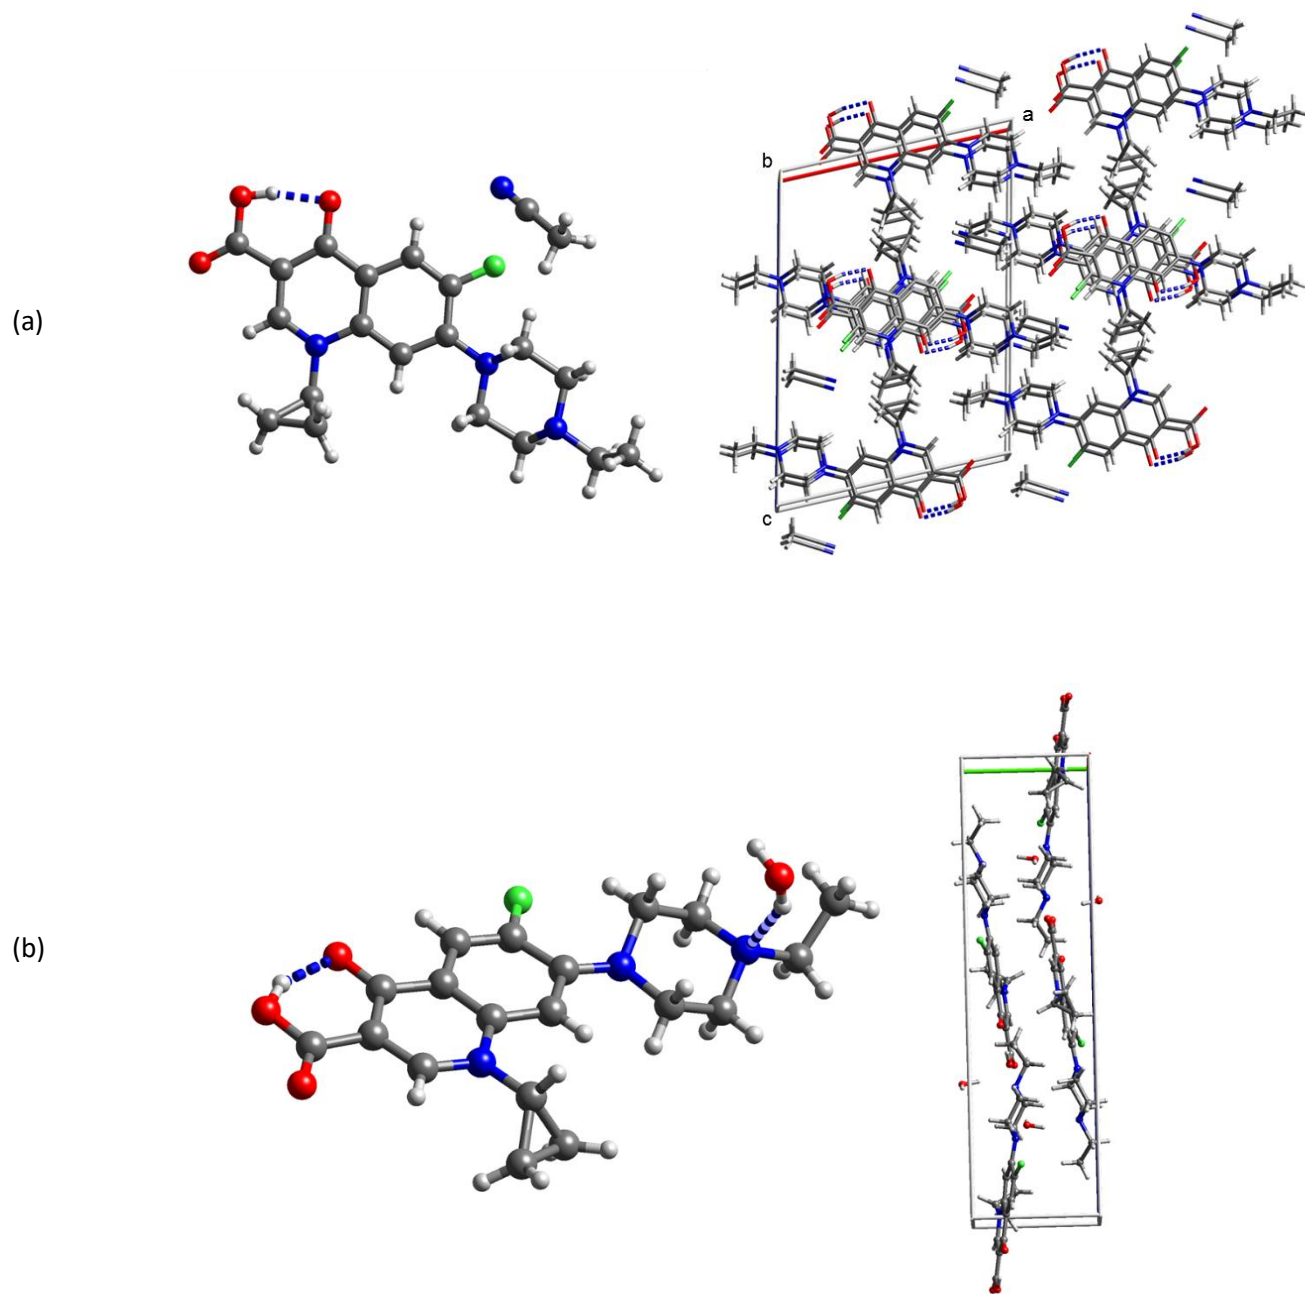

**Figure S1.** Crystal structures of (a) enro·CH<sub>3</sub>CN and (b) enro·H<sub>2</sub>O.

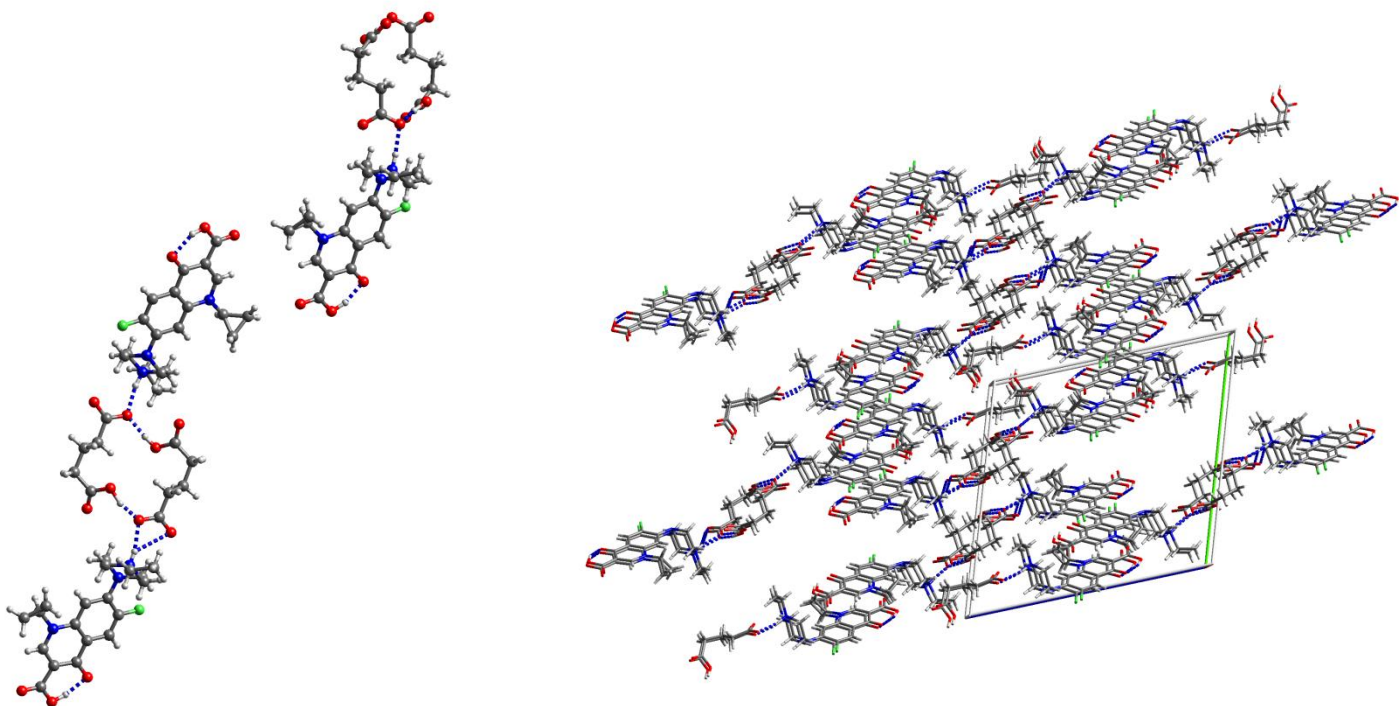

**Figure S2.** H bonding motif and crystal packing of  $(\text{enro}^+)(\text{glu}^-) \cdot 0.33\text{CH}_3\text{CN} \cdot 0.67\text{H}_2\text{O}$ . The asymmetric unit contains three  $\text{enro}^+$  cations, three  $\text{glu}^-$  anions, one acetonitrile molecule and two water molecules of crystallization. The solvent and water molecules of crystallization are not shown for clarity.

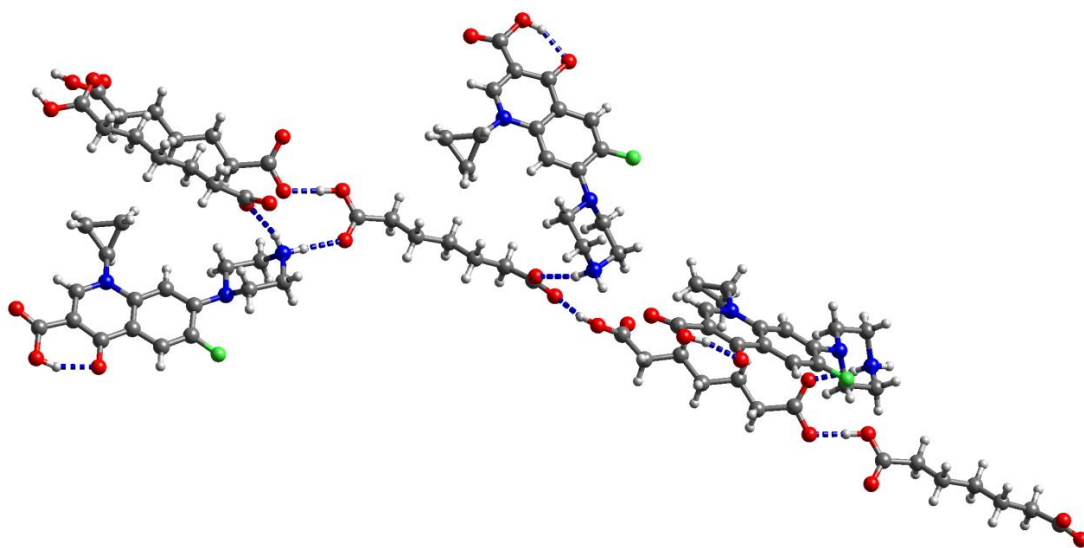

**Figure S3.** H bonding motif in  $(\text{cip}^+)(\text{pim}^-)$ .

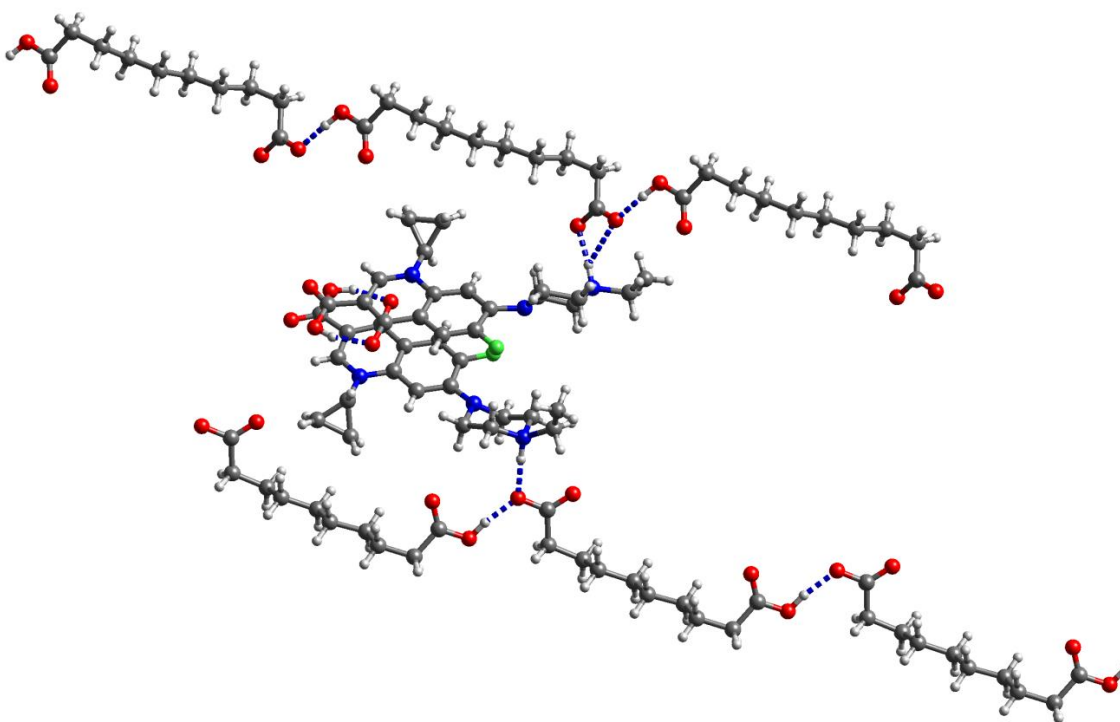

**Figure S4.** H bonding motif in (enro<sup>+</sup>)(seb<sup>-</sup>). For clarity, only one component of the disordered ethyl group of enro<sup>+</sup> is shown.

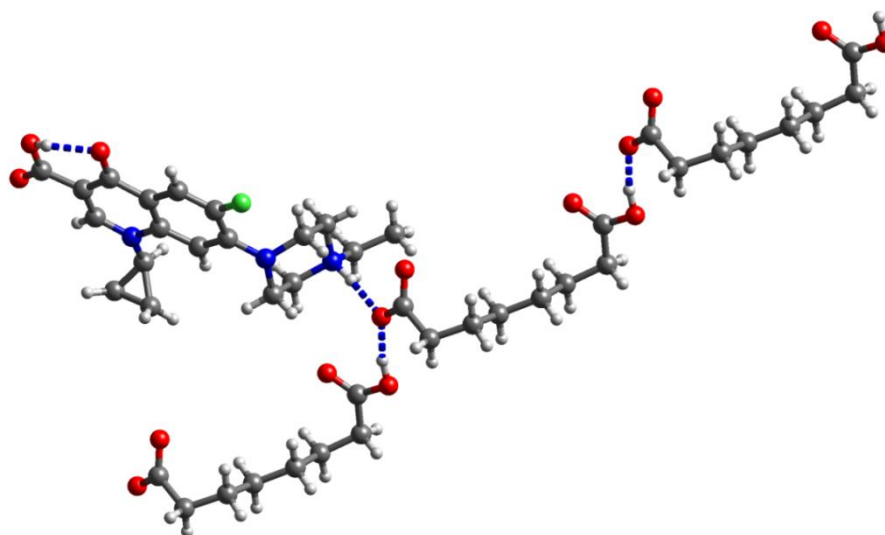

**Figure S5.** H bonding motif in (enro<sup>+</sup>)(sub<sup>-</sup>)·H<sub>2</sub>O. For clarity, the water molecule of crystallization is not shown.

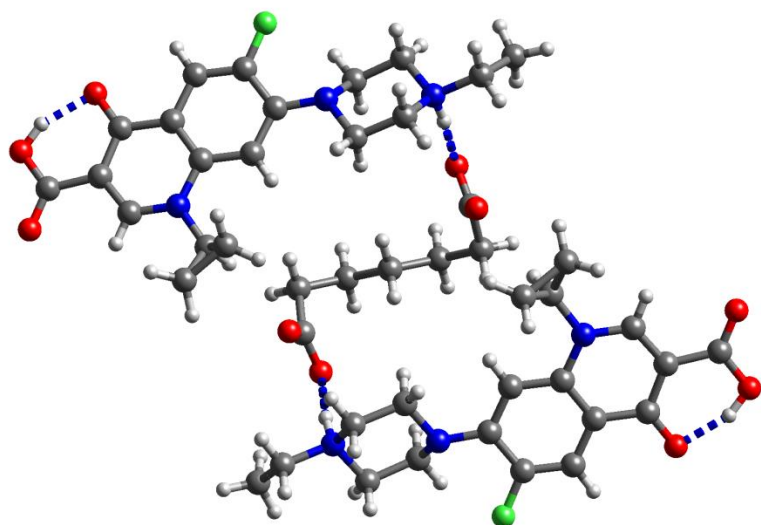

**Figure S6.** H bonding motif in  $(\text{enro}^+)_2(\text{pim}^{2-}) \cdot 1.5\text{H}_2\text{O}$ . The water molecule of crystallization is not shown.

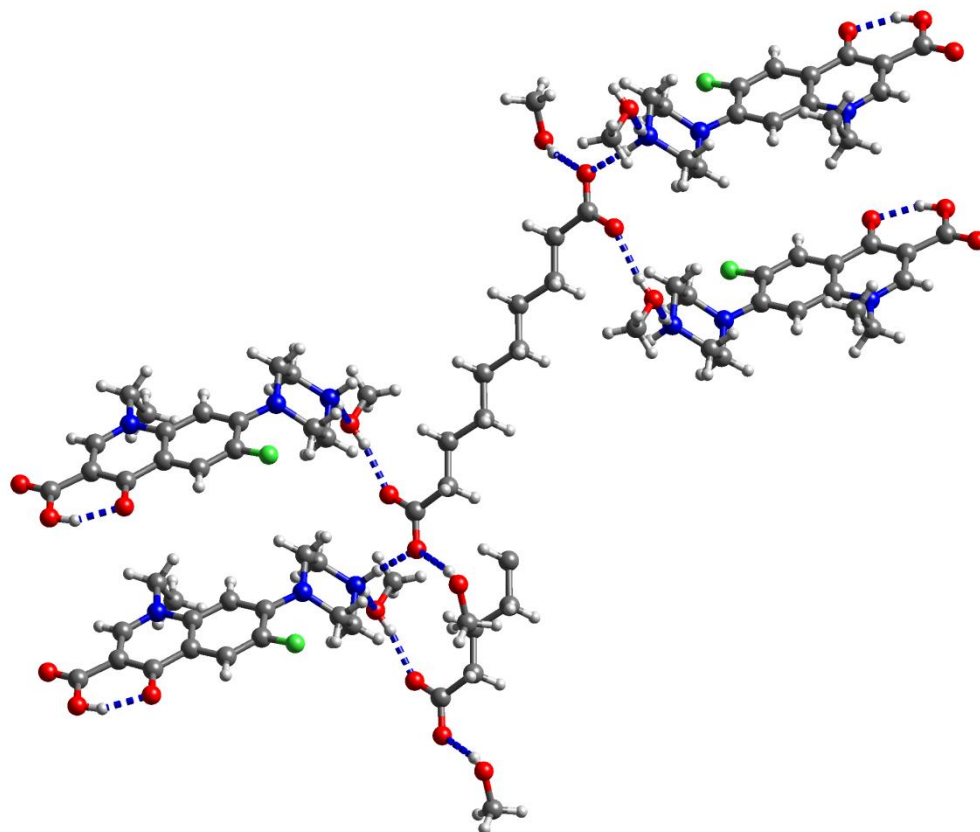

**Figure S7.** H bonding motif in  $(\text{nor}^+)_2(\text{seb}^{2-}) \cdot 4\text{CH}_3\text{OH}$ .

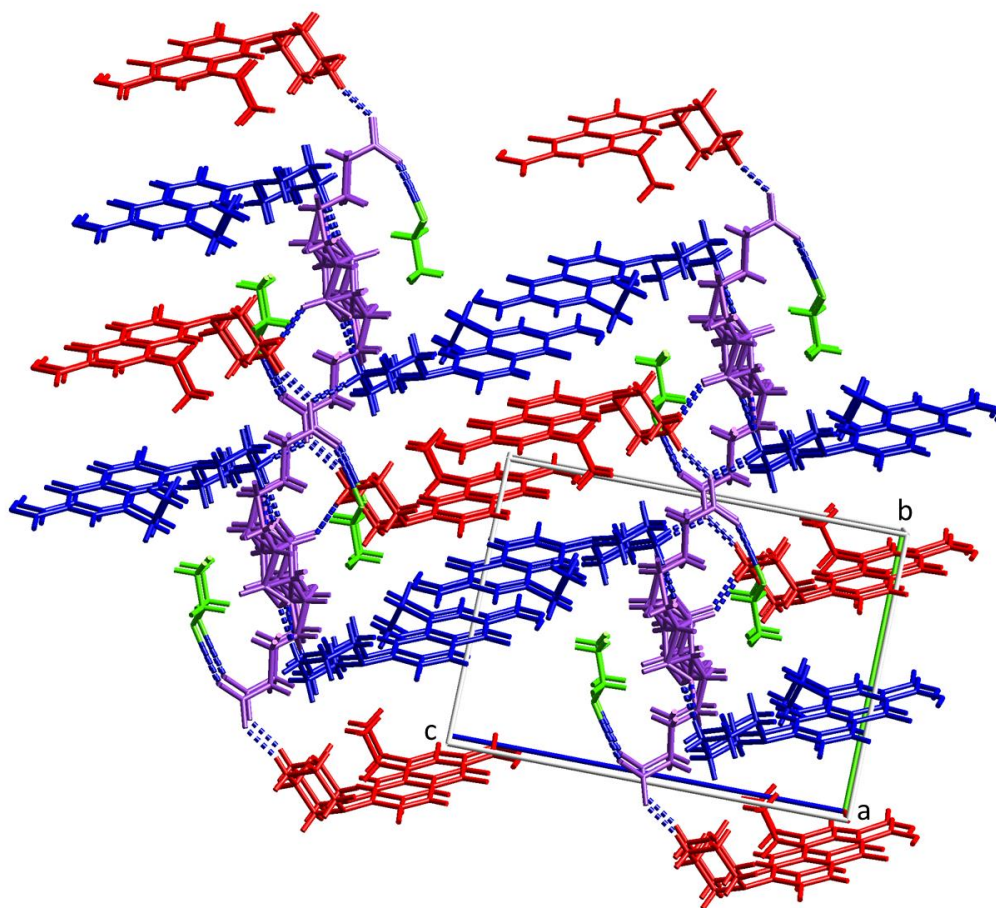

**Figure S8.** Crystal packing of  $(\text{nor}^+)_2(\text{pim}^{2-}) \cdot \text{C}_2\text{H}_5\text{OH}$ .

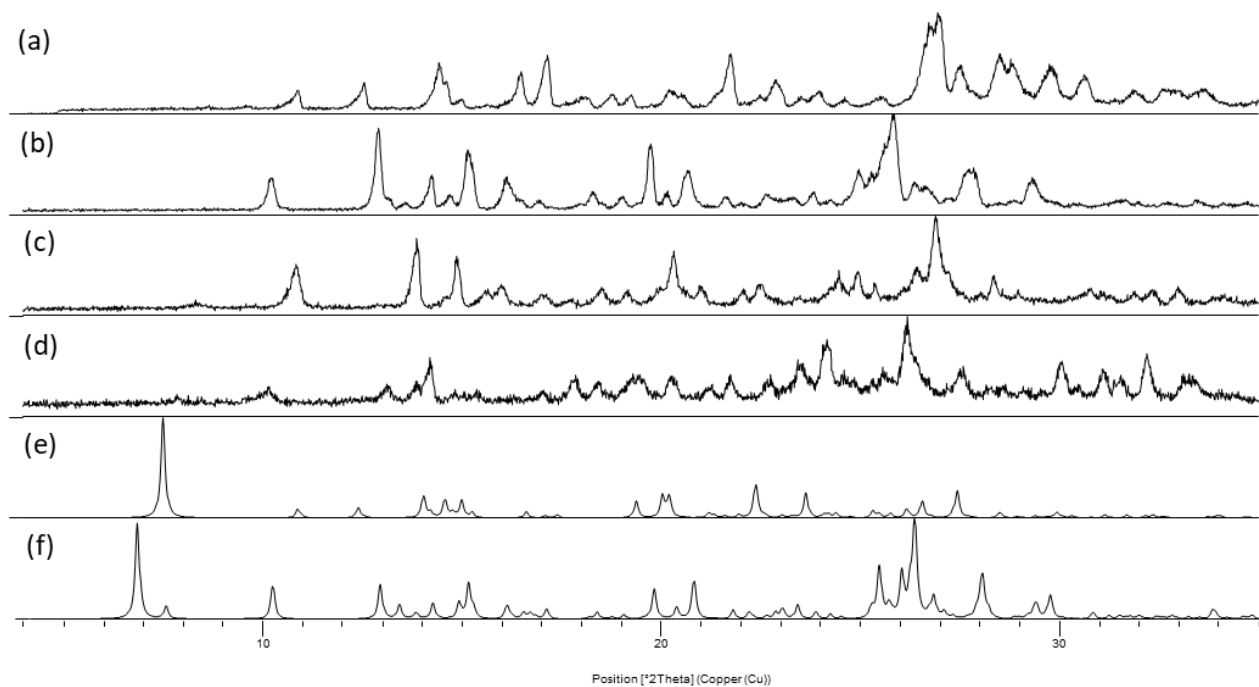

**Figure S9.** (a) XRPD pattern of the bulk sample of  $(\text{enro}^+)_2(\text{pim}^{2-}) \cdot 1.5\text{H}_2\text{O}$ . (b) XRPD pattern of the bulk sample of  $(\text{enro}^+)(\text{pim}^-) \cdot 3\text{H}_2\text{O}$ . (c) XRPD pattern of the residue recovered after the solubility measurement of  $(\text{enro}^+)_2(\text{pim}^{2-}) \cdot 1.5\text{H}_2\text{O}$ . (d) XRPD pattern of the residue recovered after the solubility measurement of  $(\text{enro}^+)(\text{pim}^-) \cdot 3\text{H}_2\text{O}$ . (e) Theoretical XRPD pattern calculated from the single crystal data of  $(\text{enro}^+)_2(\text{pim}^{2-}) \cdot 1.5\text{H}_2\text{O}$ . (f) Theoretical XRPD pattern calculated from the single crystal data of  $(\text{enro}^+)(\text{pim}^-) \cdot 3\text{H}_2\text{O}$



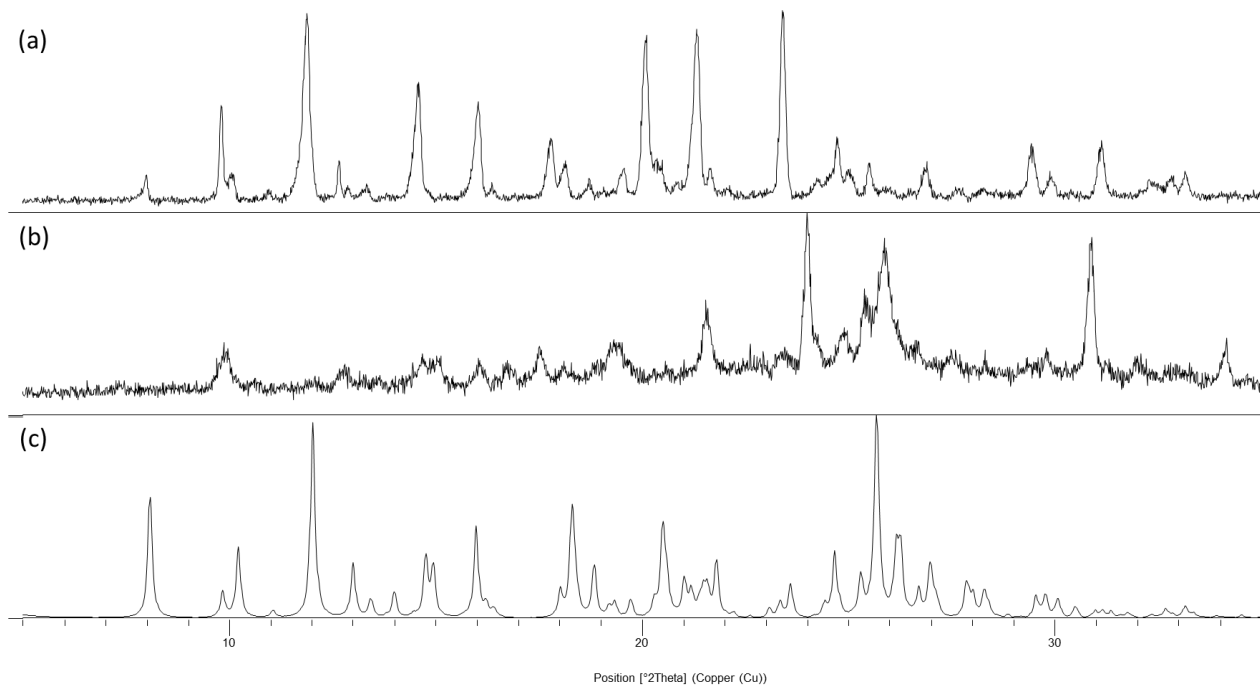

**Figure S10.** (a) XRPD pattern of the bulk sample of  $(\text{enro}^+)(\text{sub}^-) \cdot \text{H}_2\text{O}$ . (b) XRPD pattern of the residue recovered after the solubility measurement. (c) Theoretical XRPD pattern calculated from the single crystal data.

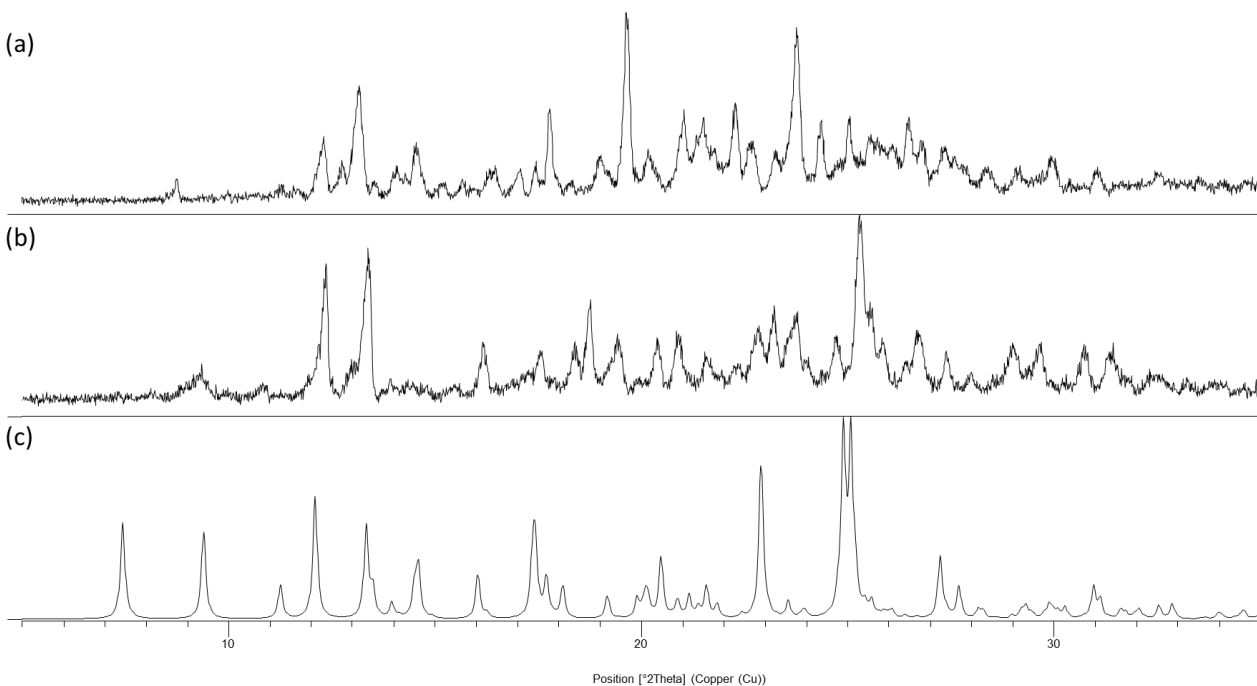

**Figure S11.** (a) XRPD pattern of the bulk sample of  $(\text{enro}^+)(\text{az}^-)$ . (b) XRPD pattern of the residue recovered after the solubility measurement. (c) Theoretical XRPD pattern calculated from the single crystal data.

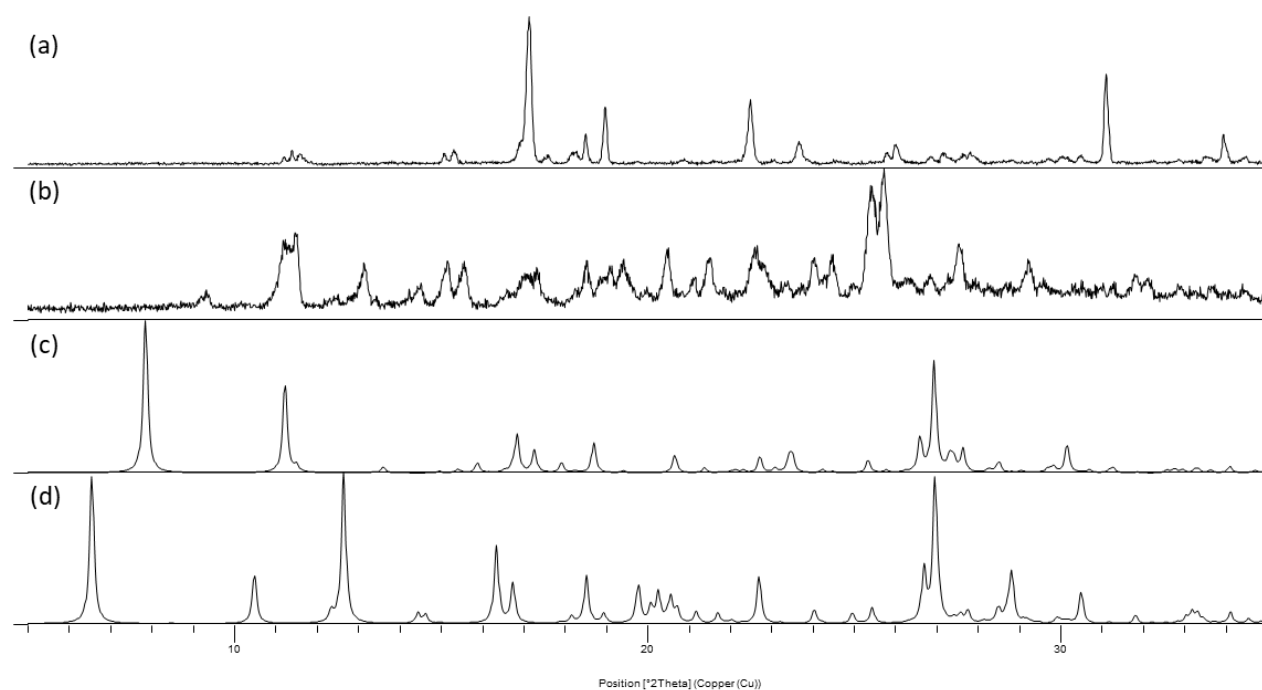

**Figure S12.** (a) XRPD pattern of the bulk sample of  $(\text{nor}^+)_2(\text{adi}^{2-}) \cdot 2\text{H}_2\text{O}$  form I. (b) XRPD pattern of the residue recovered after the solubility measurement. (c) Theoretical XRPD pattern calculated from the single crystal data of  $(\text{nor}^+)_2(\text{adi}^{2-}) \cdot 2\text{H}_2\text{O}$  form I. (d) Theoretical XRPD pattern calculated from the single crystal data of  $(\text{nor}^+)_2(\text{adi}^{2-}) \cdot 2\text{H}_2\text{O}$  form II.

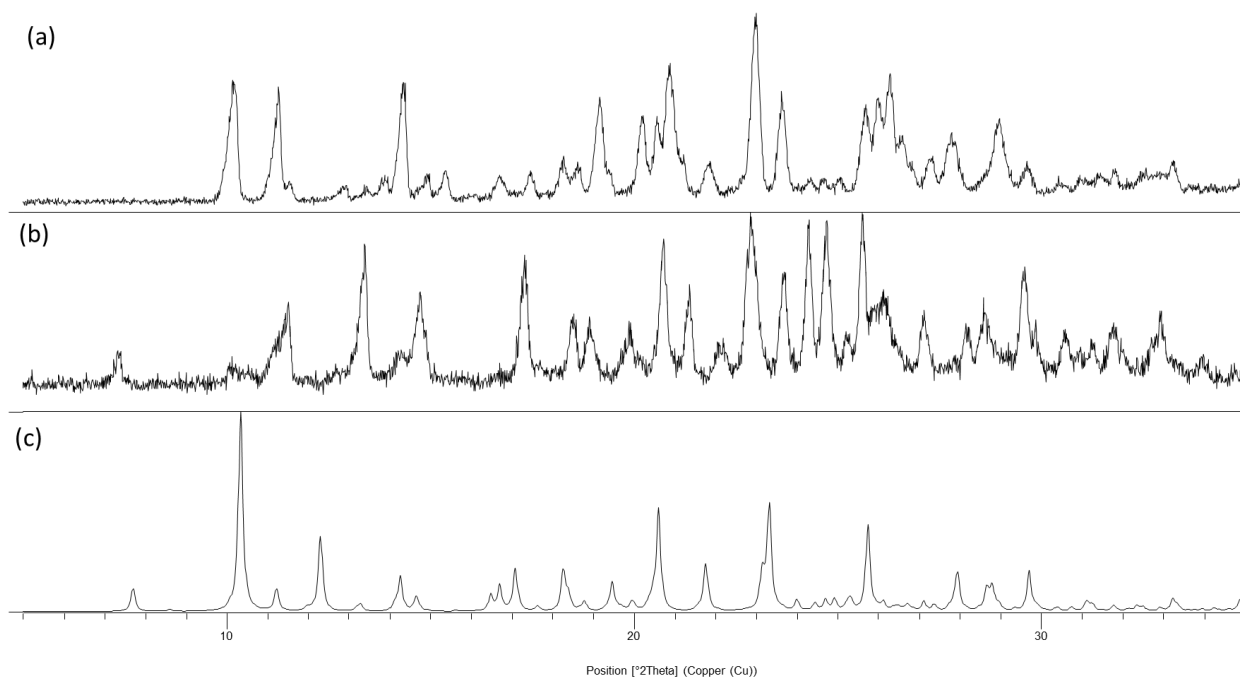

**Figure S13.** (a) XRPD pattern of the bulk sample of  $(\text{nor}^+)(\text{pim}^-)$ . (b) XRPD pattern of the residue after the solubility testing. (c) Theoretical XRPD pattern calculated from the single crystal data.

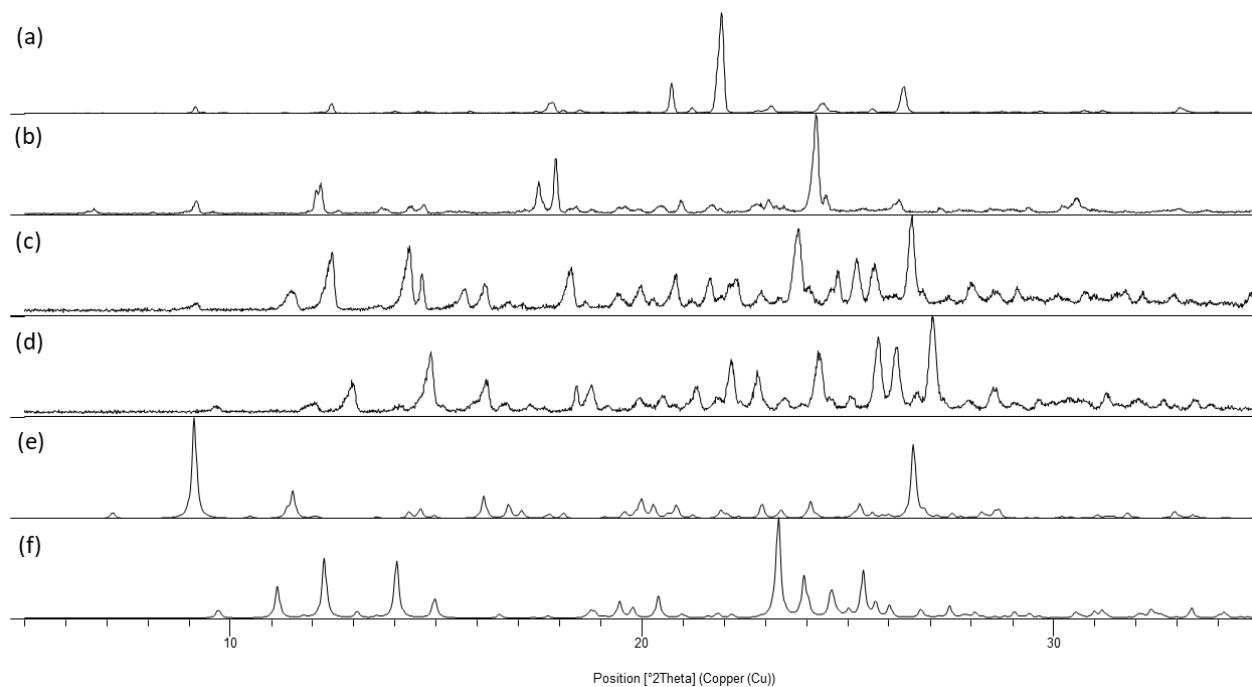

**Figure S14.** (a) XRPD pattern of the bulk sample of  $(\text{nor}^+)(\text{sub}^-)\cdot 3\text{H}_2\text{O}$ . (b) XRPD pattern of the bulk sample of  $(\text{nor}^+)(\text{sub}^-)$ . (c) XRPD pattern of the residue recovered after the solubility measurement of  $(\text{nor}^+)(\text{sub}^-)\cdot 3\text{H}_2\text{O}$ . (d) XRPD pattern of the residue recovered after the solubility measurement of  $(\text{nor}^+)(\text{sub}^-)$ . (e) Theoretical XRPD pattern calculated from the single crystal data of  $(\text{nor}^+)(\text{sub}^-)\cdot 3\text{H}_2\text{O}$ . (f) Theoretical XRPD pattern calculated from the single crystal data of  $(\text{nor}^+)(\text{sub}^-)$ .

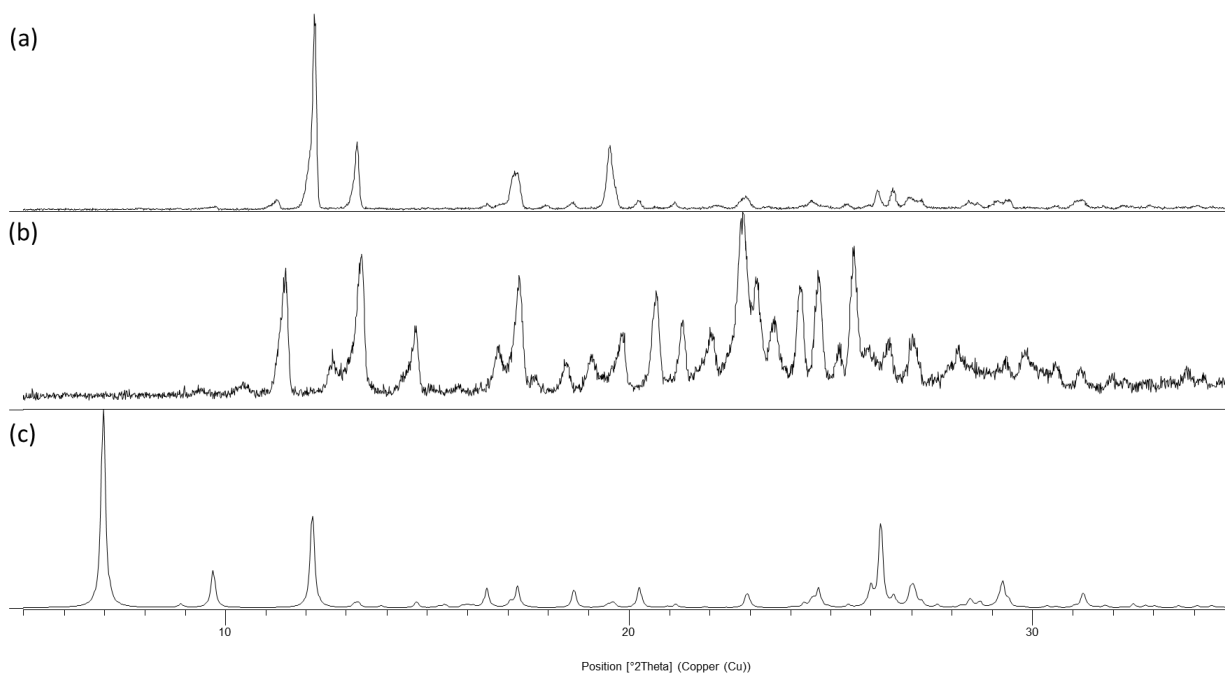

**Figure S15.** (a) XRPD pattern of the bulk sample of  $(\text{nor}^+)_2(\text{seb}^{2-}) \cdot 3\text{H}_2\text{O}$ . (b) XRPD pattern of the residue recovered after the solubility measurement. (c) Theoretical XRPD pattern calculated from the single crystal data.

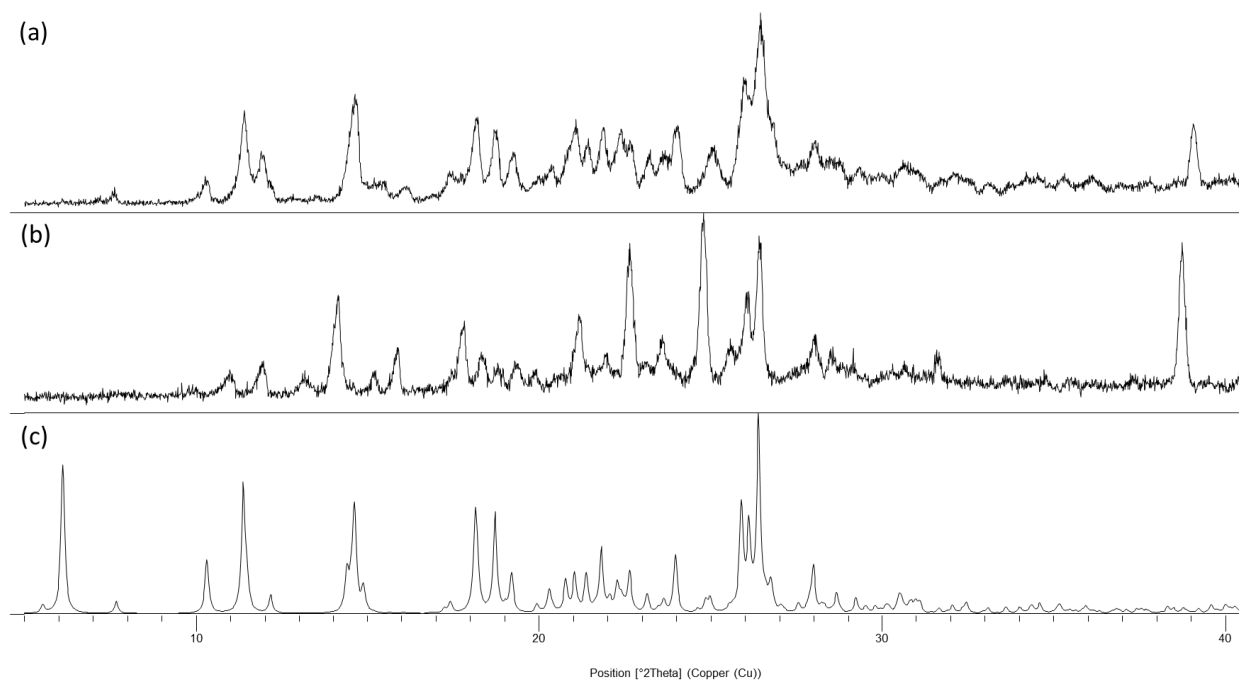

**Figure S16.** (a) XRPD pattern of the bulk sample of  $(\text{cip}^+)(\text{glu}^-)$ . (b) XRPD pattern of the residue recovered after the solubility measurement. (c) Theoretical XRPD pattern calculated from the single crystal data.

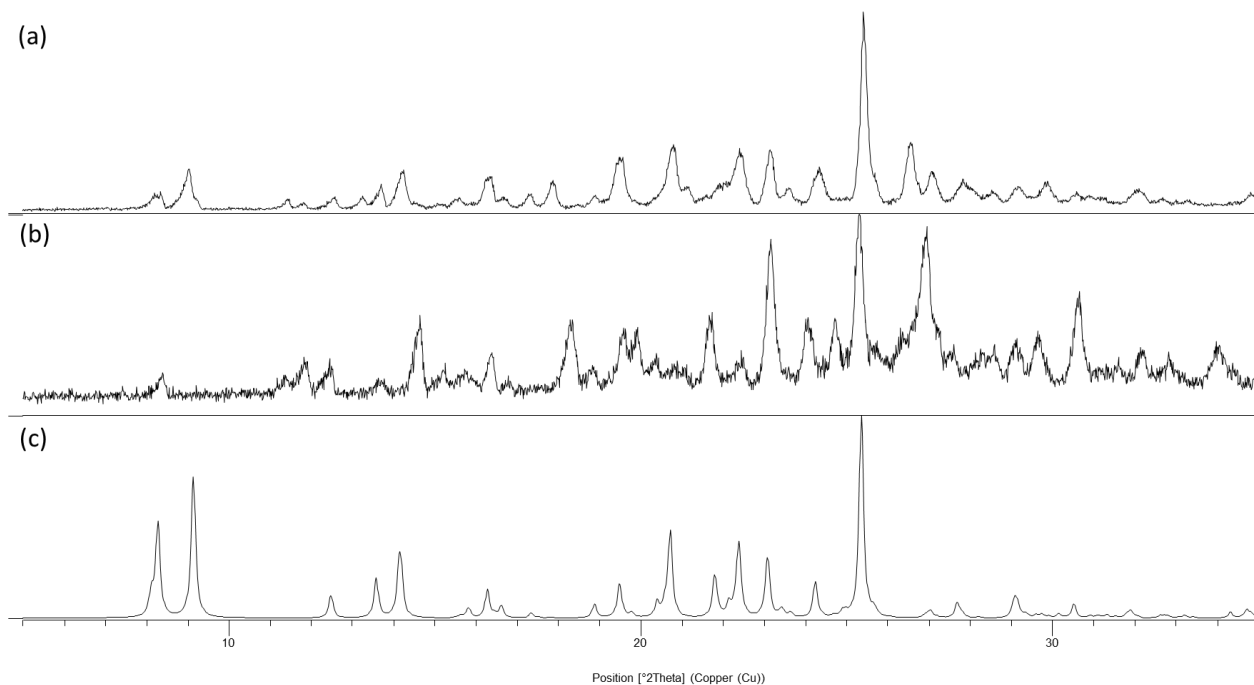

**Figure S17.** (a) XRPD pattern of the bulk sample of  $(cip^+)(pim^-)$ . (b) XRPD pattern of the residue recovered after the solubility measurement. (c) Theoretical XRPD pattern calculated from the single crystal data.

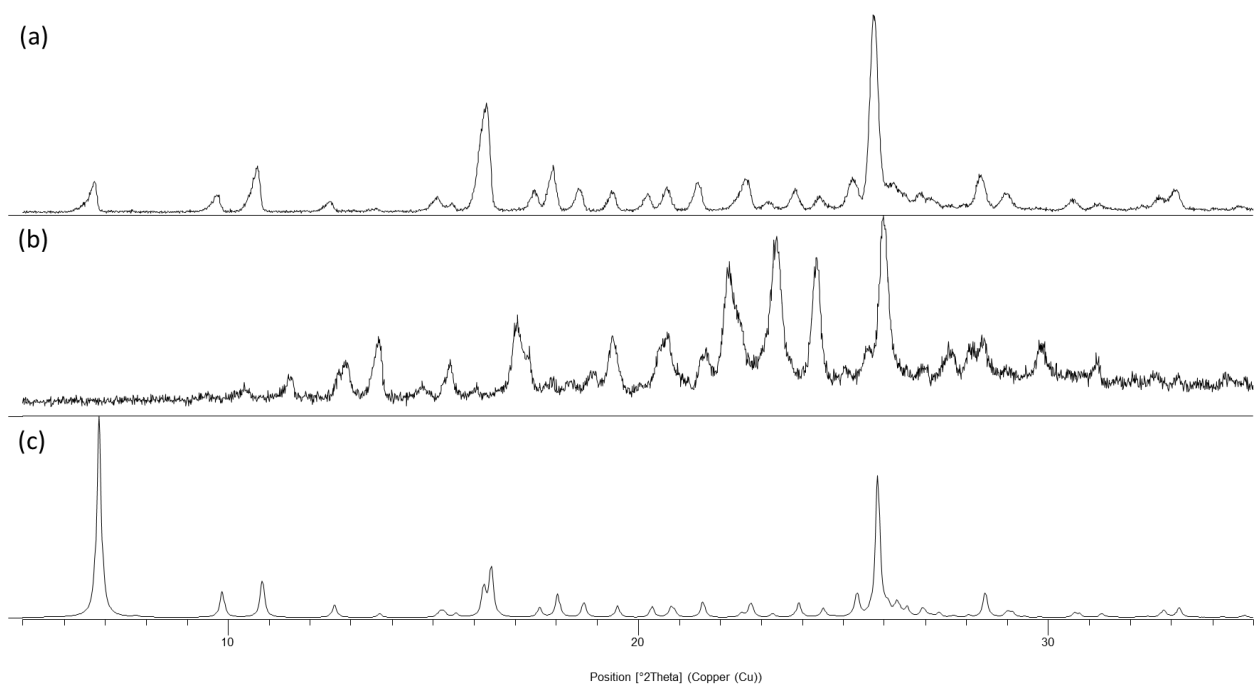

**Figure S18.** (a) XRPD pattern of the bulk sample of  $(cip^+)_2(sub^{2-}) \cdot 4H_2O$ . (b) XRPD pattern of the residue recovered after the solubility measurement. (c) Theoretical XRPD pattern calculated from the single crystal data.

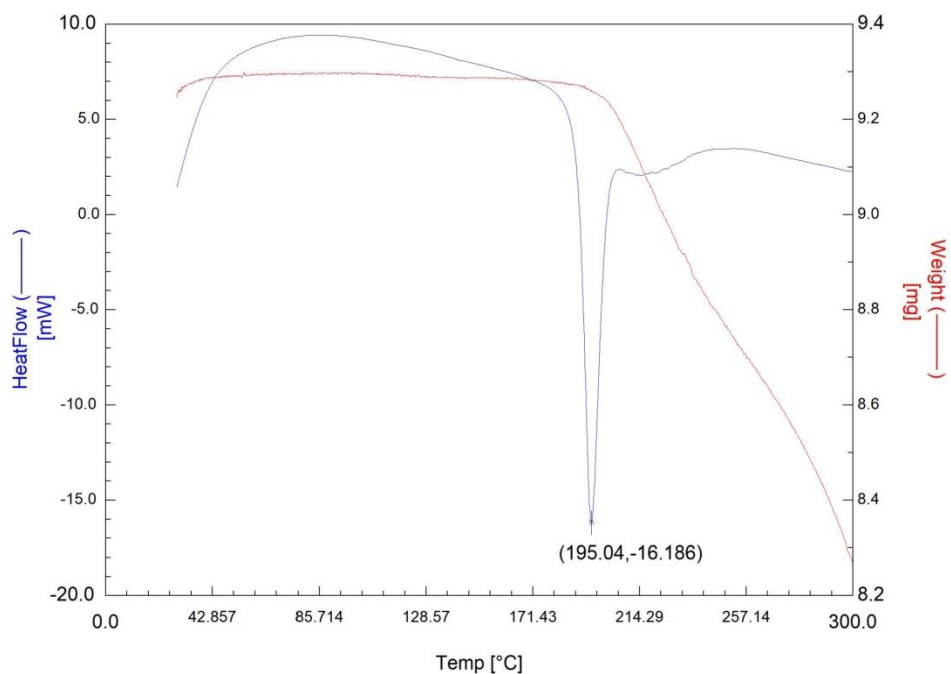

Figure S19. DSC/TGA plot of (cip<sup>+</sup>)(pim<sup>-</sup>).

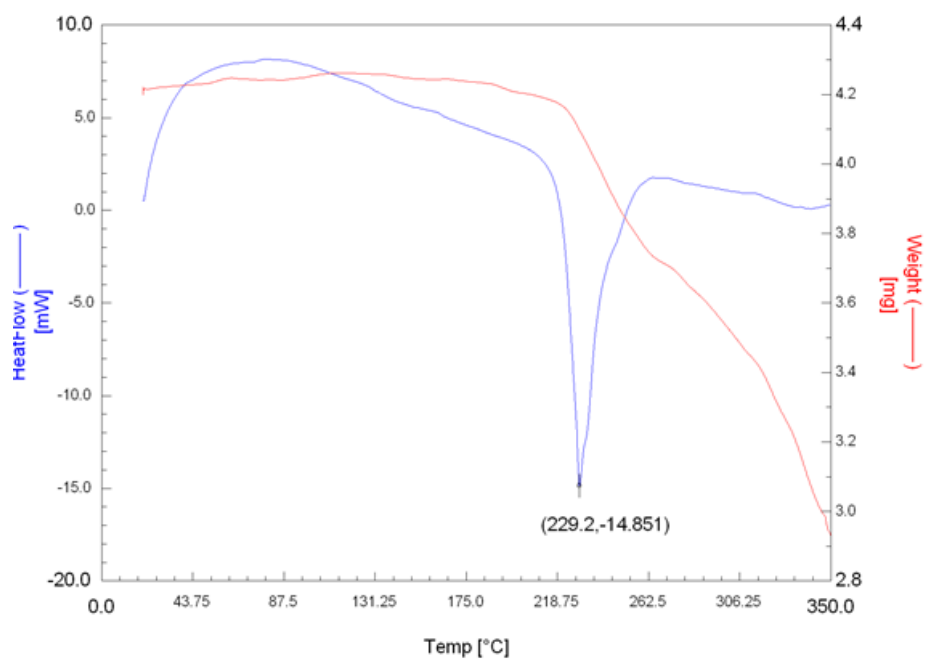

Figure S20. DSC/TGA plot of (cip<sup>+</sup>)(glu<sup>-</sup>).

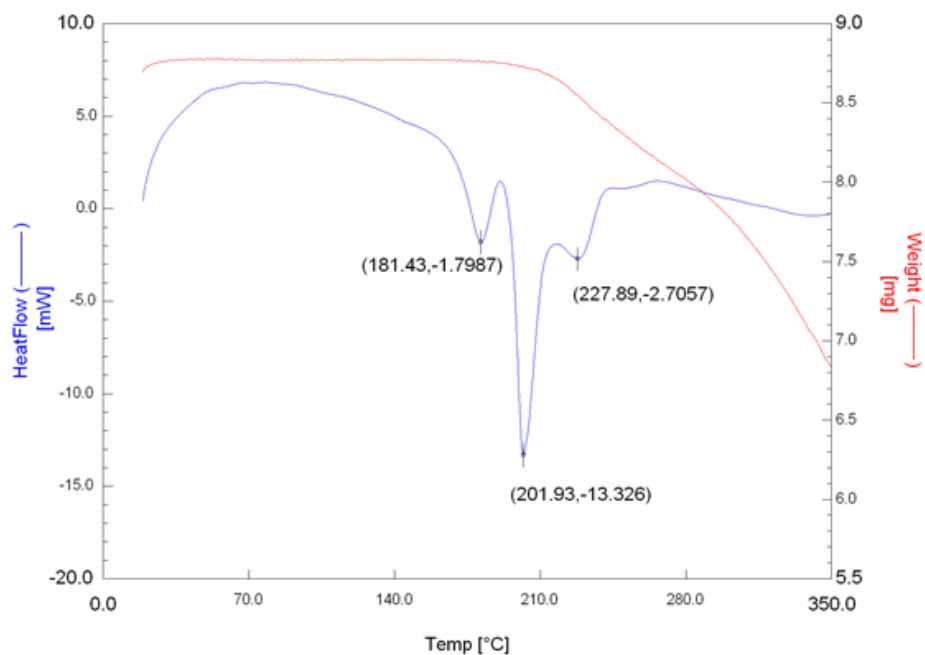

Figure S21. DSC/TGA plot of (nor<sup>+</sup>)(pim<sup>-</sup>).

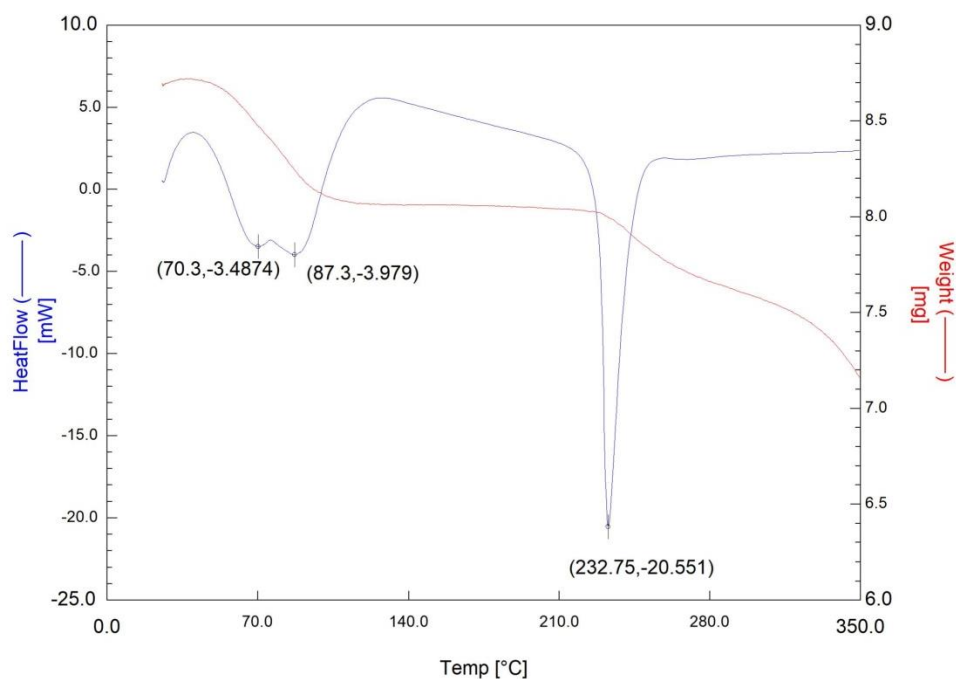

Figure S22. DSC/TGA plot of (cip<sup>+</sup>)<sub>2</sub>(sub<sup>2-</sup>)·4H<sub>2</sub>O.

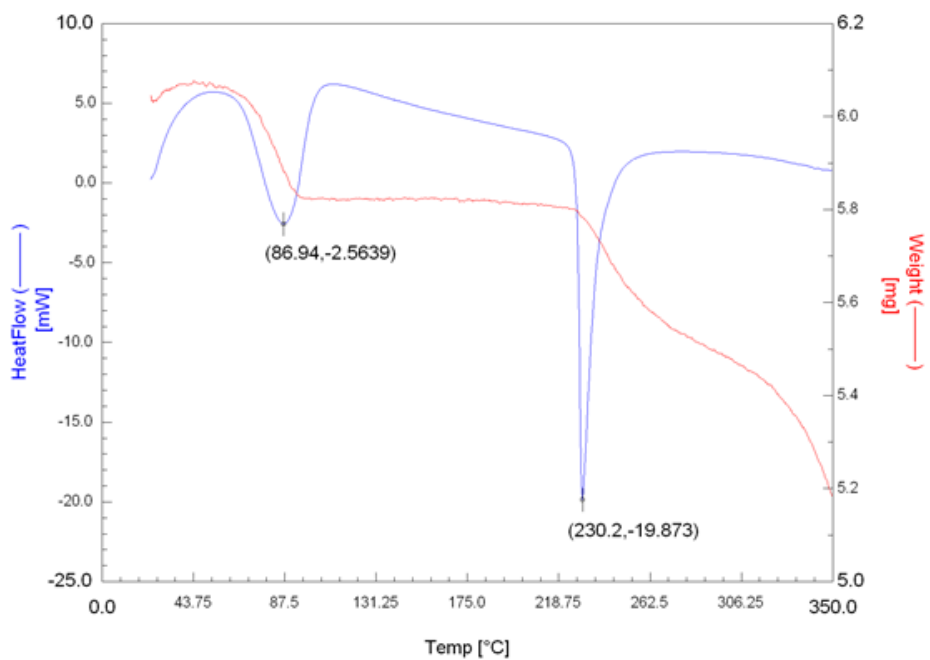

Figure S23. DSC/TGA plot of  $(\text{nor}^+)_2(\text{adi}^{2-}) \cdot 2\text{H}_2\text{O}$  form I.

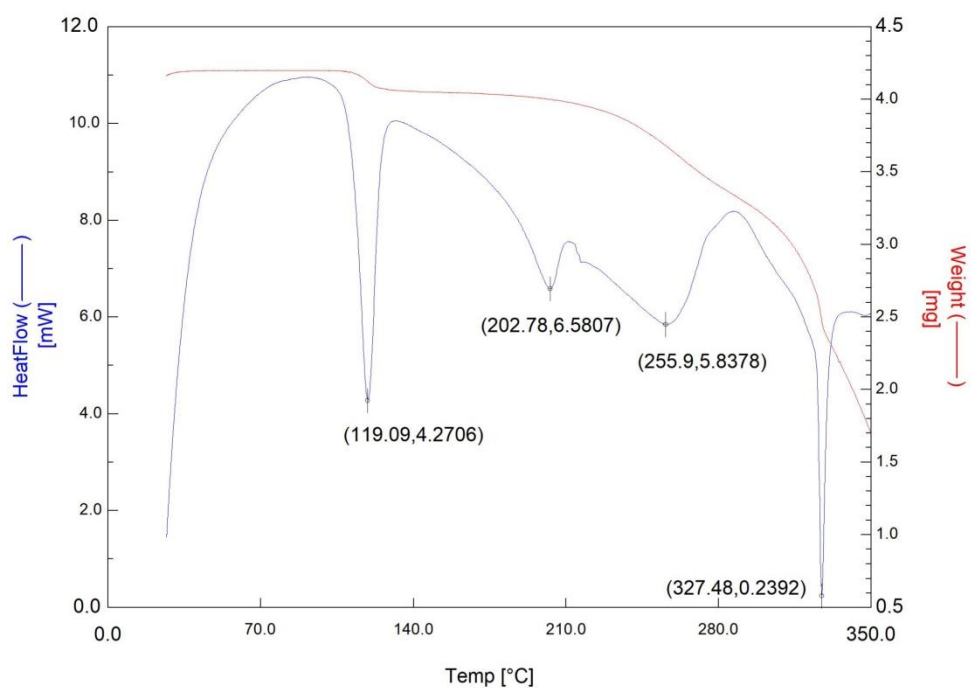

Figure S24. DSC/TGA plot of  $(\text{enro}^+)_2(\text{pim}^{2-}) \cdot 1.5\text{H}_2\text{O}$ .



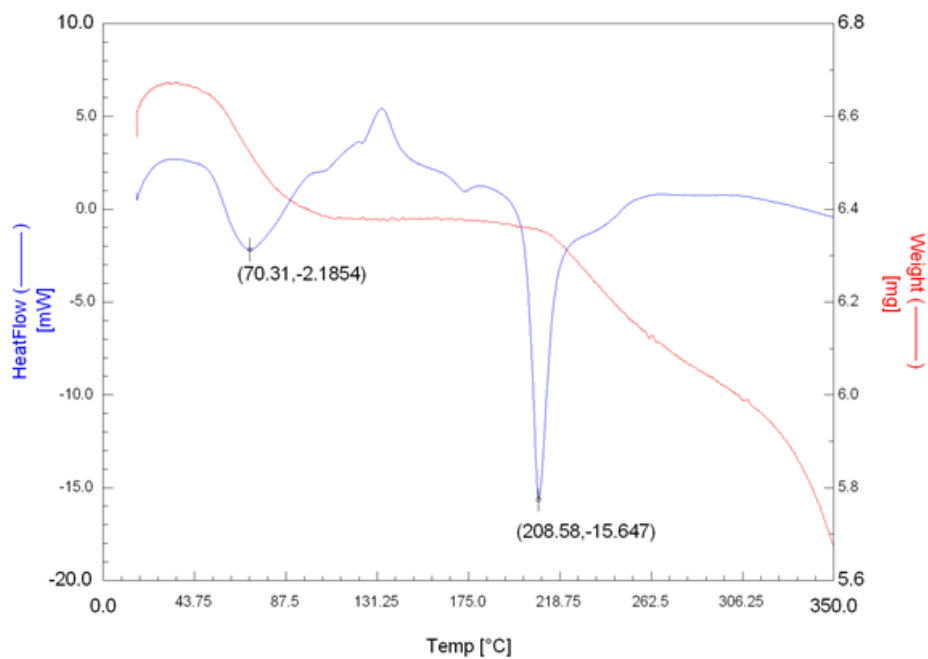

Figure S25. DSC/TGA plot of  $(\text{nor}^+)_2(\text{seb}^{2-}) \cdot 3\text{H}_2\text{O}$ .

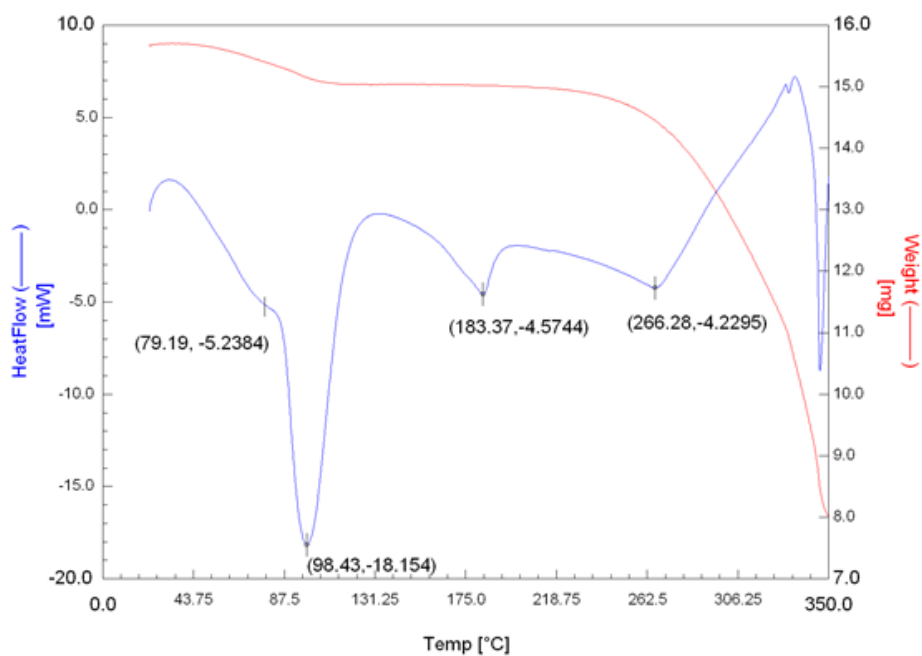

Figure S26. DSC/TGA plot of  $(\text{enro}^+)(\text{sub}^-) \cdot \text{H}_2\text{O}$ .

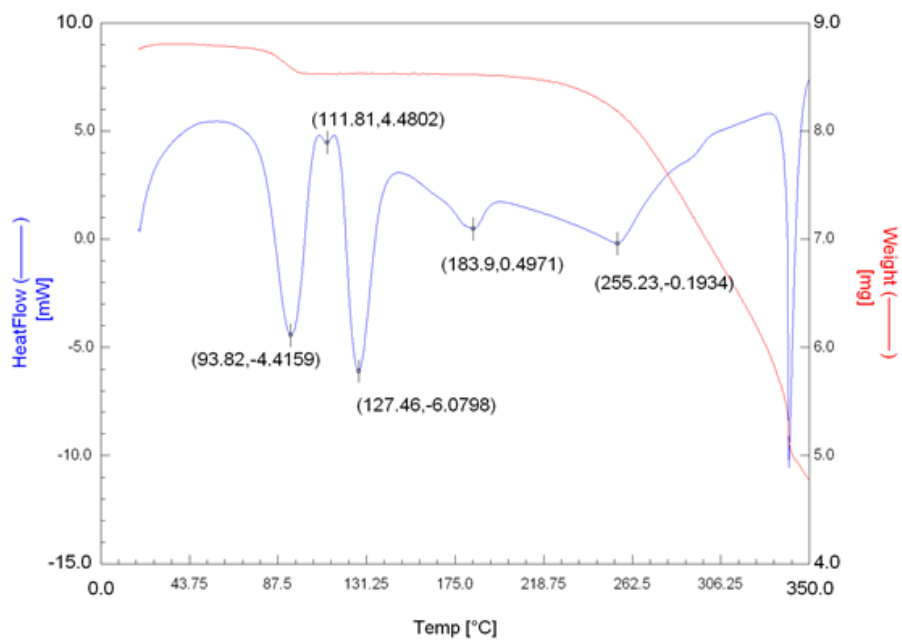

Figure S27. DSC/TGA plot of  $(\text{enro}^+)(\text{pim}^-)\cdot 3\text{H}_2\text{O}$ .

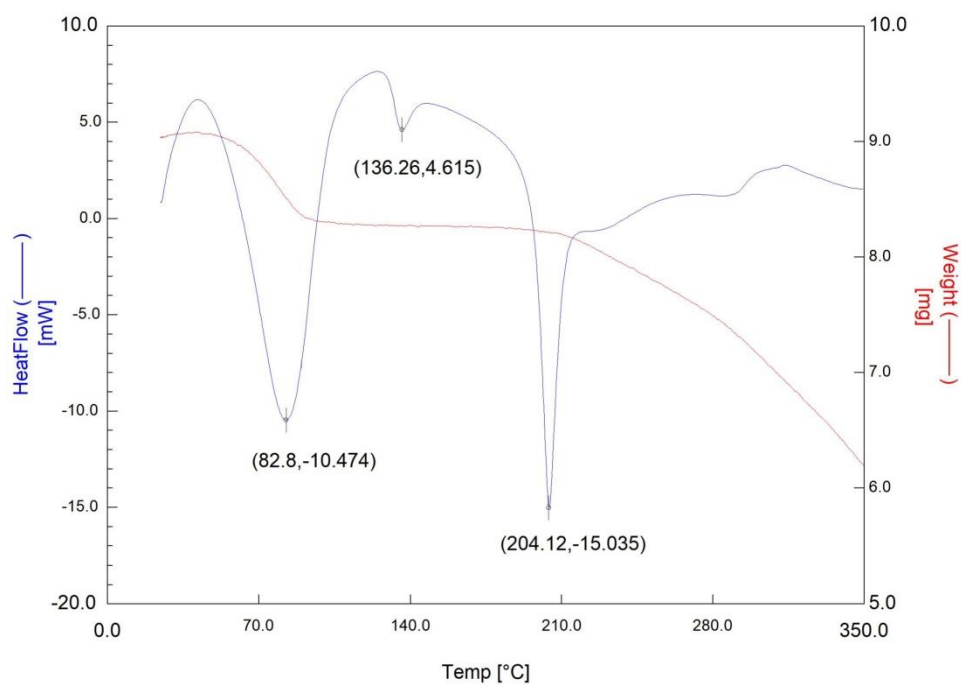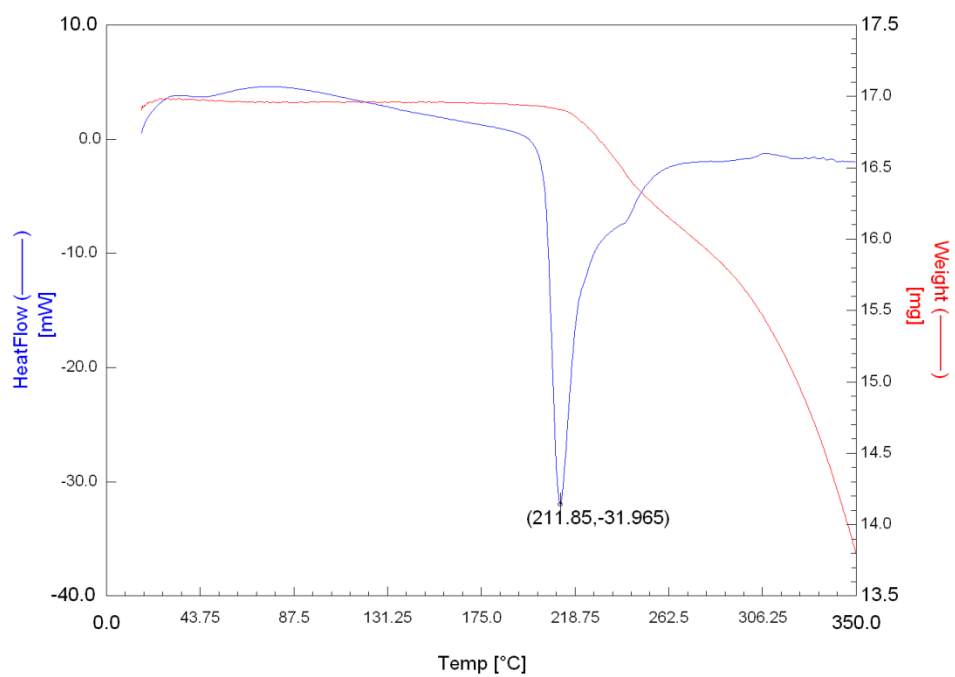

**Figure S28.** DSC/TGA plot of  $(\text{nor}^+)(\text{sub}^-)\cdot 3\text{H}_2\text{O}$  before (top) and after (bottom) heating to 140 °C for 15 min.

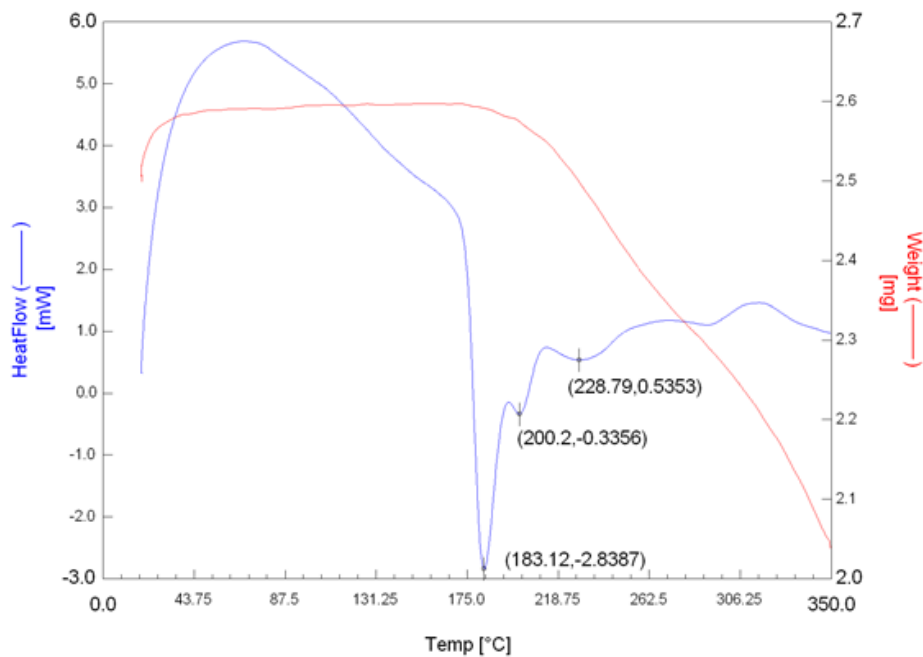

Figure S29. DSC/TGA plot of (nor<sup>+</sup>)(sub<sup>-</sup>).

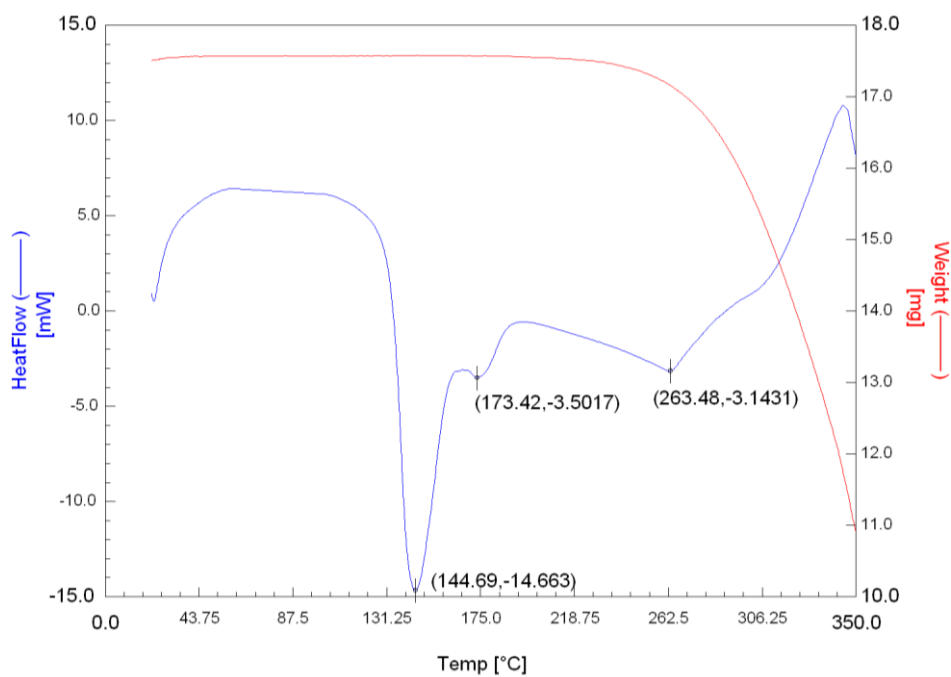

Figure S30. DSC/TGA plot of (enro<sup>+</sup>)(az<sup>-</sup>).

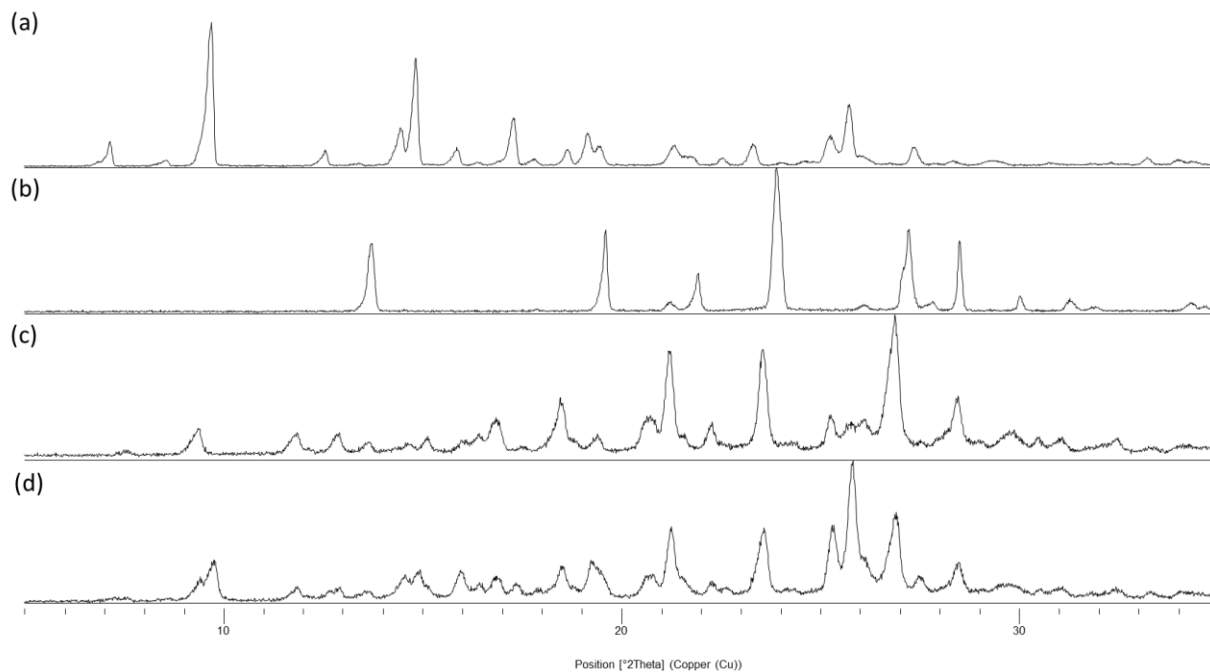

**Figure S31.** XRPD pattern of (a) enro, (b) glutaric acid, (c) a 1:1 mixture of enro and glutaric acid after ball-milling for 60 min at room temperature and (d) a 2:1 mixture of enro and glutaric acid after ball-milling for 60 min at room temperature.

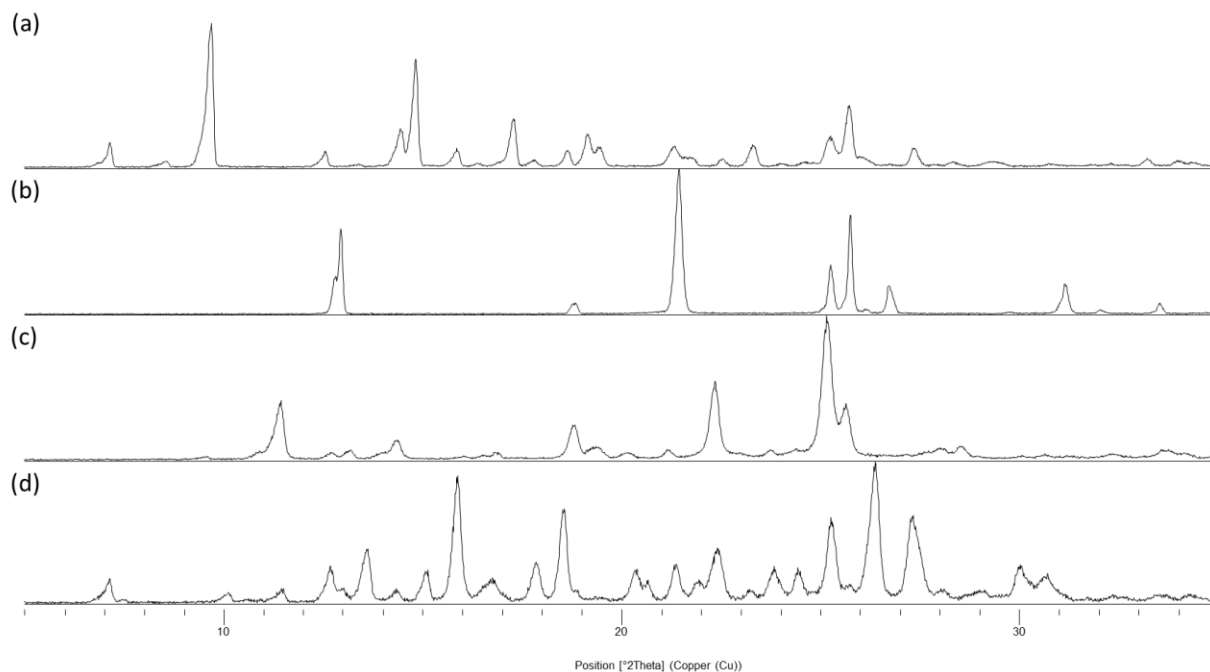

**Figure S32.** XRPD pattern of (a) enro, (b) adipic acid, (c) a 1:1 mixture of enro and adipic acid after ball-milling for 60 min at room temperature and (d) a 2:1 mixture of enro and adipic acid after ball-milling for 60 min at room temperature.

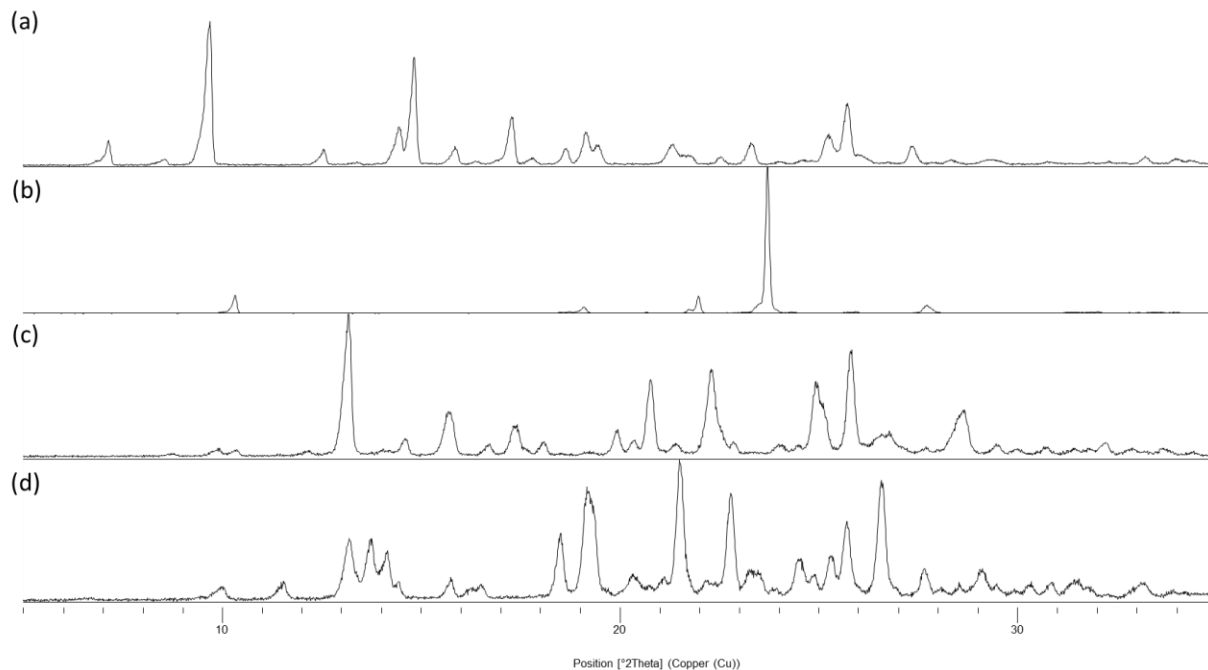

**Figure S33.** XRPD pattern of (a) enro, (b) pimelic acid, (c) a 1:1 mixture of enro and pimelic acid after ball-milling for 60 min at room temperature and (d) a 2:1 mixture of enro and pimelic acid after ball-milling for 60 min at room temperature.

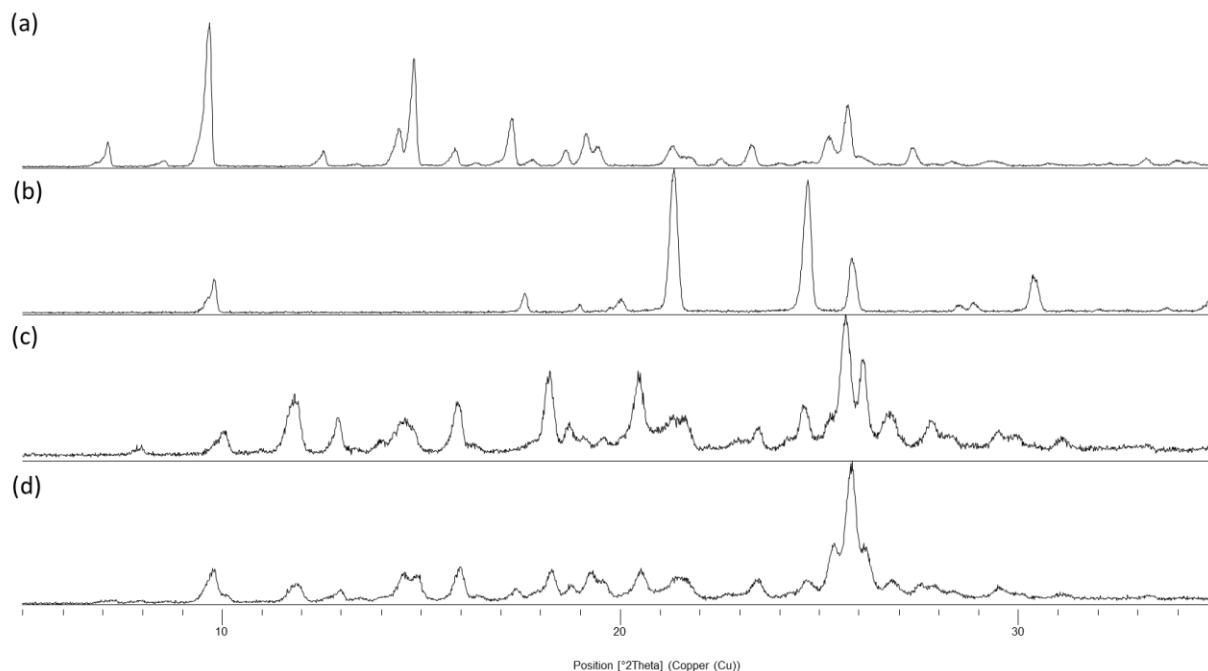

**Figure S34.** XRPD pattern of (a) enro, (b) suberic acid, (c) a 1:1 mixture of enro and suberic acid after ball-milling for 60 min at room temperature and (d) a 2:1 mixture of enro and suberic acid after ball-milling for 60 min at room temperature.

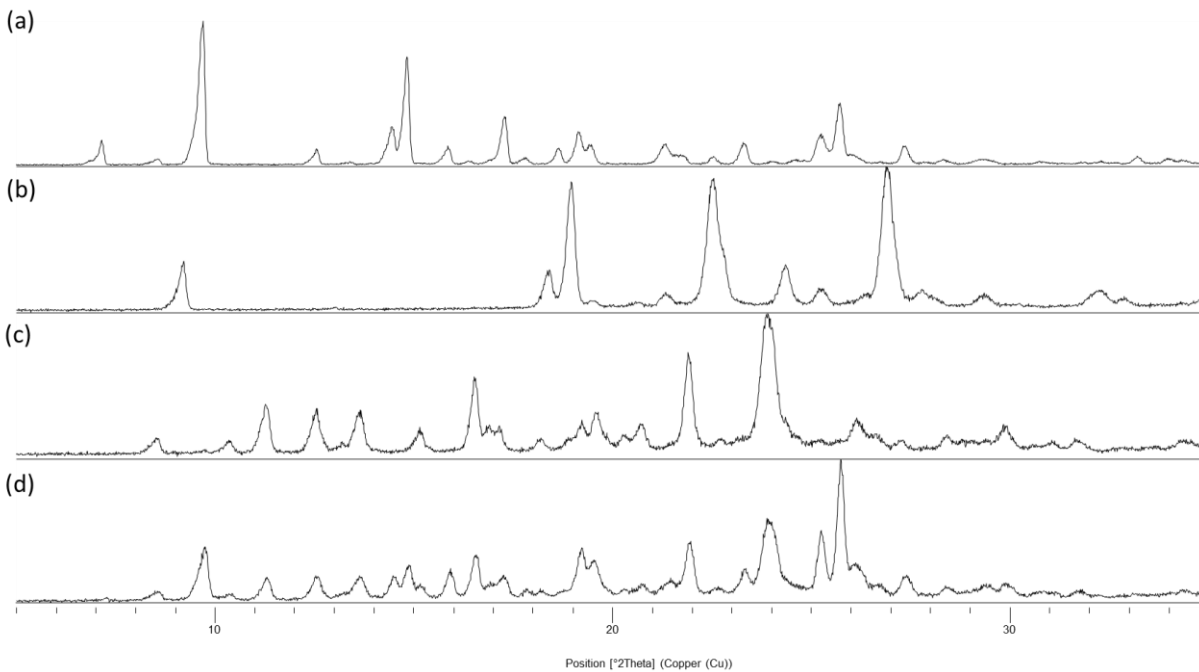

**Figure S35.** XRPD pattern of (a) enro, (b) azeliac acid, (c) a 1:1 mixture of enro and azeliac acid after ball-milling for 60 min at room temperature and (d) a 2:1 mixture of enro and azeliac acid after ball-milling for 60 min at room temperature.

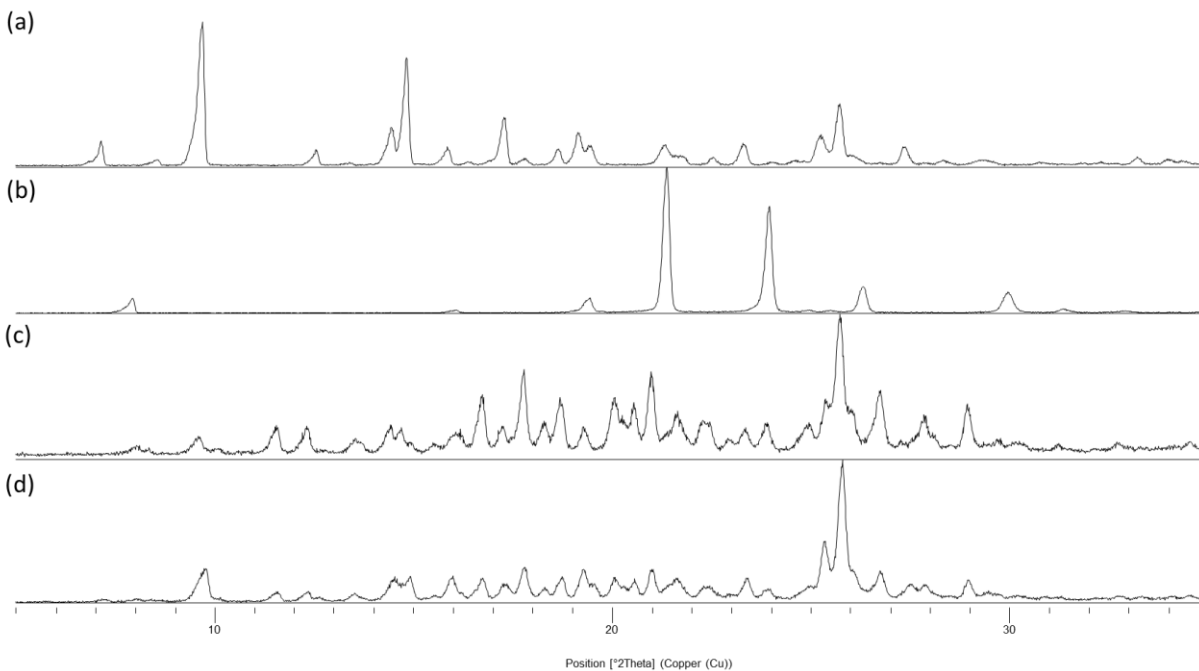

**Figure S36.** XRPD pattern of (a) enro, (b) sebacic acid and (c) a 1:1 mixture of enro and sebacic acid after ball-milling for 60 min at room temperature and (d) a 2:1 mixture of enro and sebacic acid after ball-milling for 60 min at room temperature.

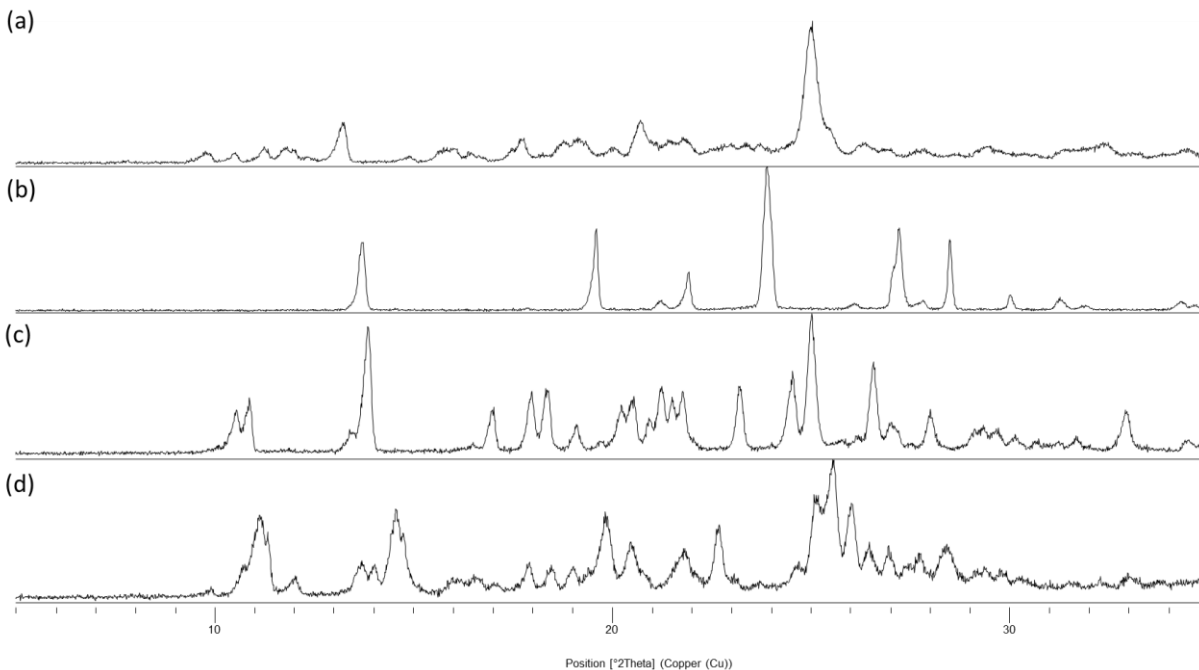

**Figure S37.** XRPD pattern of (a) nor, (b) glutaric acid and (c) a 1:1 mixture of nor and glutaric acid after ball-milling for 60 min at room temperature and (d) a 2:1 mixture of nor and glutaric acid after ball-milling for 60 min at room temperature.

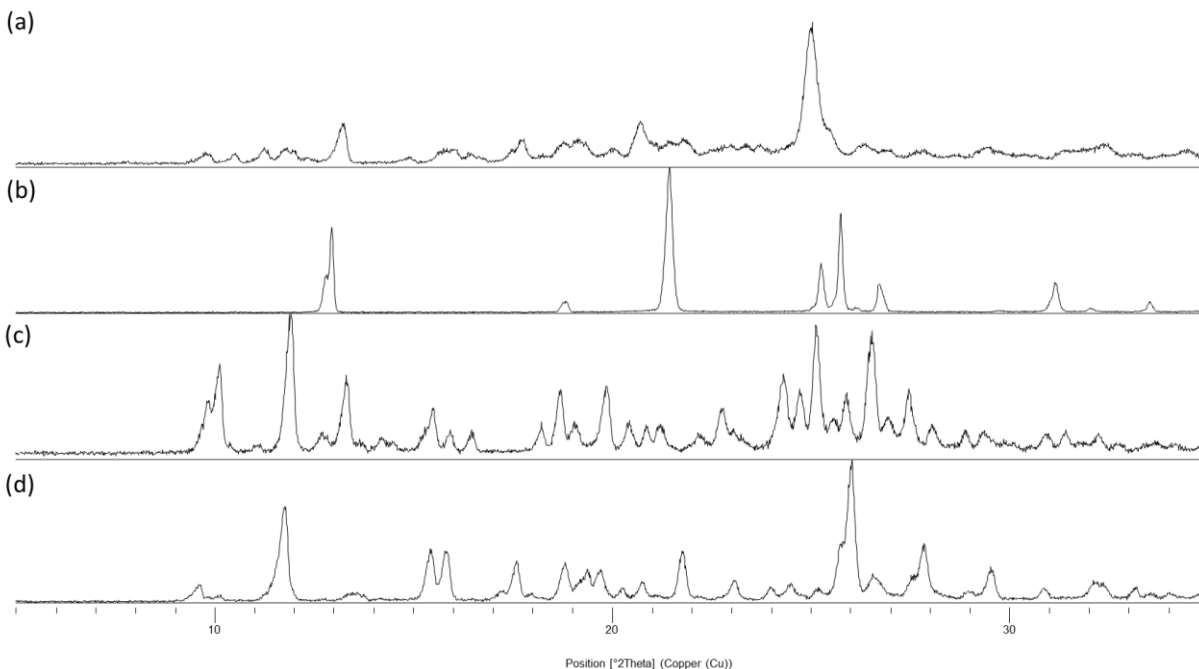

**Figure S38.** XRPD pattern of (a) nor, (b) adipic acid and (c) a 1:1 mixture of nor and adipic acid after ball-milling for 60 min at room temperature and (d) a 2:1 mixture of nor and adipic acid after ball-milling for 60 min at room temperature.



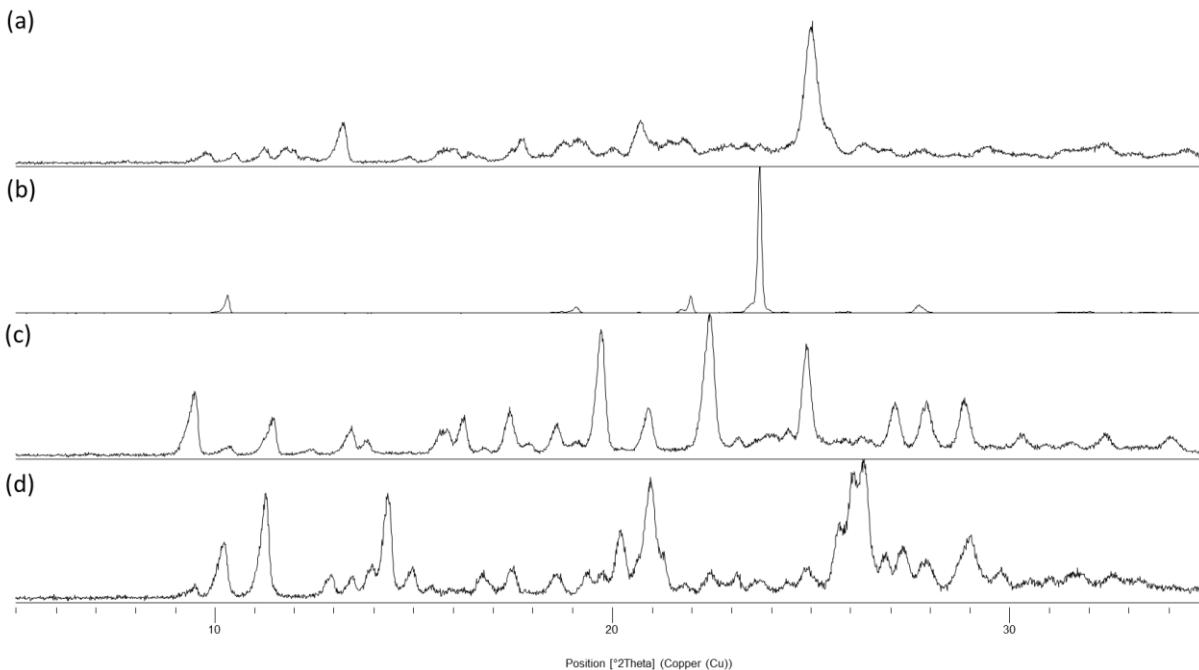

**Figure S39.** XRPD pattern of (a) nor, (b) pimelic acid and (c) a 1:1 mixture of nor and pimelic acid after ball-milling for 60 min at room temperature and (d) a 2:1 mixture of nor and pimelic acid after ball-milling for 60 min at room temperature.

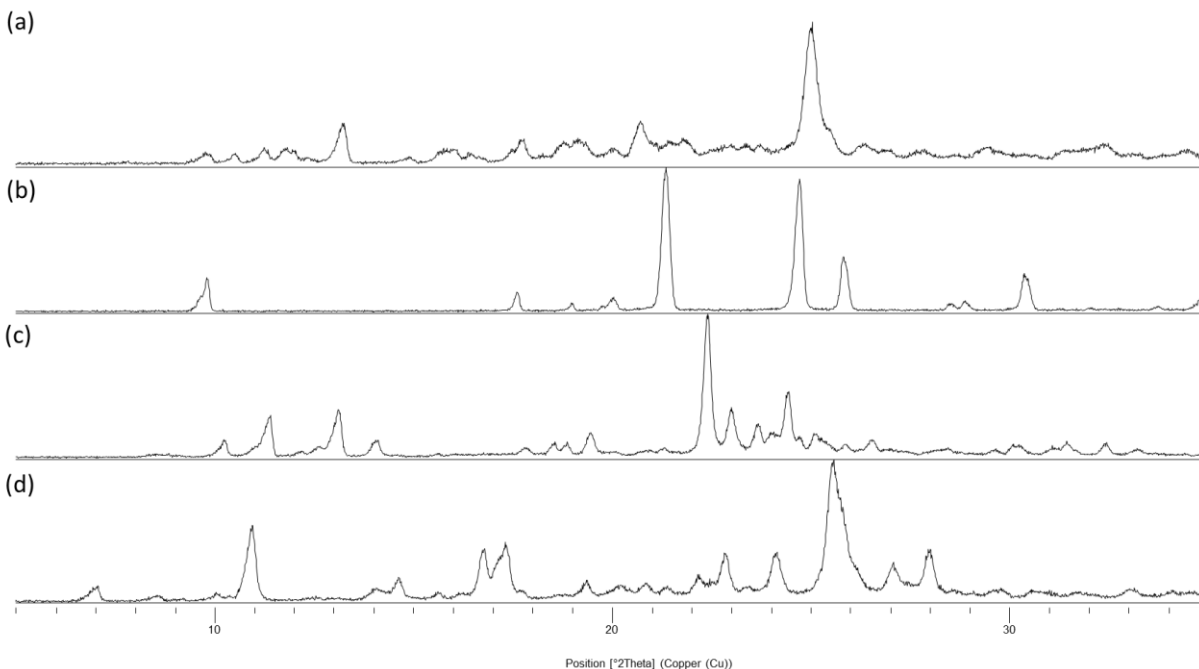

**Figure S40.** XRPD pattern of (a) nor, (b) suberic acid and (c) a 1:1 mixture of nor and suberic acid after ball-milling for 60 min at room temperature and (d) a 2:1 mixture of nor and suberic acid after ball-milling for 60 min at room temperature.

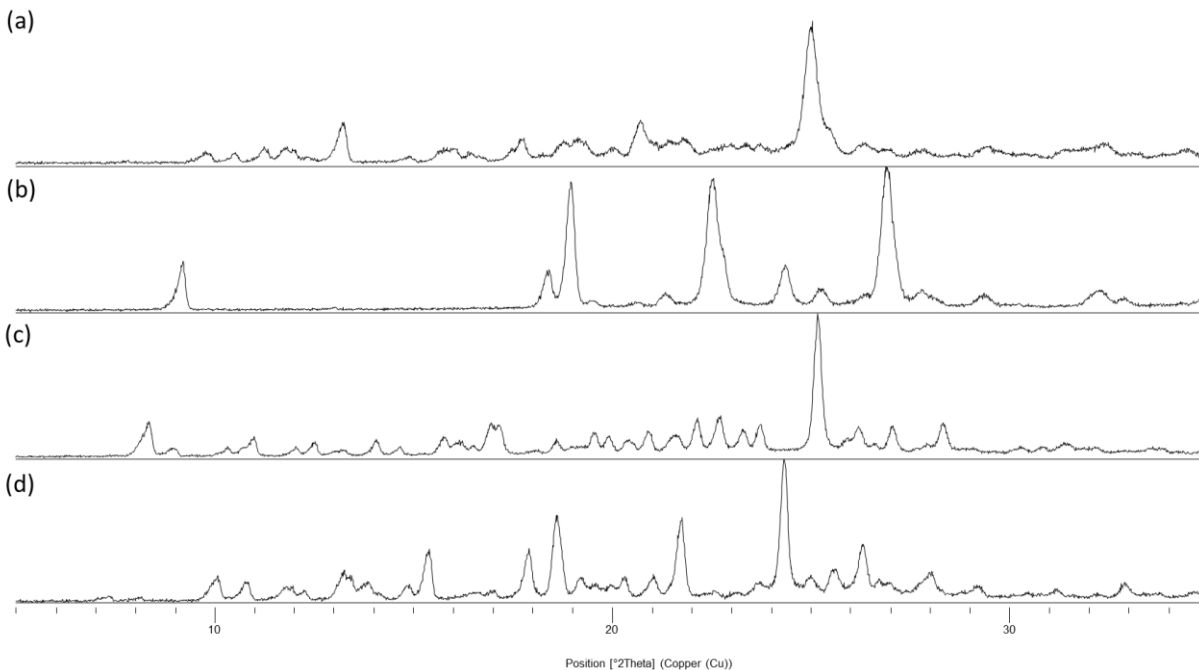

**Figure S41.** XRPD pattern of (a) nor, (b) azeliac acid, (c) a 1:1 mixture of nor and azeliac acid after ball-milling for 60 min at room temperature and (d) a 2:1 mixture of nor and azeliac acid after ball-milling for 60 min at room temperature.

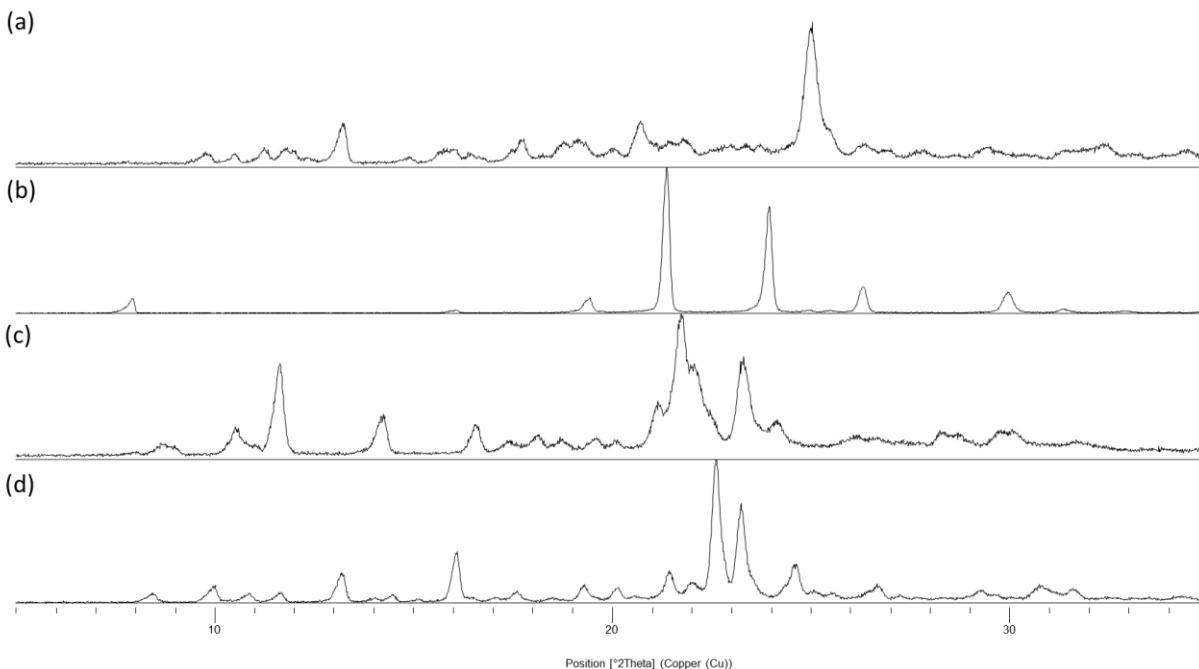

**Figure S42.** XRPD pattern of (a) nor, (b) sebacic acid, (c) a 1:1 mixture of nor and sebacic acid after ball-milling for 60 min at room temperature and (d) a 2:1 mixture of nor and sebacic acid after ball-milling for 60 min at room temperature.

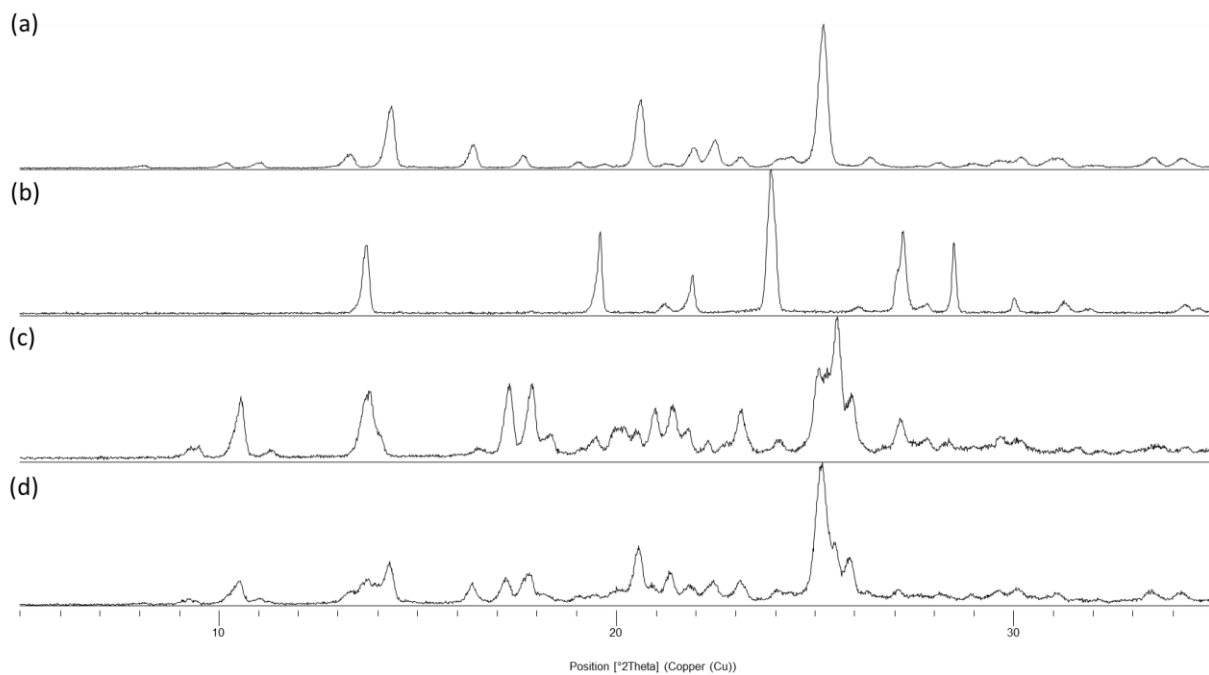

**Figure S43.** XRPD pattern of (a) cip, (b) glutaric acid, (c) a 1:1 mixture of cip and glutaric acid after ball-milling for 60 min at room temperature and (d) a 2:1 mixture of cip and glutaric acid after ball-milling for 60 min at room temperature.

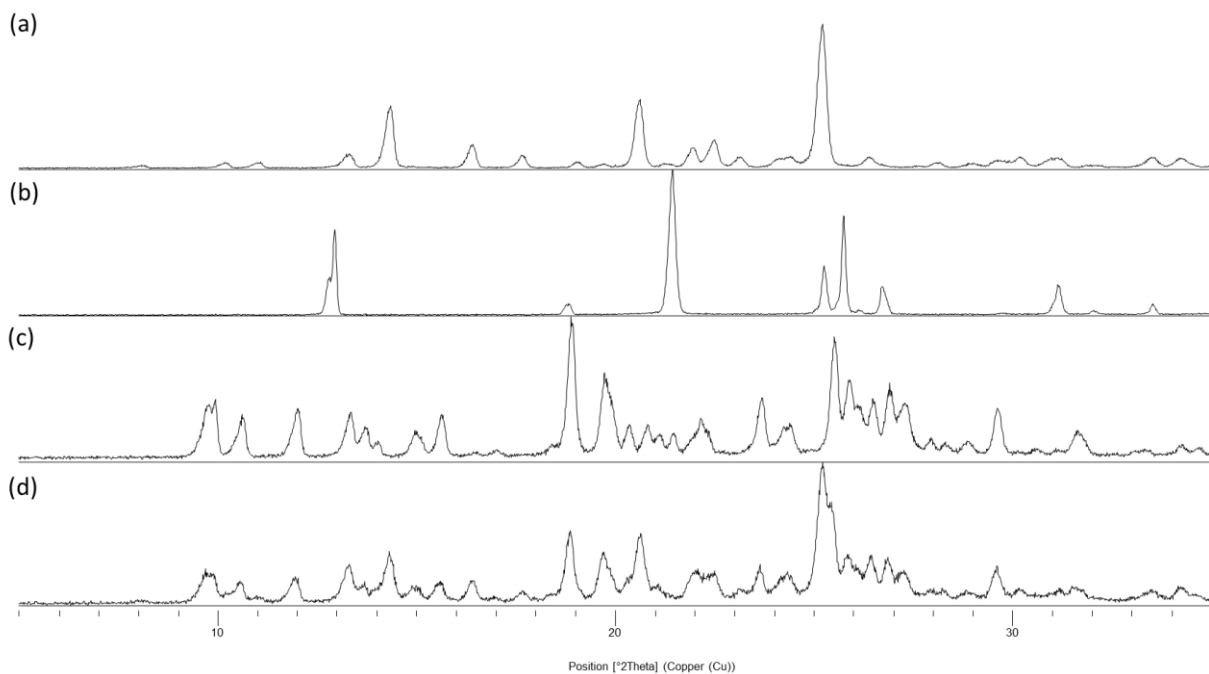

**Figure S44.** XRPD pattern of (a) cip, (b) adipic acid, (c) a 1:1 mixture of cip and adipic acid after ball-milling for 60 min at room temperature and (d) a 2:1 mixture of cip and adipic acid after ball-milling for 60 min at room temperature.

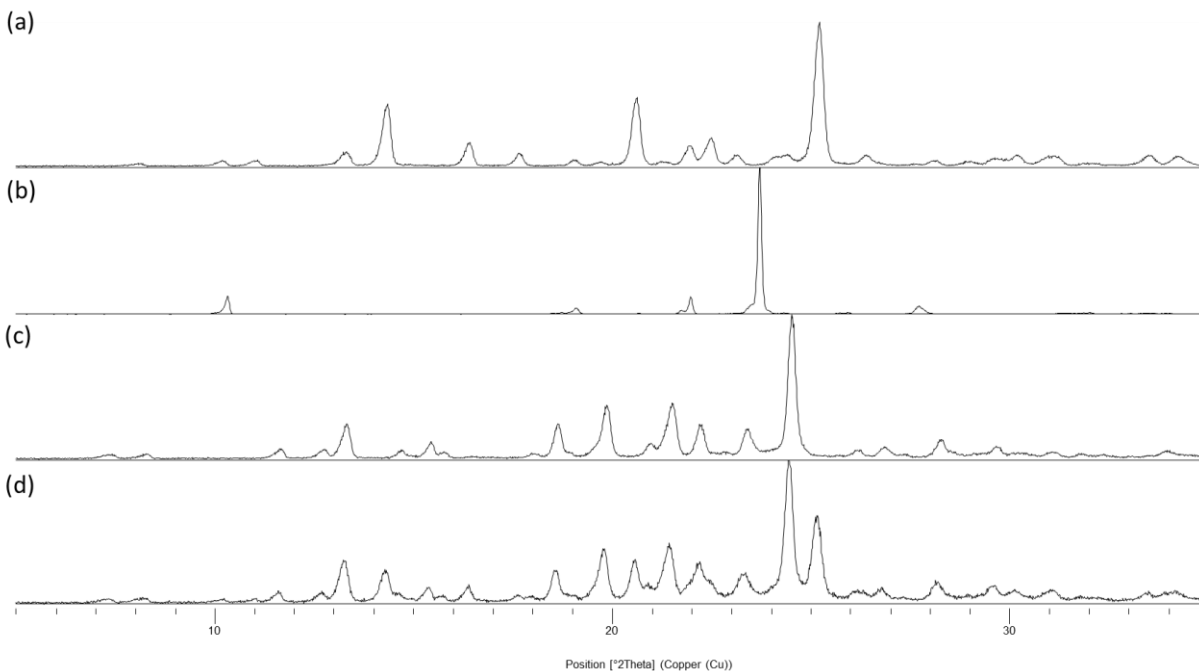

**Figure S45.** XRPD pattern of (a) cip, (b) pimelic acid, (c) a 1:1 mixture of cip and pimelic acid after ball-milling for 60 min at room temperature and (d) a 2:1 mixture of cip and pimelic acid after ball-milling for 60 min at room temperature.

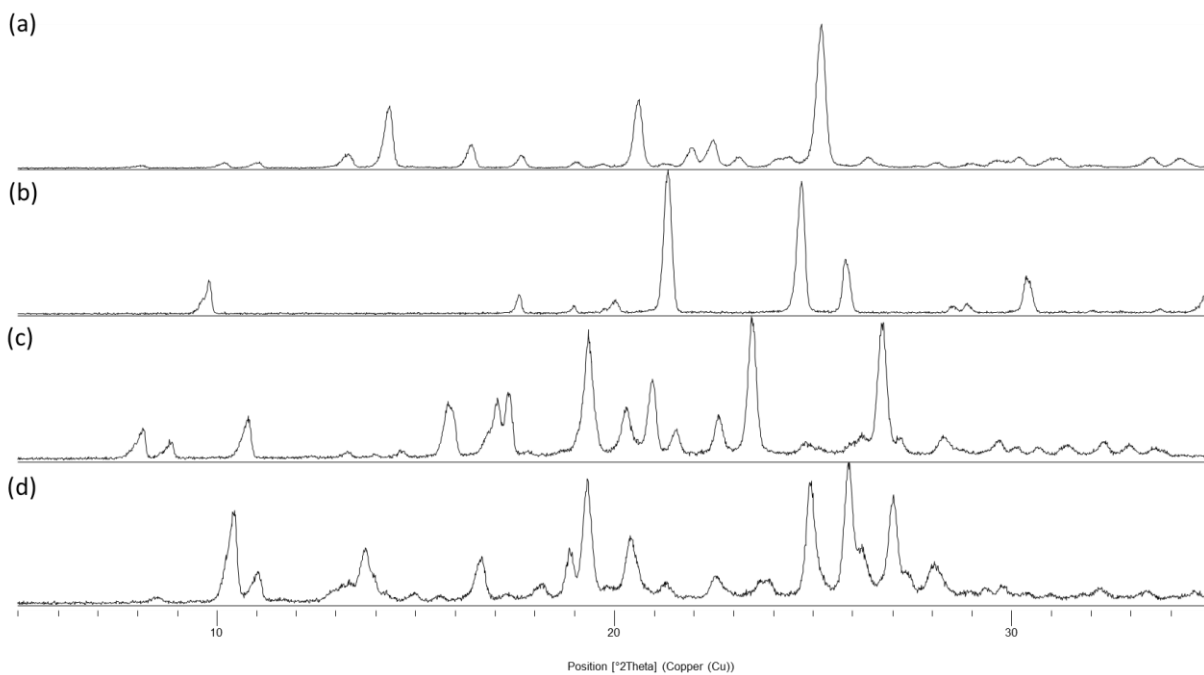

**Figure S46.** XRPD pattern of (a) cip, (b) suberic acid, (c) a 1:1 mixture of cip and suberic acid after ball-milling for 60 min at room temperature and (d) a 2:1 mixture of cip and suberic acid after ball-milling for 60 min at room temperature.

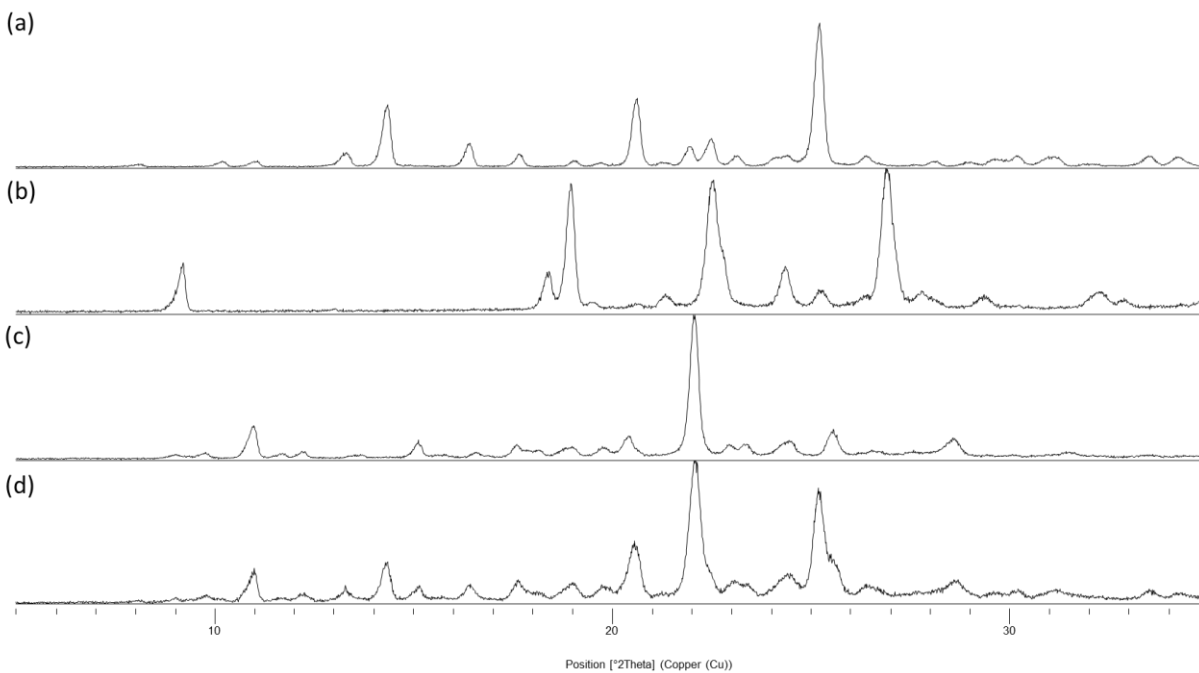

**Figure S47.** XRPD pattern of (a) cip, (b) azeliac acid, (c) a 1:1 mixture of cip and azeliac acid after ball-milling for 60 min at room temperature and (d) a 2:1 mixture of cip and azeliac acid after ball-milling for 60 min at room temperature.

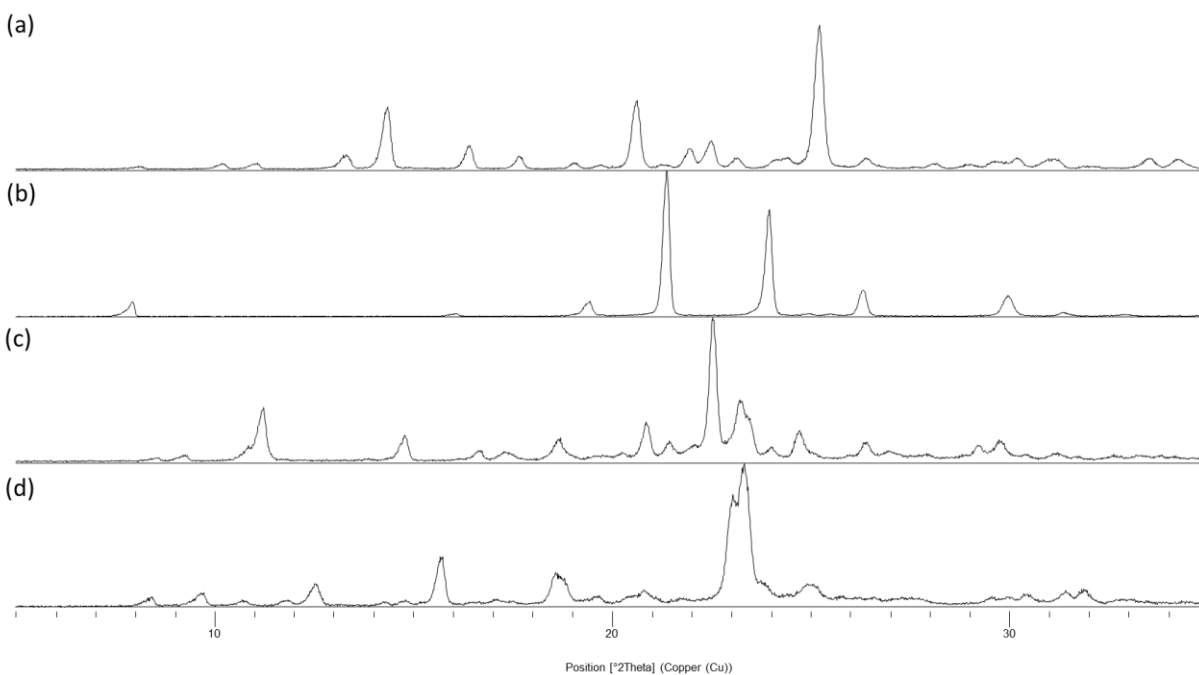

**Figure S48.** XRPD pattern of (a) cip, (b) sebacic acid, (c) a 1:1 mixture of cip and sebacic acid after ball-milling for 60 min at room temperature and (d) a 2:1 mixture of cip and sebacic acid after ball-milling for 60 min at room temperature.

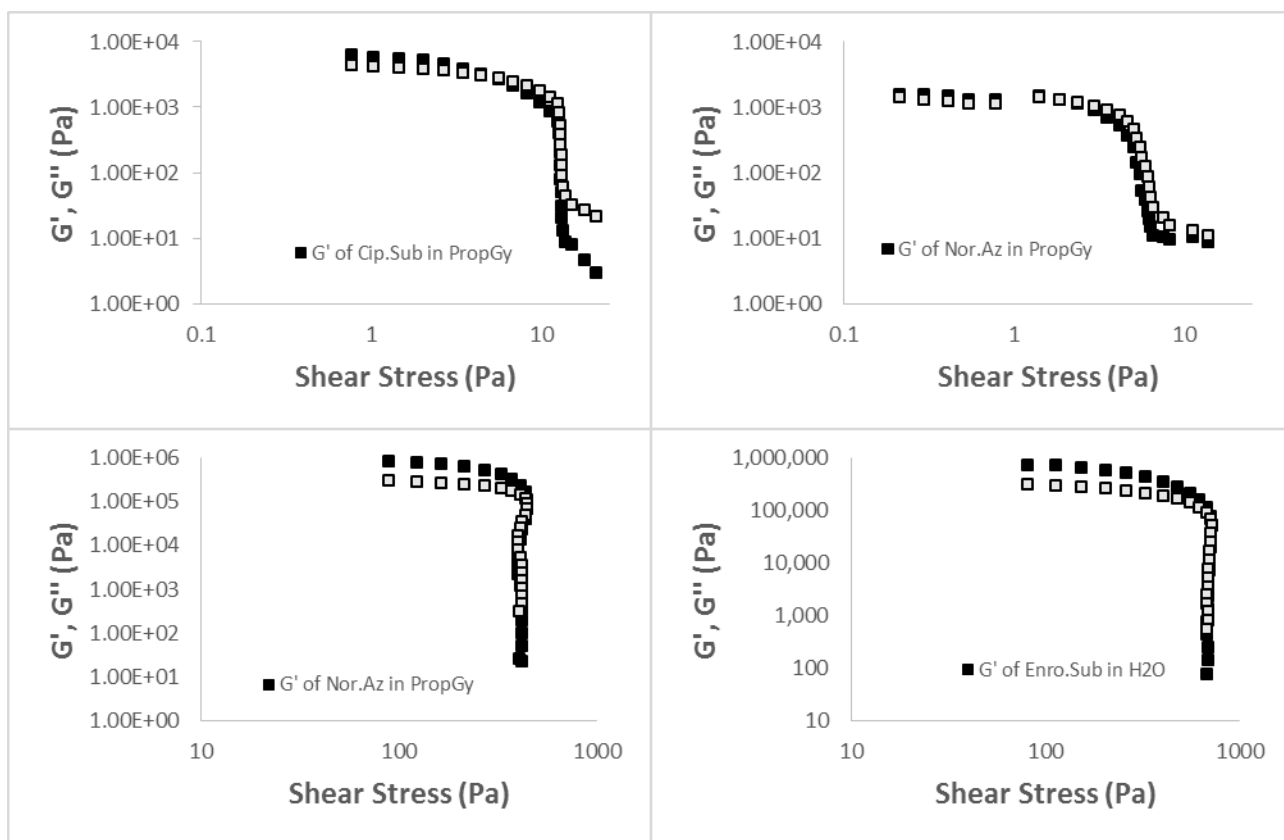

**Figure S49.** Rheological response (oscillatory amplitude sweep) of supramolecular gels of cip/sub from propylene glycol, nor/az from propylene glycol, enro/sub from propylene glycol and enro/sub from water.

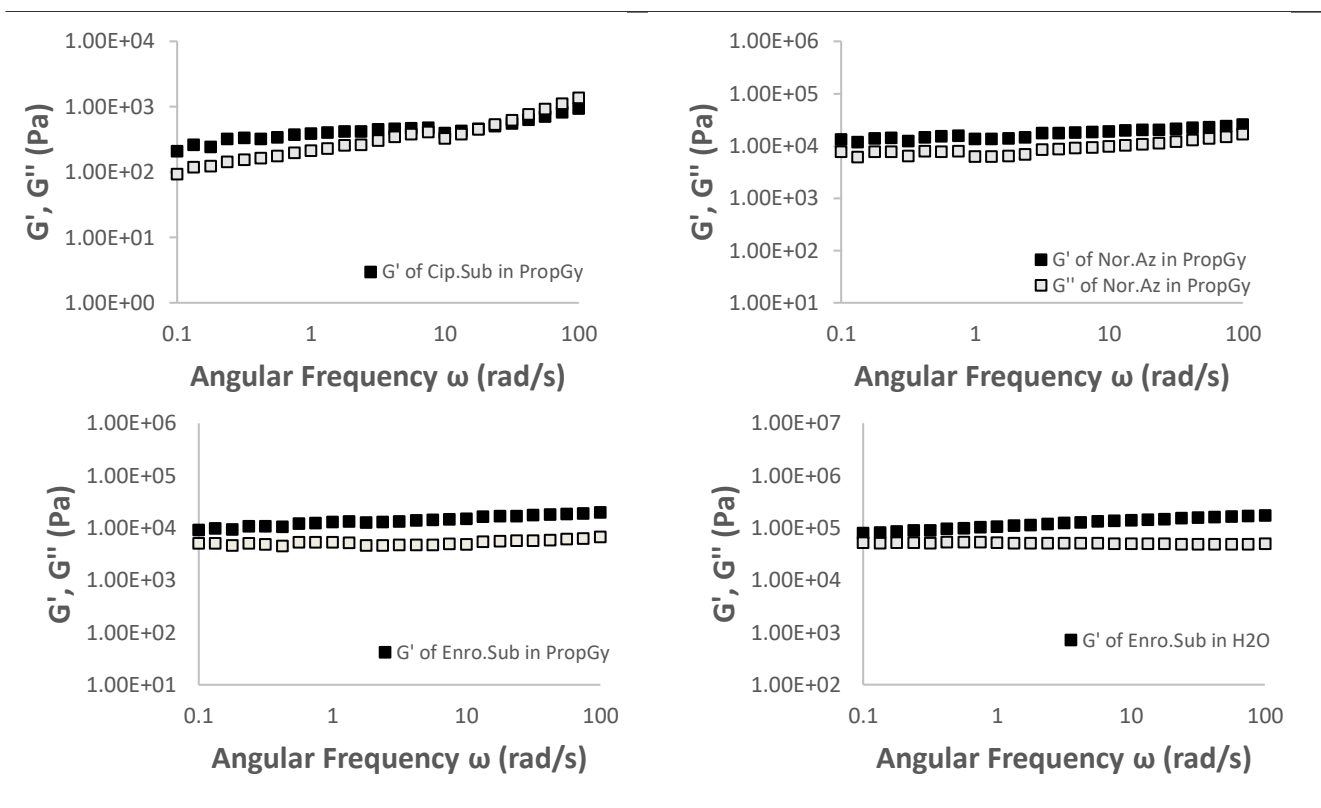

**Figure S50.** Rheological response (frequency sweep) of supramolecular gels of cip/sub from propylene glycol, nor/az from propylene glycol, enro/sub from propylene glycol and enro/sub from water

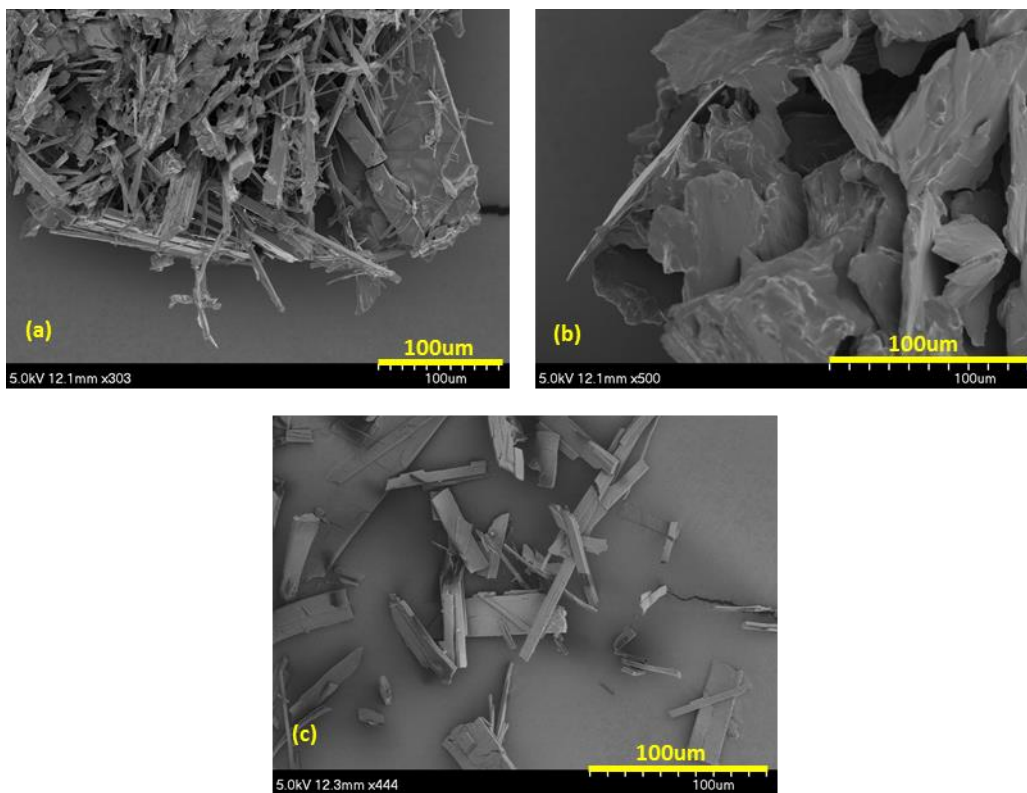

**Figure S51.** Scanning electron microscopy image of the (a) nor/az/propylene glycol, (b) cip/sub/propylene glycol and (c) enro/sub/water xerogels.



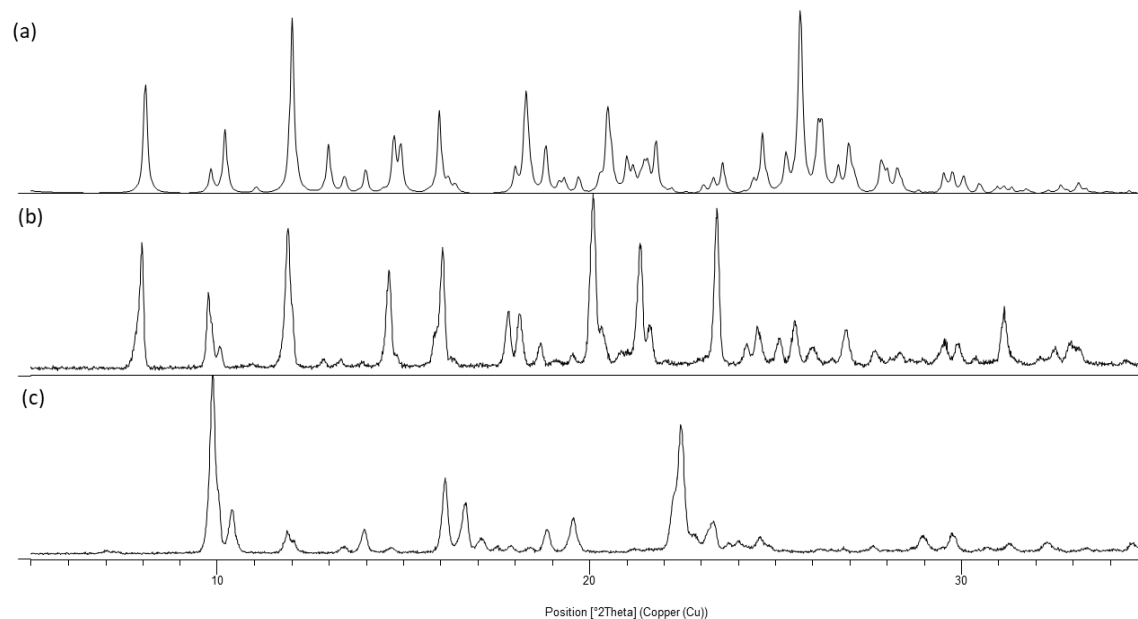

**Figure S52.** Comparison of the calculated powder pattern of  $(\text{enro}^+)(\text{sub}^-)\cdot\text{H}_2\text{O}$  (a), a gel of enro/sub/water dried under vacuum (b) and a gel of enro/sub/propylene glycol dried under vacuum (c).

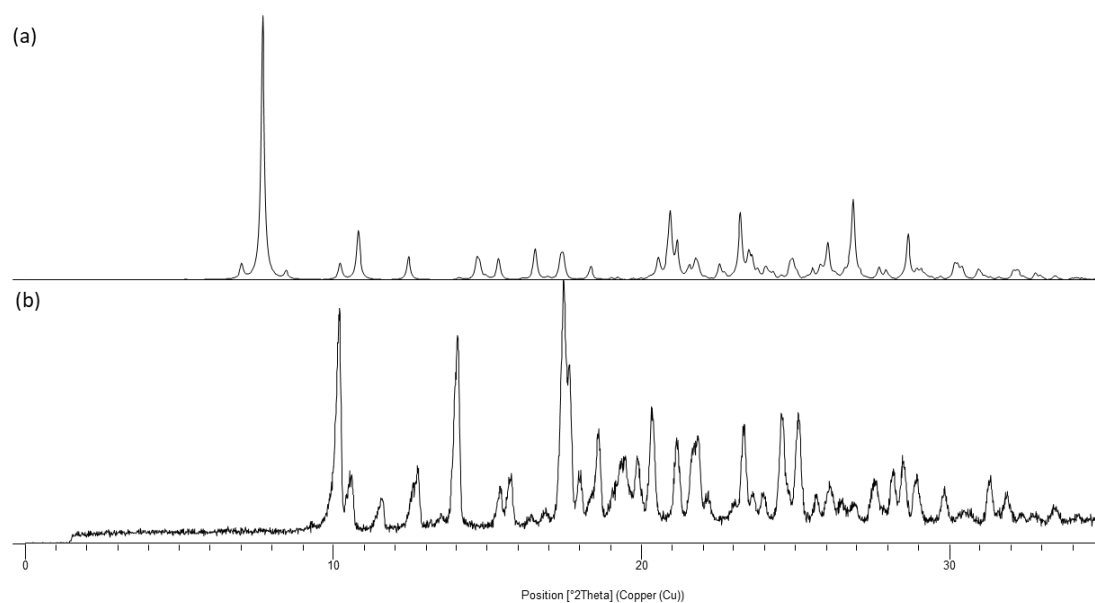

**Figure S53.** Comparison of the calculated powder pattern of  $(\text{nor}^+)_2(\text{az}^{2-})(\text{az})\cdot 4\text{H}_2\text{O}$  grown from methanol (a) and a gel of nor/az/propylene glycol dried under vacuum (b).
